# Supplementary material for: Cytotoxic polyhydroxylated pregnane glycosides from Cissampelos pareira var. hirsuta
Source: Royal Society of Chemistry journal article supplement (doi:10.1039/d1ra07498a), 2021-12-22
Supplement: d1ra07498a1.pdf [file d1ra07498a1.pdf]

**Cytotoxic polyhydroxylated pregnane glycosides from *Cissampelos pareira* var. *hirsuta***

Yan-Jun Sun,<sup>\*abc</sup> Hao-Jie Chen,<sup>ab</sup> Rui-Jie Han,<sup>ab</sup> Chen Zhao,<sup>ab</sup> Ying-Ying Si,<sup>ab</sup> Meng Li,<sup>ab</sup> Kun Du,<sup>ab</sup> Hui Chen,<sup>ab</sup> Wei-Sheng Feng<sup>\*ab</sup>

Fourteen new polyhydroxylated pregnane glycosides, cissasteroid A–N (**1–14**), and five known analogues (**15–19**), were isolated from the dried whole plant of *Cissampelos pareira* var. *hirsuta*. Their structures and stereochemistry were elucidated by extensive spectroscopic data, chemical hydrolysis, and ECD measurements. All the compounds were tested for their cytotoxicity against five human cancer cell lines, and inhibitory activity against NO release in LPS-induced RAW 264.7 cells. Compared with cisplatin, compound **7** showed more potent cytotoxicities against the HL-60, A549, SMMC-7721, MCF-7, and SW480 cell lines, with IC<sub>50</sub> values of 2.19, 14.38, 2.00, 7.58, and 7.44 μM, respectively. The preliminary study of structure-activity relationship indicated that benzoic acid esterification at C-20 may have a negative effect on the cytotoxic activity of polyhydroxylated pregnane derivatives in these five human cancer cell lines. These results revealed the potential of compound **7** as an ideal antitumor lead compound.

---

<sup>a</sup>Co-construction Collaborative Innovation Center for Chinese Medicine and Respiratory Diseases by Henan & Education Ministry of P. R. China, Henan University of Traditional Chinese Medicine, Zhengzhou 450046, P. R. China. E-mails: [sunyanjunily@126.com](mailto:sunyanjunily@126.com); [fwsh@hactcm.edu.cn](mailto:fwsh@hactcm.edu.cn)

<sup>b</sup>School of Pharmacy, Henan University of Traditional Chinese Medicine, Zhengzhou 450046, P. R. China

<sup>c</sup>Henan Research Center for Special Processing Technology of Chinese Medicine, Zhengzhou, 450046, P. R. China

## Table of Contents

|                                                                                            |    |
|--------------------------------------------------------------------------------------------|----|
| Figure S1. <sup>1</sup> H NMR spectrum (500 MHz) of <b>1</b> in CD <sub>3</sub> OD .....   | 5  |
| Figure S2. <sup>13</sup> C NMR spectrum (125 MHz) of <b>1</b> in CD <sub>3</sub> OD .....  | 5  |
| Figure S3. DEPT spectrum of <b>1</b> in CD <sub>3</sub> OD .....                           | 6  |
| Figure S4. <sup>1</sup> H- <sup>1</sup> H COSY of <b>1</b> in CD <sub>3</sub> OD .....     | 6  |
| Figure S5. HSQC of <b>1</b> in CD <sub>3</sub> OD .....                                    | 7  |
| Figure S6. HMBC of <b>1</b> in CD <sub>3</sub> OD .....                                    | 7  |
| Figure S8. NOESY of <b>1</b> in CD <sub>3</sub> OD.....                                    | 8  |
| Figure S9. <sup>1</sup> H NMR spectrum (500 MHz) of <b>2</b> in CD <sub>3</sub> OD .....   | 8  |
| Figure S10. <sup>13</sup> C NMR spectrum (125 MHz) of <b>2</b> in CD <sub>3</sub> OD ..... | 9  |
| Figure S11. DEPT spectrum of <b>2</b> in CD <sub>3</sub> OD .....                          | 9  |
| Figure S12. <sup>1</sup> H- <sup>1</sup> H COSY of <b>2</b> in CD <sub>3</sub> OD .....    | 10 |
| Figure S13. HSQC of <b>2</b> in CD <sub>3</sub> OD .....                                   | 10 |
| Figure S14. HMBC of <b>2</b> in CD <sub>3</sub> OD .....                                   | 11 |
| Figure S15. NOESY of <b>2</b> in CD <sub>3</sub> OD.....                                   | 11 |
| Figure S16. <sup>1</sup> H NMR spectrum (500 MHz) of <b>3</b> in CD <sub>3</sub> OD .....  | 12 |
| Figure S17. <sup>13</sup> C NMR spectrum (125 MHz) of <b>3</b> in CD <sub>3</sub> OD ..... | 12 |
| Figure S18. DEPT spectrum of <b>3</b> in CD <sub>3</sub> OD .....                          | 13 |
| Figure S19. <sup>1</sup> H- <sup>1</sup> H COSY of <b>3</b> in CD <sub>3</sub> OD .....    | 13 |
| Figure S20. HSQC of <b>3</b> in CD <sub>3</sub> OD .....                                   | 14 |
| Figure S21. HMBC of <b>3</b> in CD <sub>3</sub> OD .....                                   | 14 |
| Figure S21. NOESY of <b>3</b> in CD <sub>3</sub> OD.....                                   | 15 |
| Figure S22. <sup>1</sup> H NMR spectrum (500 MHz) of <b>4</b> in CD <sub>3</sub> OD .....  | 15 |
| Figure S23. <sup>13</sup> C NMR spectrum (125 MHz) of <b>4</b> in CD <sub>3</sub> OD ..... | 16 |
| Figure S24. DEPT spectrum of <b>4</b> in CD <sub>3</sub> OD .....                          | 16 |
| Figure S25. <sup>1</sup> H- <sup>1</sup> H COSY of <b>4</b> in CD <sub>3</sub> OD .....    | 17 |
| Figure S26. HSQC of <b>4</b> in CD <sub>3</sub> OD .....                                   | 17 |
| Figure S27. HMBC of <b>4</b> in CD <sub>3</sub> OD .....                                   | 18 |
| Figure S28. NOESY of <b>4</b> in CD <sub>3</sub> OD.....                                   | 18 |
| Figure S29. <sup>1</sup> H NMR spectrum (500 MHz) of <b>5</b> in CD <sub>3</sub> OD .....  | 19 |
| Figure S30. <sup>13</sup> C NMR spectrum (125 MHz) of <b>5</b> in CD <sub>3</sub> OD ..... | 19 |
| Figure S31. DEPT spectrum of <b>5</b> in CD <sub>3</sub> OD .....                          | 20 |
| Figure S32. <sup>1</sup> H- <sup>1</sup> H COSY of <b>5</b> in CD <sub>3</sub> OD .....    | 20 |
| Figure S33. HSQC of <b>5</b> in CD <sub>3</sub> OD .....                                   | 21 |
| Figure S34. HMBC of <b>5</b> in CD <sub>3</sub> OD .....                                   | 21 |
| Figure S35. NOESY of <b>5</b> in CD <sub>3</sub> OD.....                                   | 22 |
| Figure S36. <sup>1</sup> H NMR spectrum (500 MHz) of <b>6</b> in CD <sub>3</sub> OD .....  | 22 |
| Figure S37. <sup>13</sup> C NMR spectrum (125 MHz) of <b>6</b> in CD <sub>3</sub> OD ..... | 23 |
| Figure S38. DEPT spectrum of <b>6</b> in CD <sub>3</sub> OD .....                          | 23 |
| Figure S39. <sup>1</sup> H- <sup>1</sup> H COSY of <b>6</b> in CD <sub>3</sub> OD .....    | 24 |
| Figure S40. HSQC of <b>6</b> in CD <sub>3</sub> OD .....                                   | 24 |
| Figure S41. HMBC of <b>6</b> in CD <sub>3</sub> OD .....                                   | 25 |
| Figure S42. NOESY of <b>6</b> in CD <sub>3</sub> OD.....                                   | 25 |
| Figure S43. <sup>1</sup> H NMR spectrum (500 MHz) of <b>7</b> in CDCl <sub>3</sub> .....   | 26 |

|                                                                                                 |    |
|-------------------------------------------------------------------------------------------------|----|
| Figure S44. $^{13}\text{C}$ NMR spectrum (125 MHz) of <b>7</b> in $\text{CDCl}_3$ .....         | 26 |
| Figure S45. DEPT spectrum of <b>7</b> in $\text{CDCl}_3$ .....                                  | 27 |
| Figure S46. $^1\text{H}$ - $^1\text{H}$ COSY of <b>7</b> in $\text{CDCl}_3$ .....               | 27 |
| Figure S47. HSQC of <b>7</b> in $\text{CDCl}_3$ .....                                           | 28 |
| Figure S48. HMBC of <b>7</b> in $\text{CDCl}_3$ .....                                           | 28 |
| Figure S49. NOESY of <b>7</b> in $\text{CDCl}_3$ .....                                          | 29 |
| Figure S50. $^1\text{H}$ NMR spectrum (500 MHz) of <b>8</b> in $\text{CD}_3\text{OD}$ .....     | 29 |
| Figure S51. $^{13}\text{C}$ NMR spectrum (125 MHz) of <b>8</b> in $\text{CD}_3\text{OD}$ .....  | 30 |
| Figure S52. DEPT spectrum of <b>8</b> in $\text{CD}_3\text{OD}$ .....                           | 30 |
| Figure S53. $^1\text{H}$ - $^1\text{H}$ COSY of <b>8</b> in $\text{CD}_3\text{OD}$ .....        | 31 |
| Figure S54. HSQC of <b>8</b> in $\text{CD}_3\text{OD}$ .....                                    | 31 |
| Figure S55. HMBC of <b>8</b> in $\text{CD}_3\text{OD}$ .....                                    | 32 |
| Figure S56. NOESY of <b>8</b> in $\text{CD}_3\text{OD}$ .....                                   | 32 |
| Figure S57. $^1\text{H}$ NMR spectrum (500 MHz) of <b>9</b> in $\text{CD}_3\text{OD}$ .....     | 33 |
| Figure S58. $^{13}\text{C}$ NMR spectrum (125 MHz) of <b>9</b> in $\text{CD}_3\text{OD}$ .....  | 33 |
| Figure S59. DEPT spectrum of <b>9</b> in $\text{CD}_3\text{OD}$ .....                           | 34 |
| Figure S60. $^1\text{H}$ - $^1\text{H}$ COSY of <b>9</b> in $\text{CD}_3\text{OD}$ .....        | 34 |
| Figure S61. HSQC of <b>9</b> in $\text{CD}_3\text{OD}$ .....                                    | 35 |
| Figure S62. HMBC of <b>9</b> in $\text{CD}_3\text{OD}$ .....                                    | 35 |
| Figure S63. NOESY of <b>9</b> in $\text{CD}_3\text{OD}$ .....                                   | 36 |
| Figure S64. $^1\text{H}$ NMR spectrum (500 MHz) of <b>10</b> in $\text{CD}_3\text{OD}$ .....    | 36 |
| Figure S65. $^{13}\text{C}$ NMR spectrum (125 MHz) of <b>10</b> in $\text{CD}_3\text{OD}$ ..... | 37 |
| Figure S66. DEPT spectrum of <b>10</b> in $\text{CD}_3\text{OD}$ .....                          | 37 |
| Figure S67. $^1\text{H}$ - $^1\text{H}$ COSY of <b>10</b> in $\text{CD}_3\text{OD}$ .....       | 38 |
| Figure S68. HSQC of <b>10</b> in $\text{CD}_3\text{OD}$ .....                                   | 38 |
| Figure S69. HMBC of <b>10</b> in $\text{CD}_3\text{OD}$ .....                                   | 39 |
| Figure S70. NOESY of <b>10</b> in $\text{CD}_3\text{OD}$ .....                                  | 39 |
| Figure S71. $^1\text{H}$ NMR spectrum (500 MHz) of <b>11</b> in $\text{CD}_3\text{OD}$ .....    | 40 |
| Figure S72. $^{13}\text{C}$ NMR spectrum (125 MHz) of <b>11</b> in $\text{CD}_3\text{OD}$ ..... | 40 |
| Figure S73. DEPT spectrum of <b>11</b> in $\text{CD}_3\text{OD}$ .....                          | 41 |
| Figure S74. $^1\text{H}$ - $^1\text{H}$ COSY of <b>11</b> in $\text{CD}_3\text{OD}$ .....       | 41 |
| Figure S75. HSQC of <b>11</b> in $\text{CD}_3\text{OD}$ .....                                   | 42 |
| Figure S76. HMBC of <b>11</b> in $\text{CD}_3\text{OD}$ .....                                   | 42 |
| Figure S77. NOESY of <b>11</b> in $\text{CD}_3\text{OD}$ .....                                  | 43 |
| Figure S78. $^1\text{H}$ NMR spectrum (500 MHz) of <b>12</b> in $\text{CD}_3\text{OD}$ .....    | 43 |
| Figure S79. $^{13}\text{C}$ NMR spectrum (125 MHz) of <b>12</b> in $\text{CD}_3\text{OD}$ ..... | 44 |
| Figure S80. DEPT spectrum of <b>12</b> in $\text{CD}_3\text{OD}$ .....                          | 44 |
| Figure S81. $^1\text{H}$ - $^1\text{H}$ COSY of <b>12</b> in $\text{CD}_3\text{OD}$ .....       | 45 |
| Figure S82. HSQC of <b>12</b> in $\text{CD}_3\text{OD}$ .....                                   | 45 |
| Figure S83. HMBC of <b>12</b> in $\text{CD}_3\text{OD}$ .....                                   | 46 |
| Figure S84. NOESY of <b>12</b> in $\text{CD}_3\text{OD}$ .....                                  | 46 |
| Figure S85. $^1\text{H}$ NMR spectrum (500 MHz) of <b>13</b> in $\text{CD}_3\text{OD}$ .....    | 47 |
| Figure S86. $^{13}\text{C}$ NMR spectrum (125 MHz) of <b>13</b> in $\text{CD}_3\text{OD}$ ..... | 47 |
| Figure S87. DEPT spectrum of <b>13</b> in $\text{CD}_3\text{OD}$ .....                          | 48 |

|                                                                                                 |    |
|-------------------------------------------------------------------------------------------------|----|
| Figure S88. $^1\text{H}$ - $^1\text{H}$ COSY of <b>13</b> in $\text{CD}_3\text{OD}$ .....       | 48 |
| Figure S89. HSQC of <b>13</b> in $\text{CD}_3\text{OD}$ .....                                   | 49 |
| Figure S90. HMBC of <b>13</b> in $\text{CD}_3\text{OD}$ .....                                   | 49 |
| Figure S91. NOESY of <b>13</b> in $\text{CD}_3\text{OD}$ .....                                  | 50 |
| Figure S92. $^1\text{H}$ NMR spectrum (500 MHz) of <b>14</b> in $\text{CD}_3\text{OD}$ .....    | 50 |
| Figure S93. $^{13}\text{C}$ NMR spectrum (125 MHz) of <b>14</b> in $\text{CD}_3\text{OD}$ ..... | 51 |
| Figure S94. DEPT spectrum of <b>14</b> in $\text{CD}_3\text{OD}$ .....                          | 51 |
| Figure S95. $^1\text{H}$ - $^1\text{H}$ COSY of <b>14</b> in $\text{CD}_3\text{OD}$ .....       | 52 |
| Figure S96. HSQC of <b>14</b> in $\text{CD}_3\text{OD}$ .....                                   | 52 |
| Figure S97. HMBC of <b>14</b> in $\text{CD}_3\text{OD}$ .....                                   | 53 |
| Figure S98. NOESY of <b>14</b> in $\text{CD}_3\text{OD}$ .....                                  | 53 |

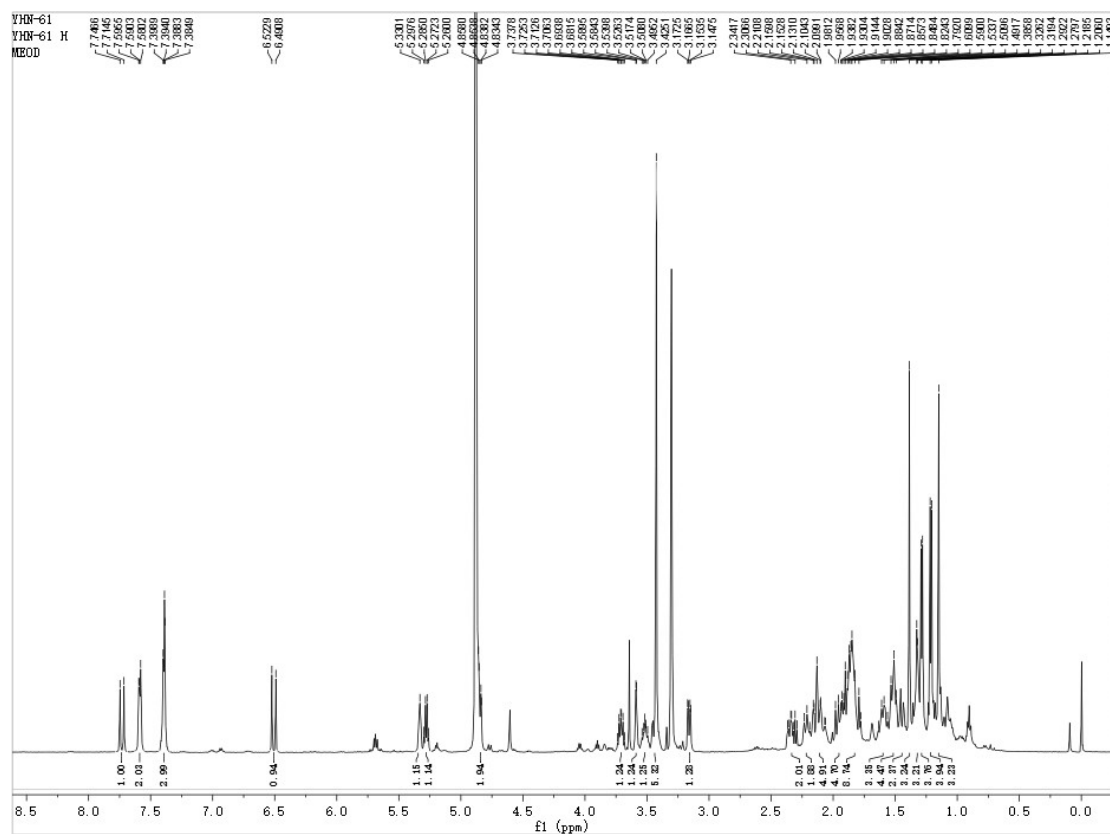

Figure S1.  $^1\text{H}$  NMR spectrum (500 MHz) of **1** in  $\text{CD}_3\text{OD}$

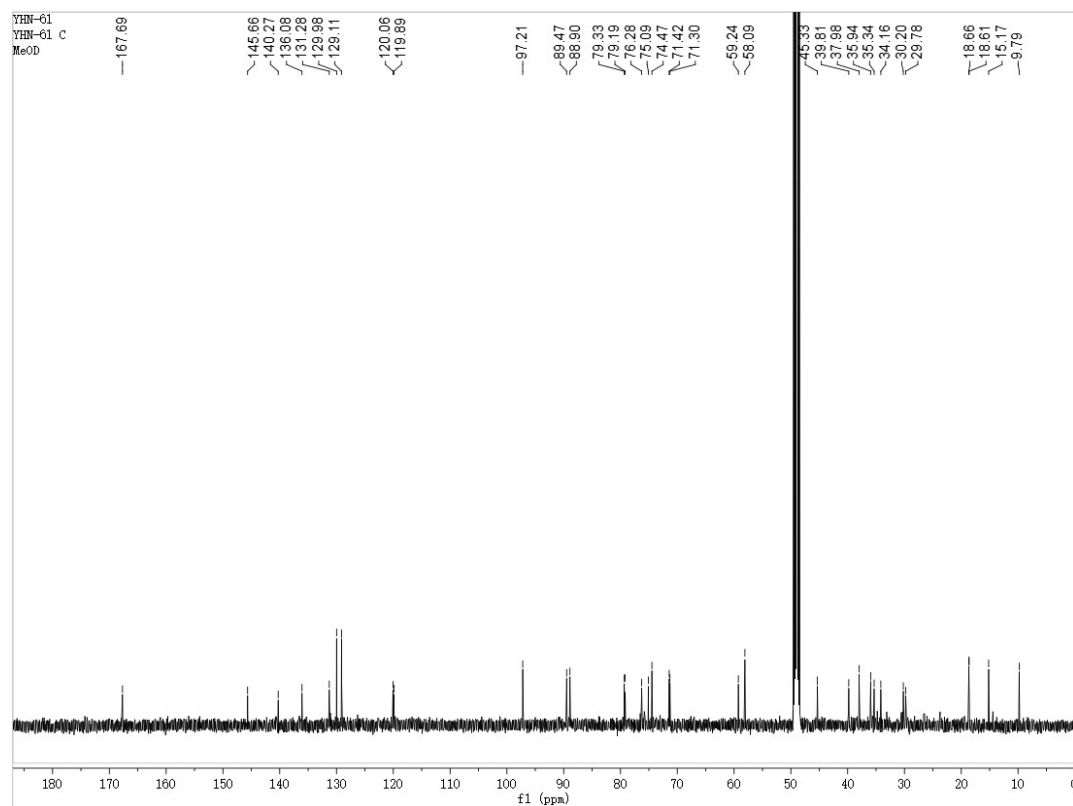

Figure S2.  $^{13}\text{C}$  NMR spectrum (125 MHz) of **1** in  $\text{CD}_3\text{OD}$

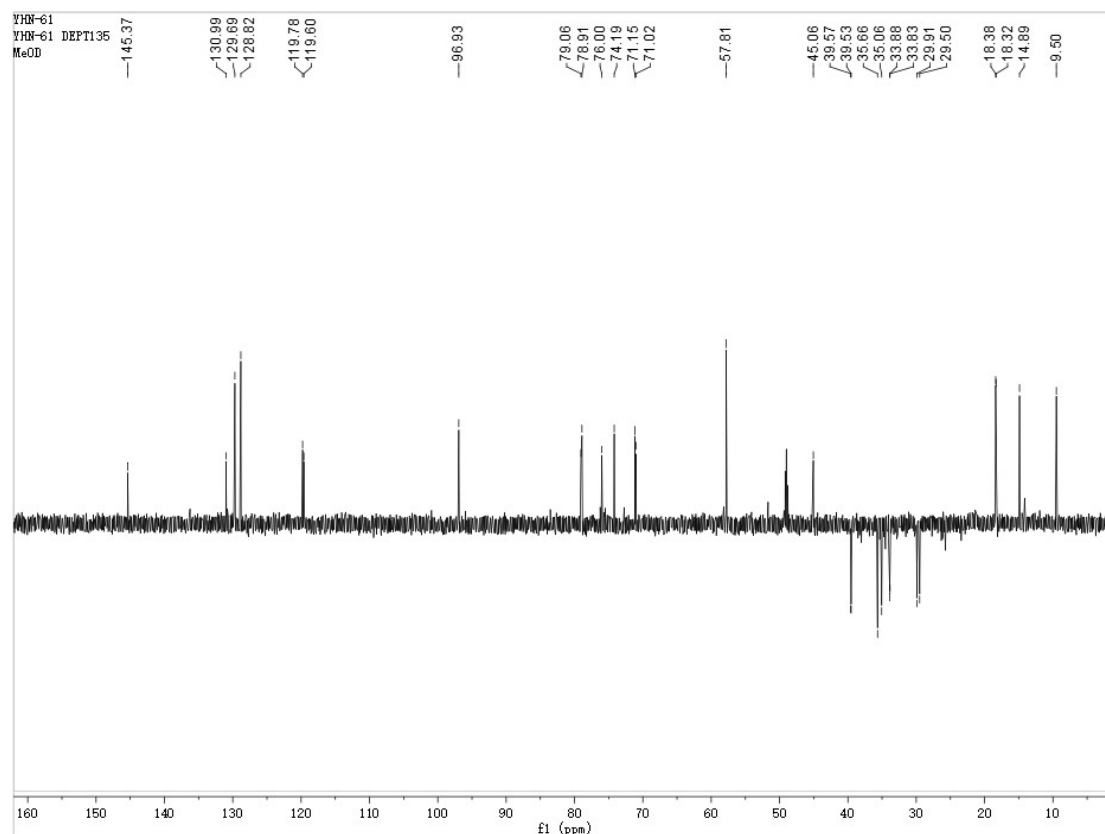

Figure S3. DEPT spectrum of **1** in CD<sub>3</sub>OD

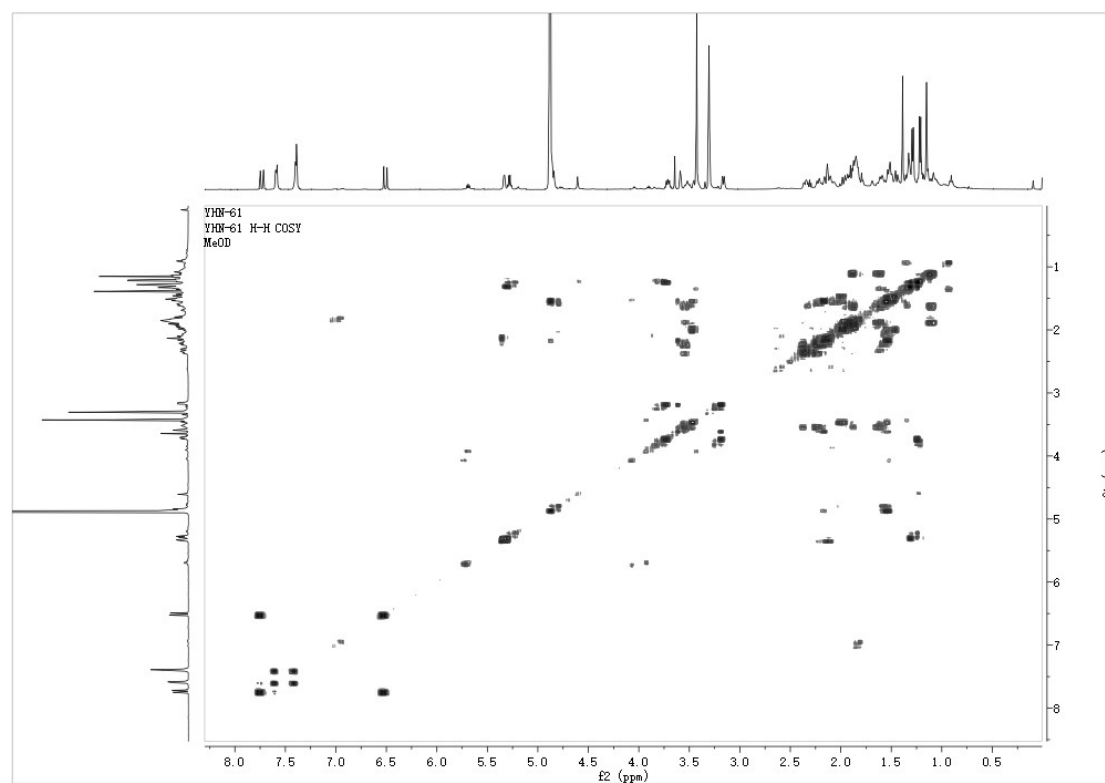

Figure S4. <sup>1</sup>H-<sup>1</sup>H COSY of **1** in CD<sub>3</sub>OD

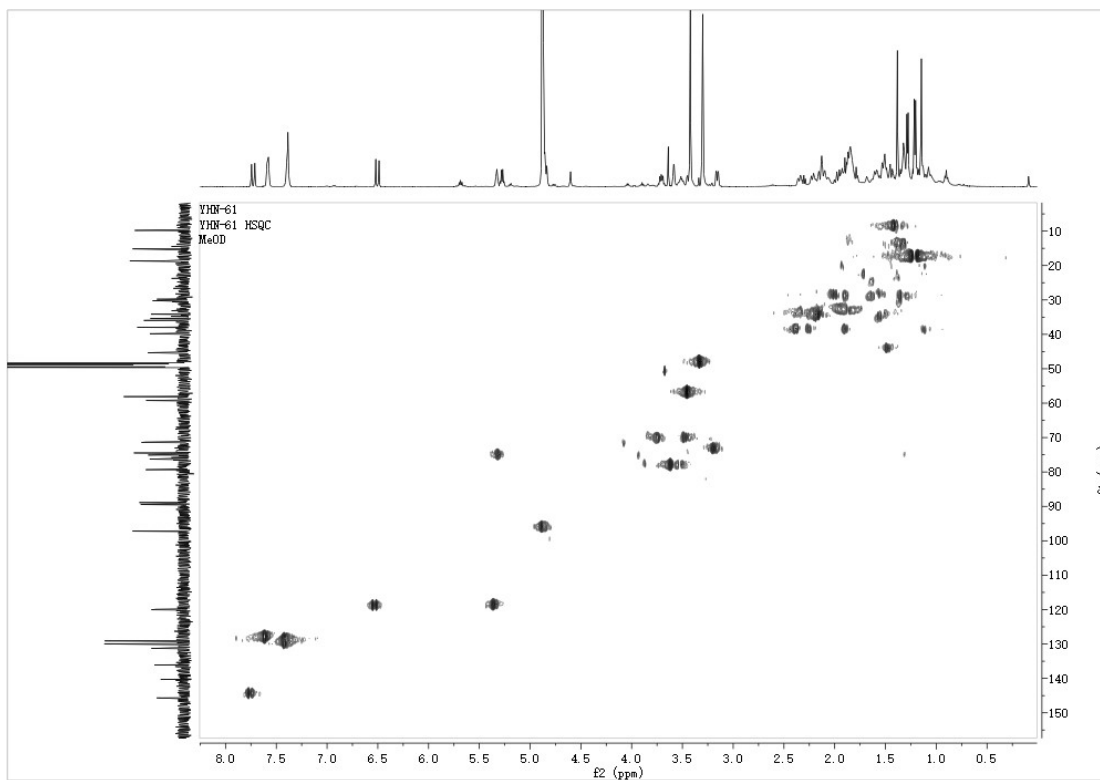

Figure S5. HSQC of **1** in CD<sub>3</sub>OD

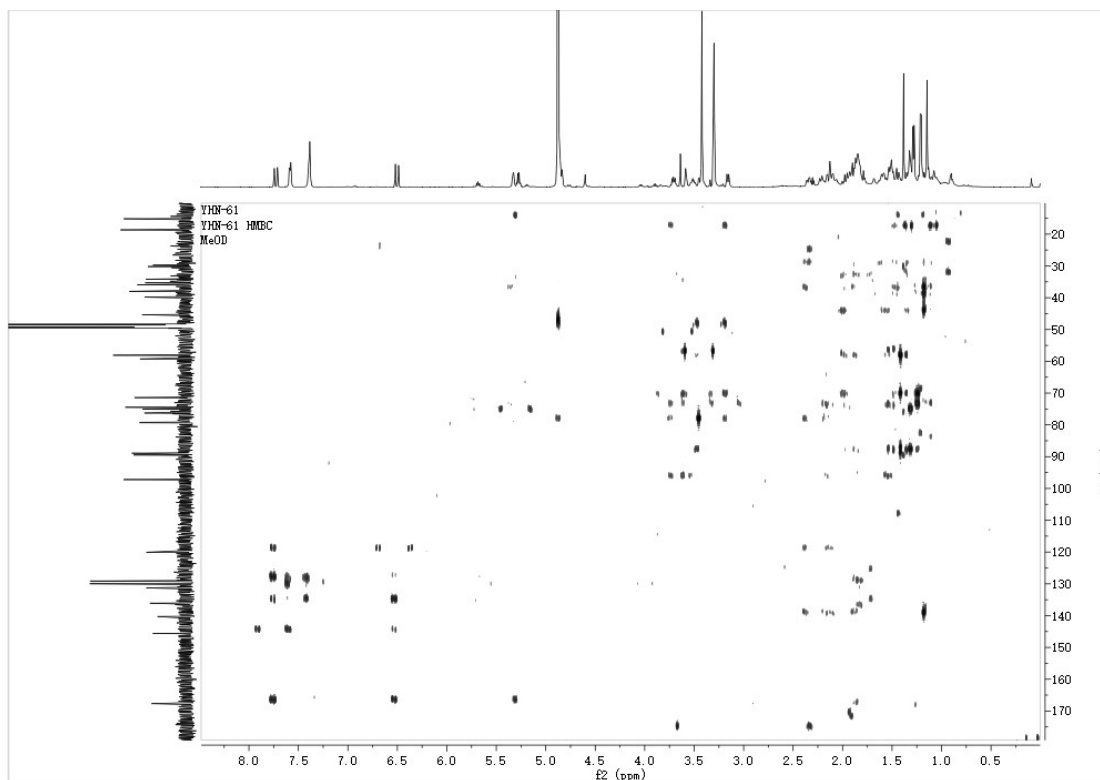

Figure S6. HMBC of **1** in CD<sub>3</sub>OD

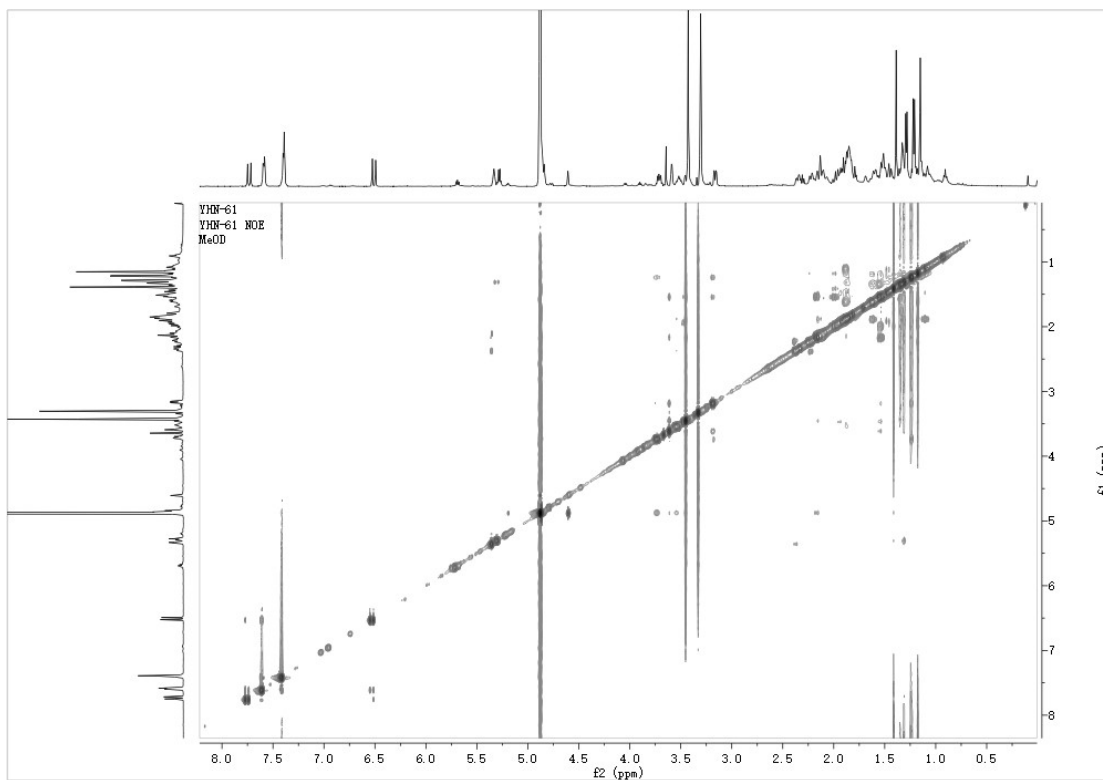

Figure S7. NOESY of 1 in CD<sub>3</sub>OD

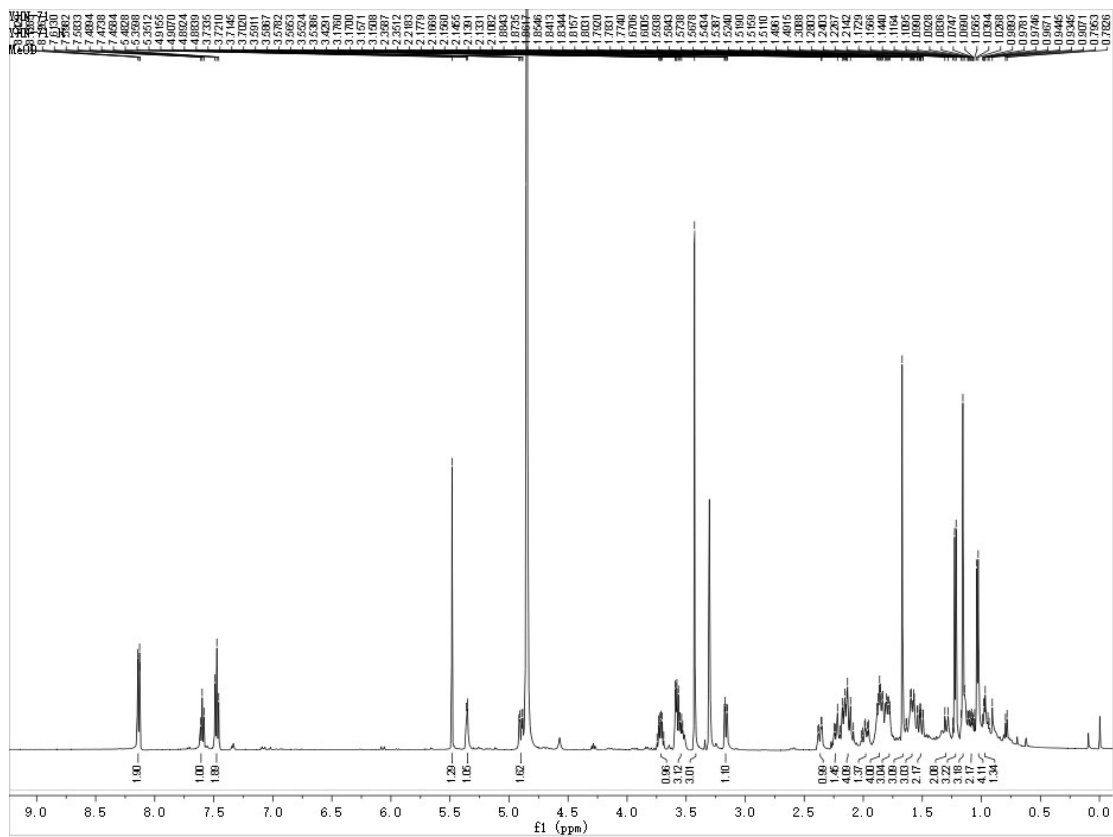

Figure S8. <sup>1</sup>H NMR spectrum (500 MHz) of 2 in CD<sub>3</sub>OD



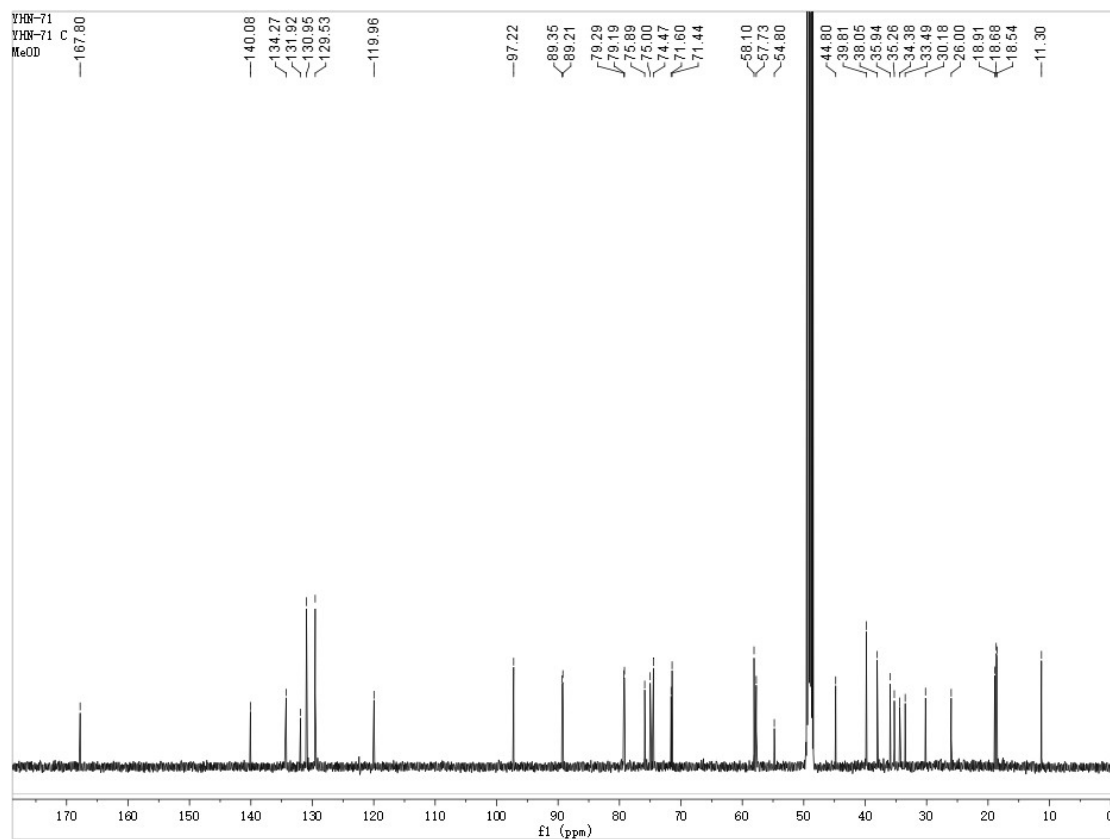

Figure S9.  $^{13}\text{C}$  NMR spectrum (125 MHz) of **2** in  $\text{CD}_3\text{OD}$

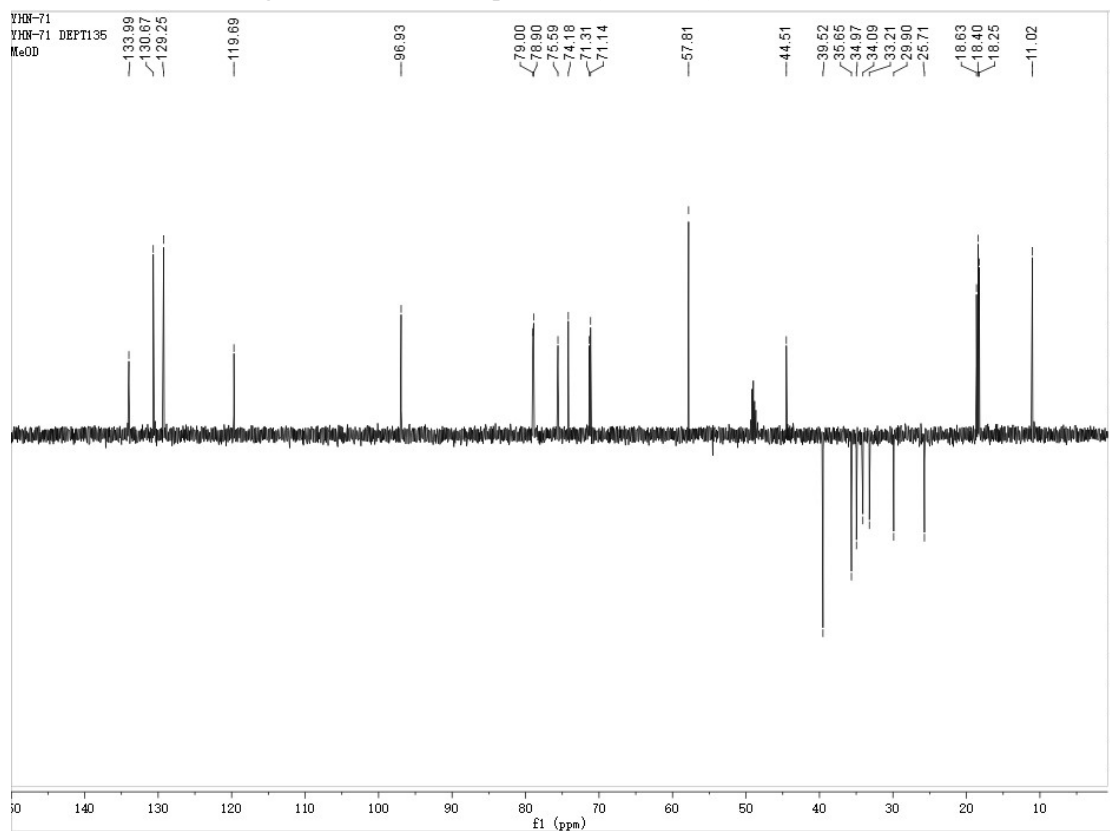

Figure S10. DEPT spectrum of **2** in  $\text{CD}_3\text{OD}$

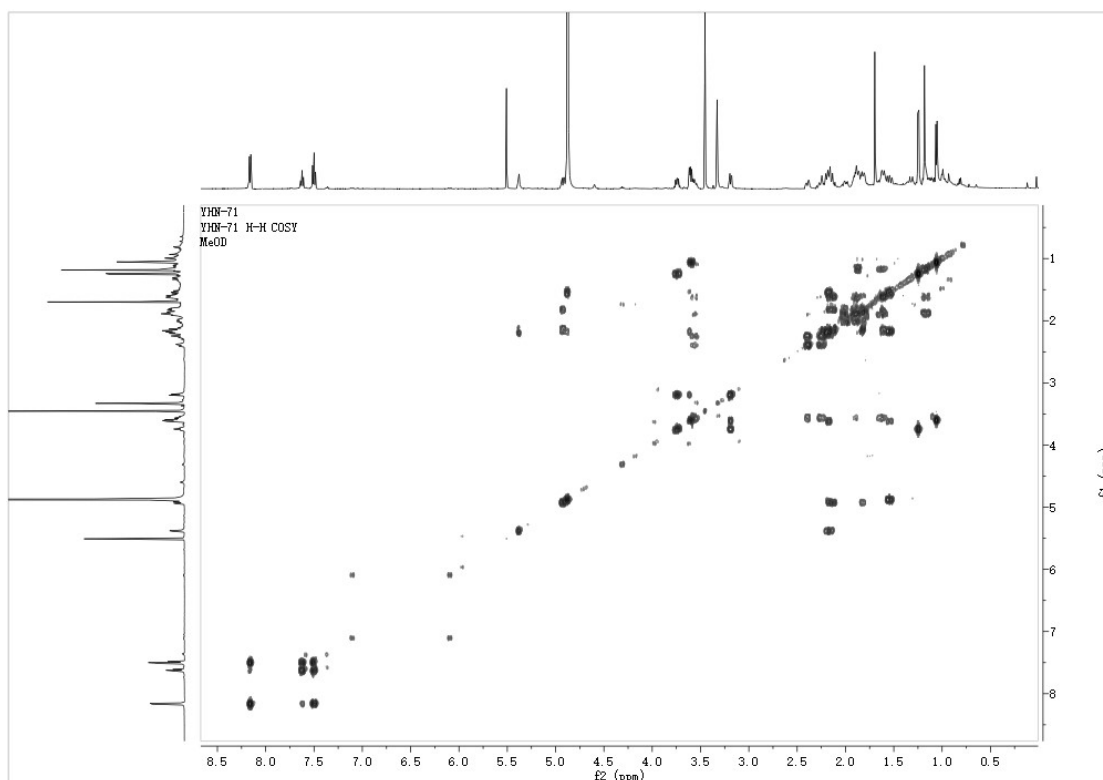

Figure S11.  $^1\text{H}$ - $^1\text{H}$  COSY of **2** in  $\text{CD}_3\text{OD}$

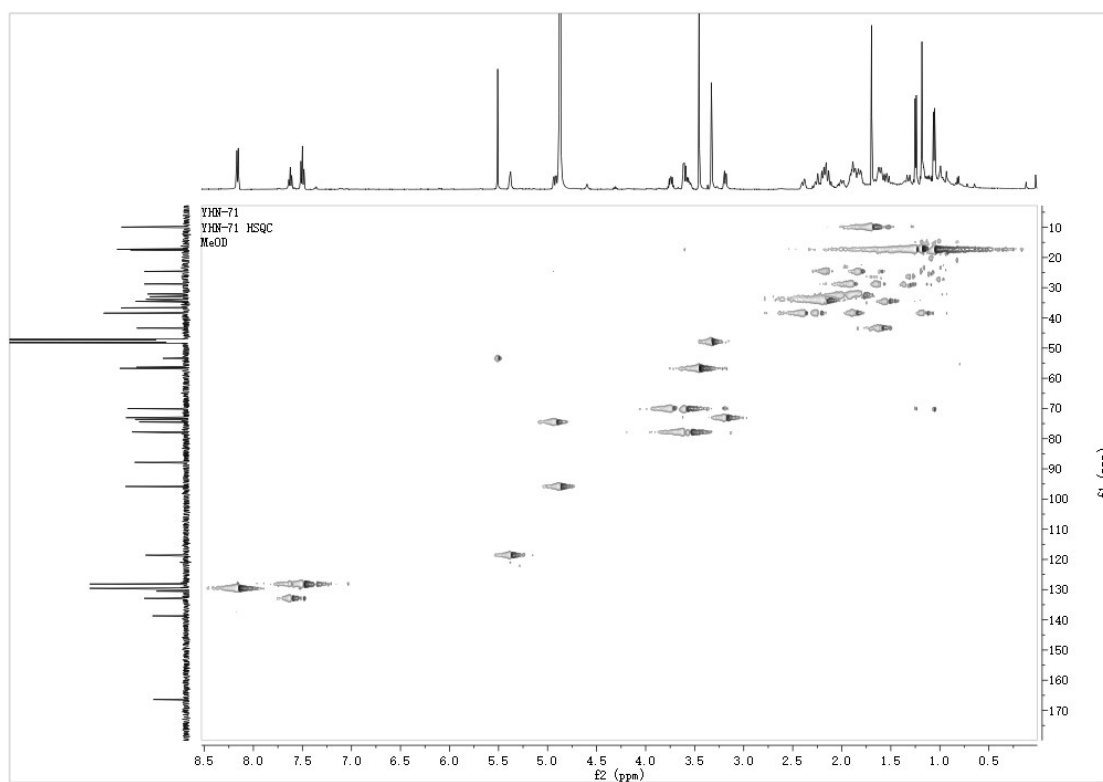

Figure S12. HSQC of **2** in  $\text{CD}_3\text{OD}$

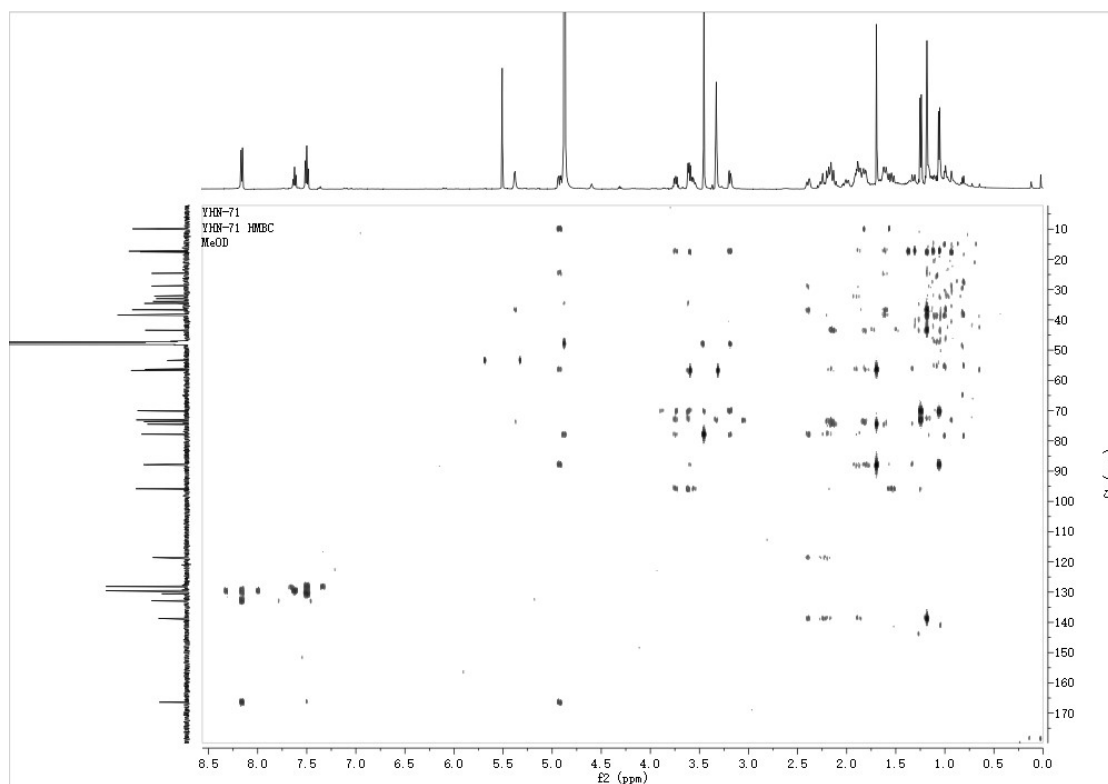

Figure S13. HMBC of **2** in CD<sub>3</sub>OD

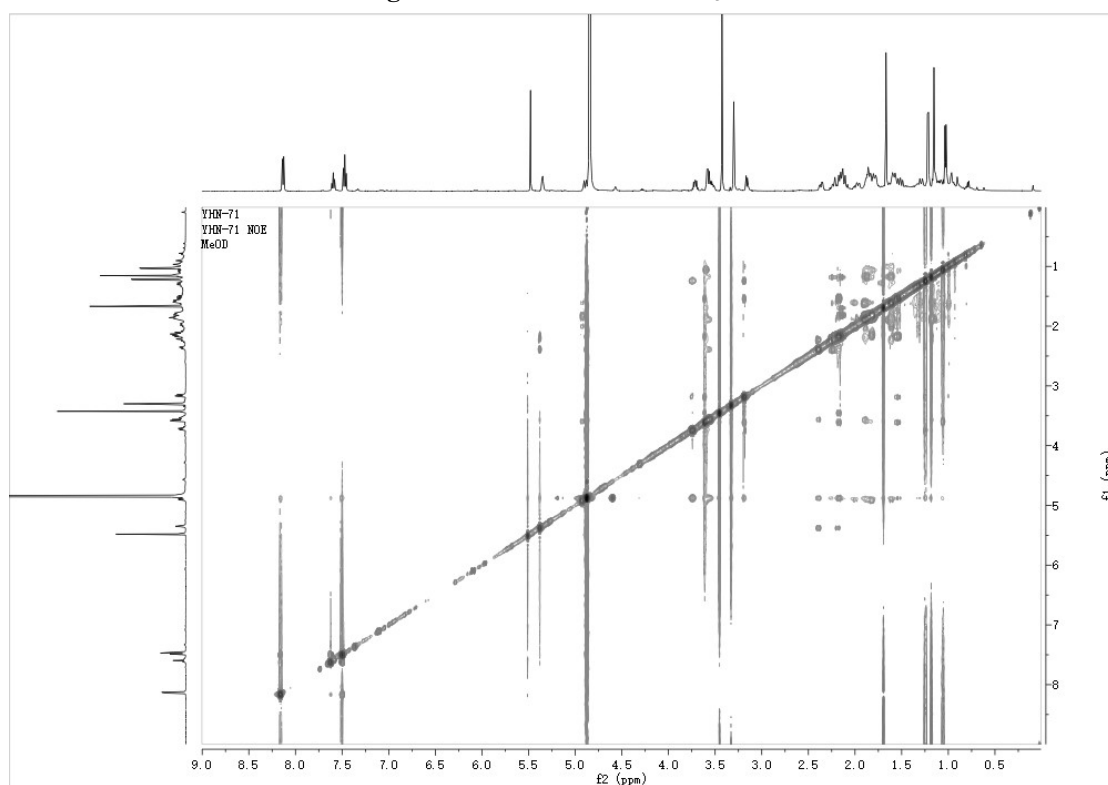

Figure S14. NOESY of **2** in CD<sub>3</sub>OD

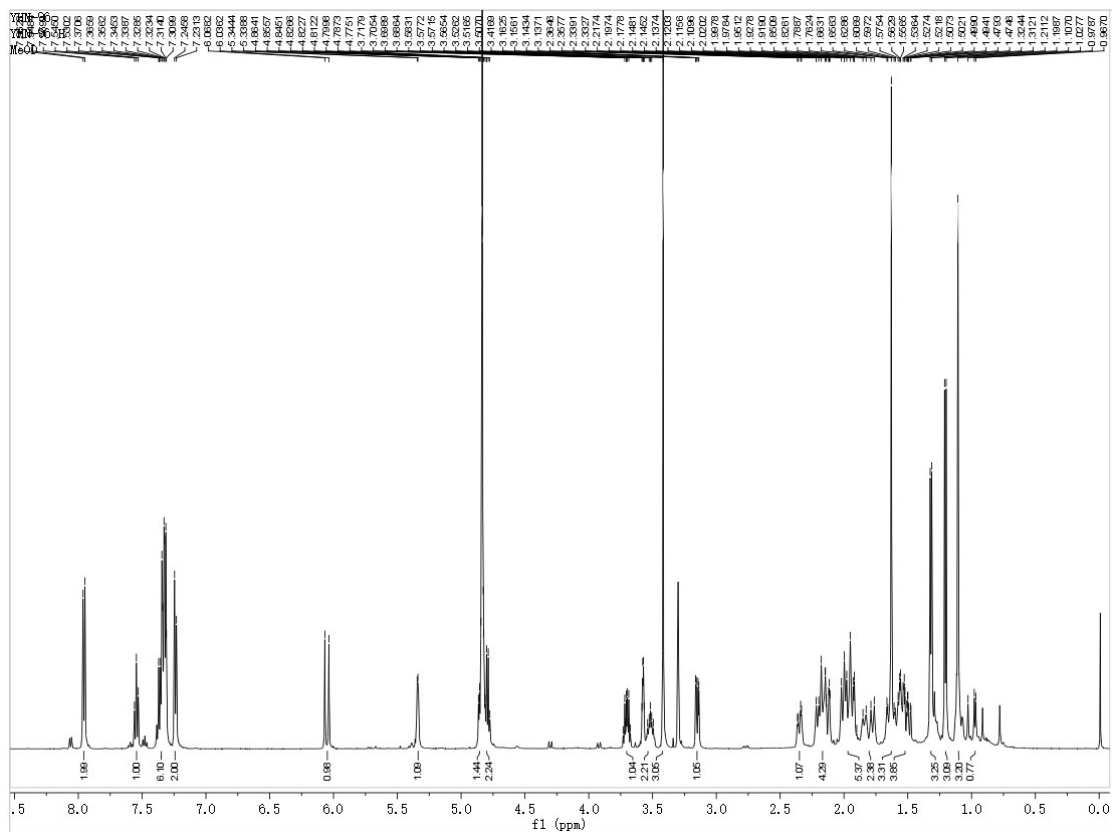

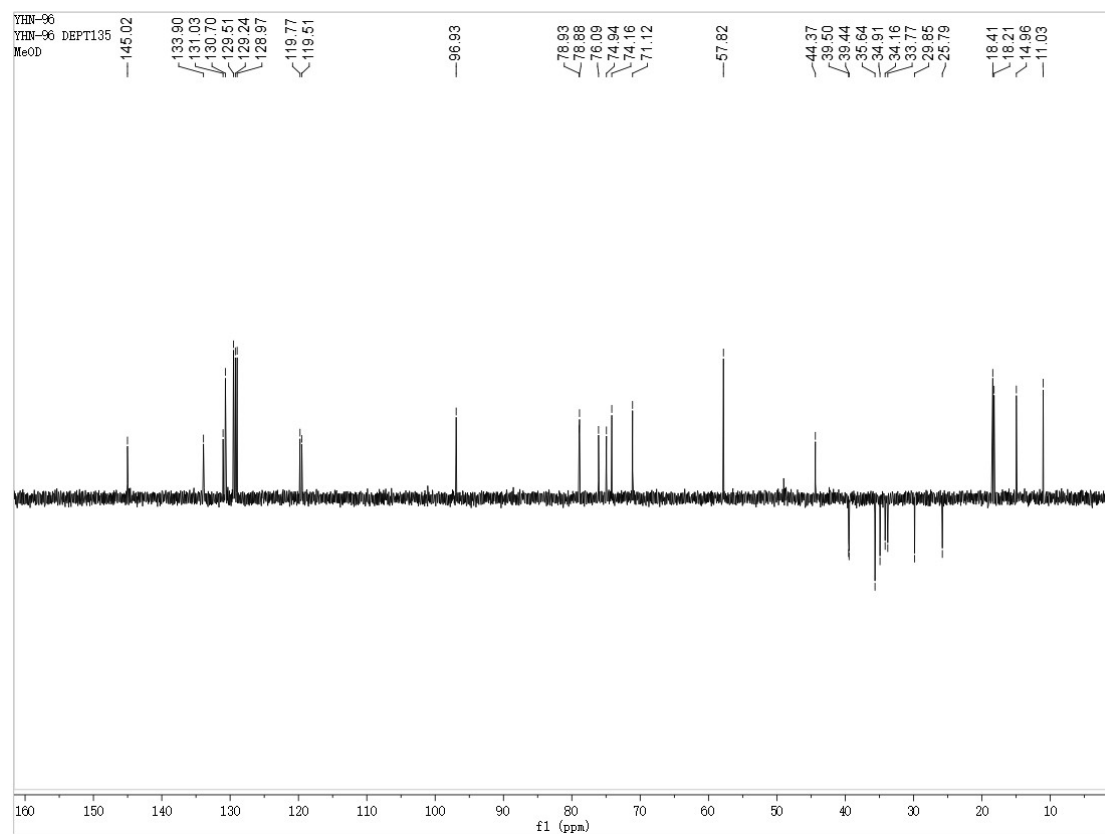

Figure S17. DEPT spectrum of **3** in CD<sub>3</sub>OD

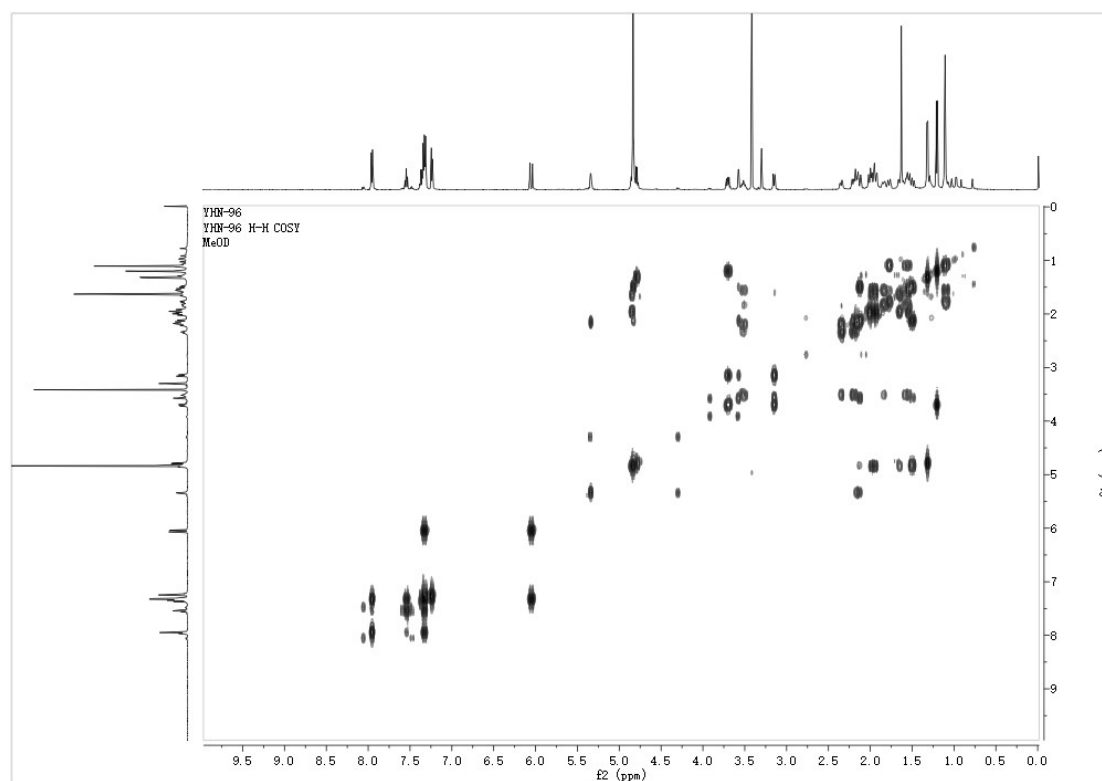

Figure S18. <sup>1</sup>H-<sup>1</sup>H COSY of **3** in CD<sub>3</sub>OD

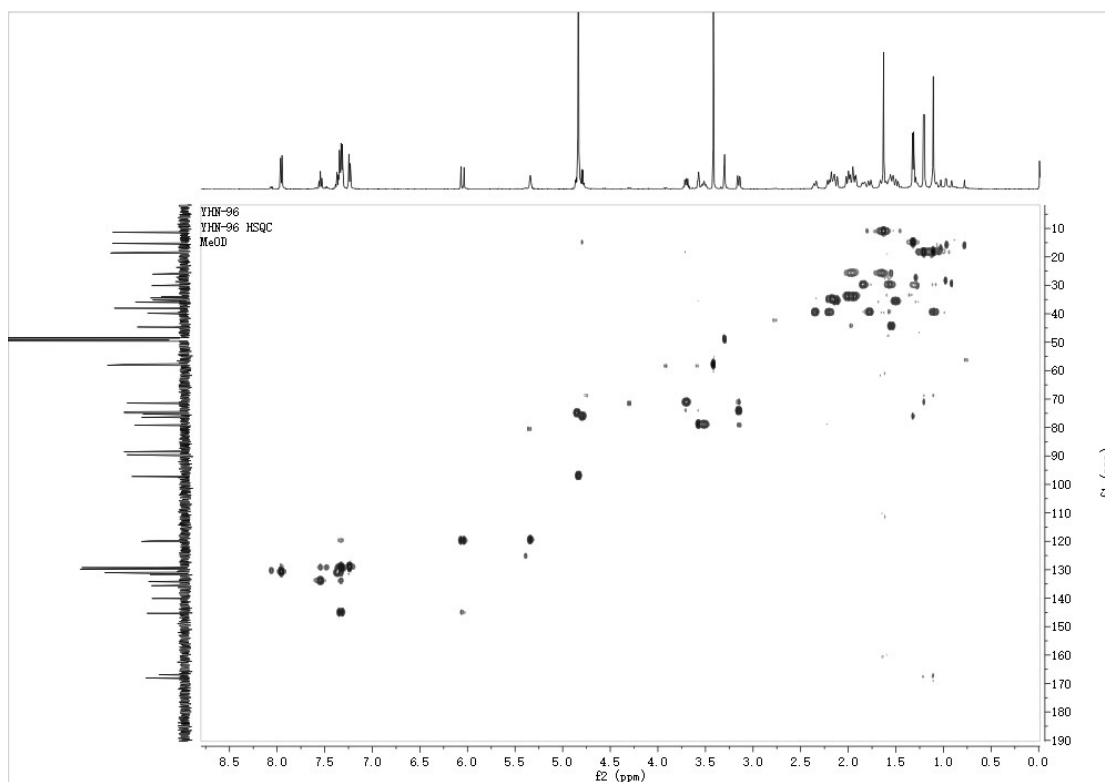

Figure S19. HSQC of 3 in CD<sub>3</sub>OD

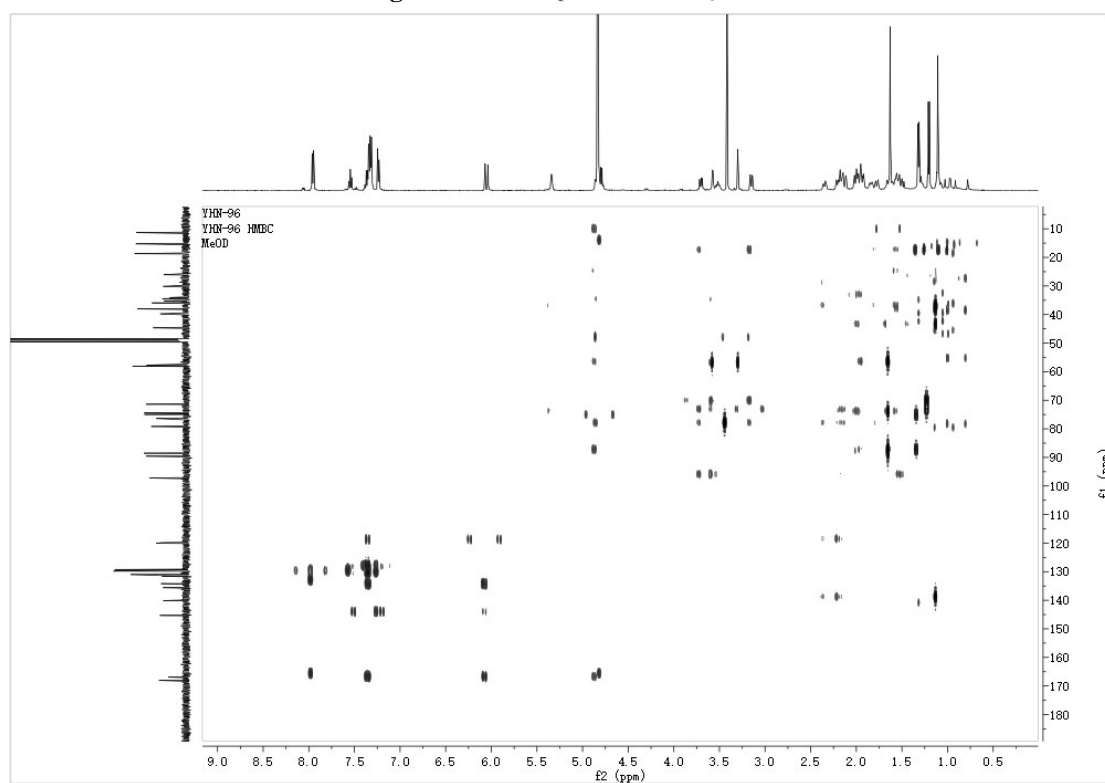

Figure S20. HMBC of 3 in CD<sub>3</sub>OD

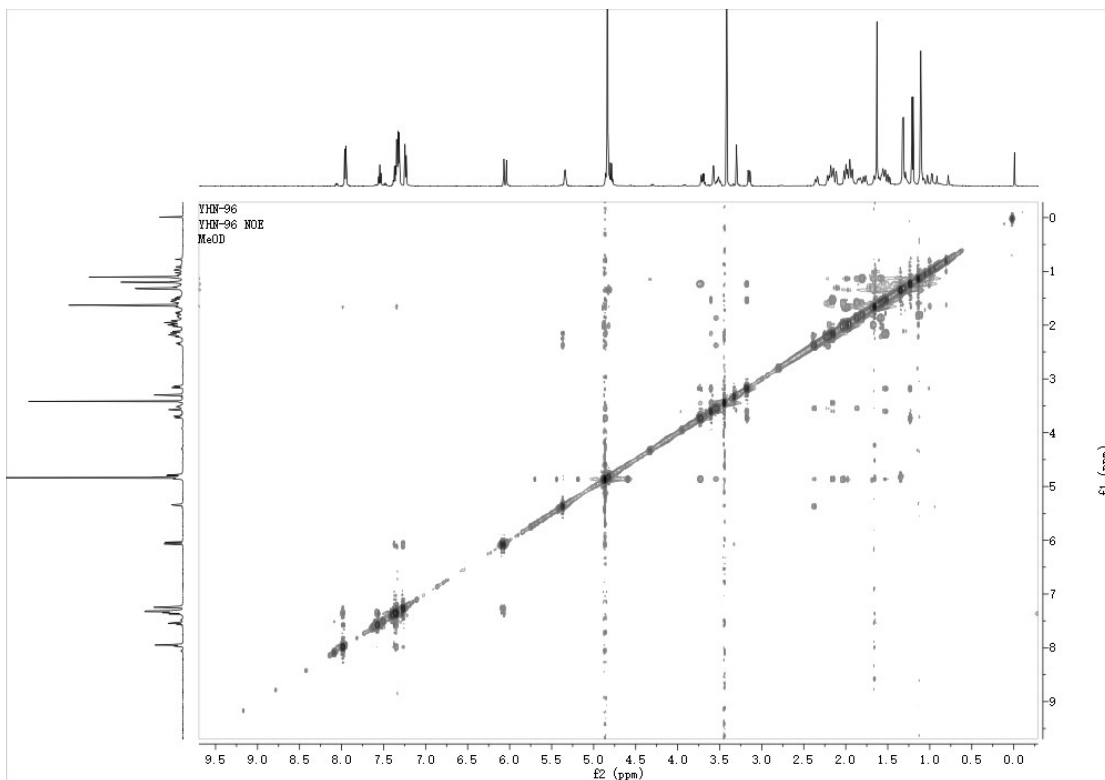

Figure S21. NOESY of 3 in CD<sub>3</sub>OD

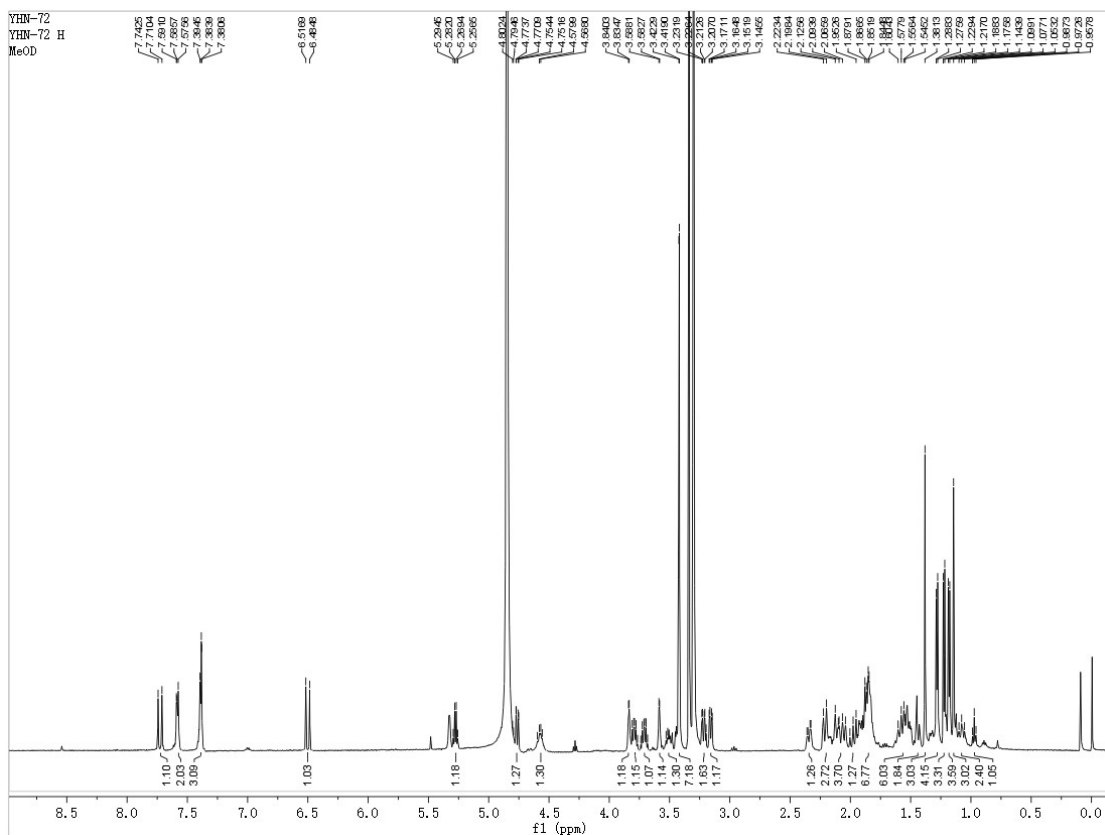

Figure S22. <sup>1</sup>H NMR spectrum (500 MHz) of 4 in CD<sub>3</sub>OD

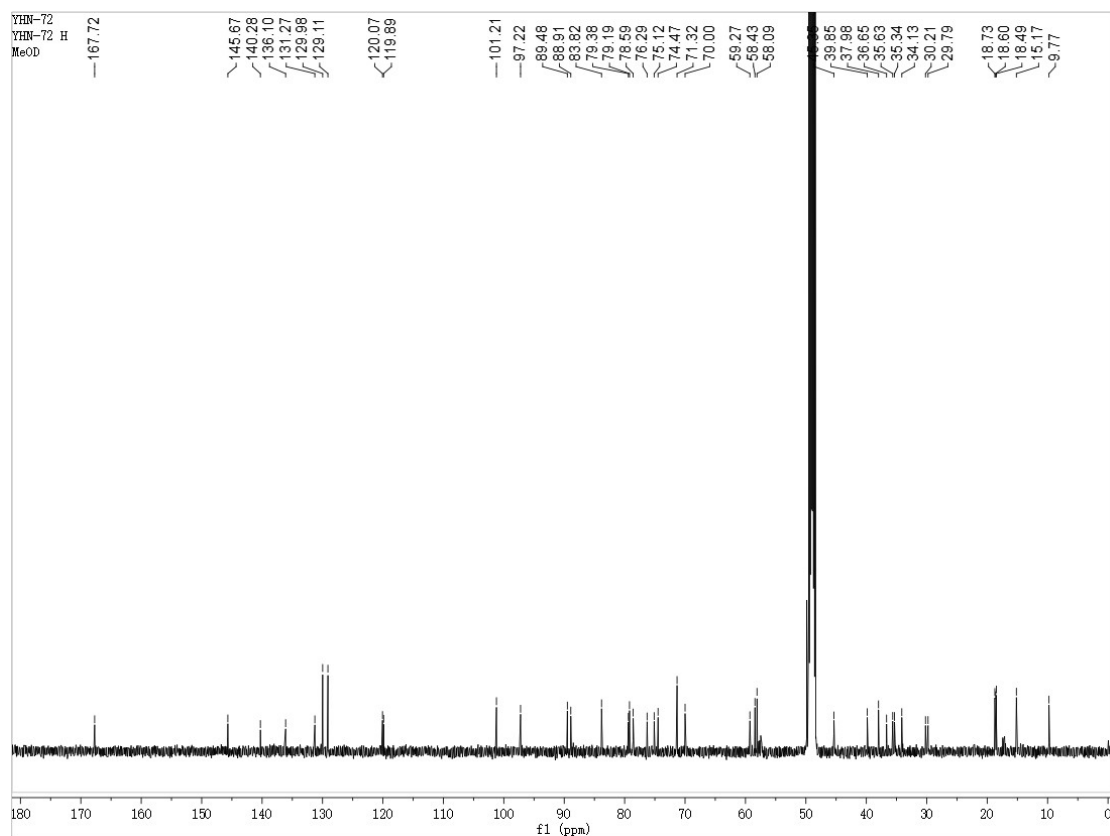

**Figure S23.**  $^{13}\text{C}$  NMR spectrum (125 MHz) of **4** in  $\text{CD}_3\text{OD}$

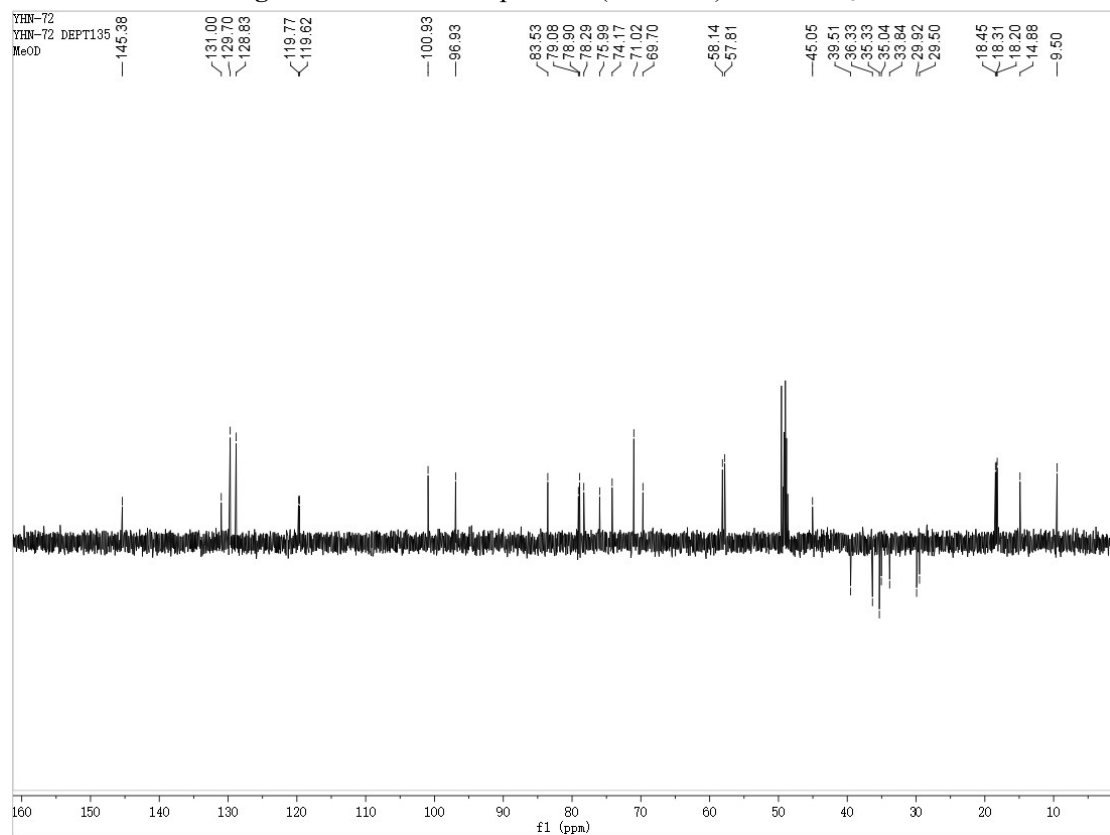

**Figure S24.** DEPT spectrum of **4** in  $\text{CD}_3\text{OD}$



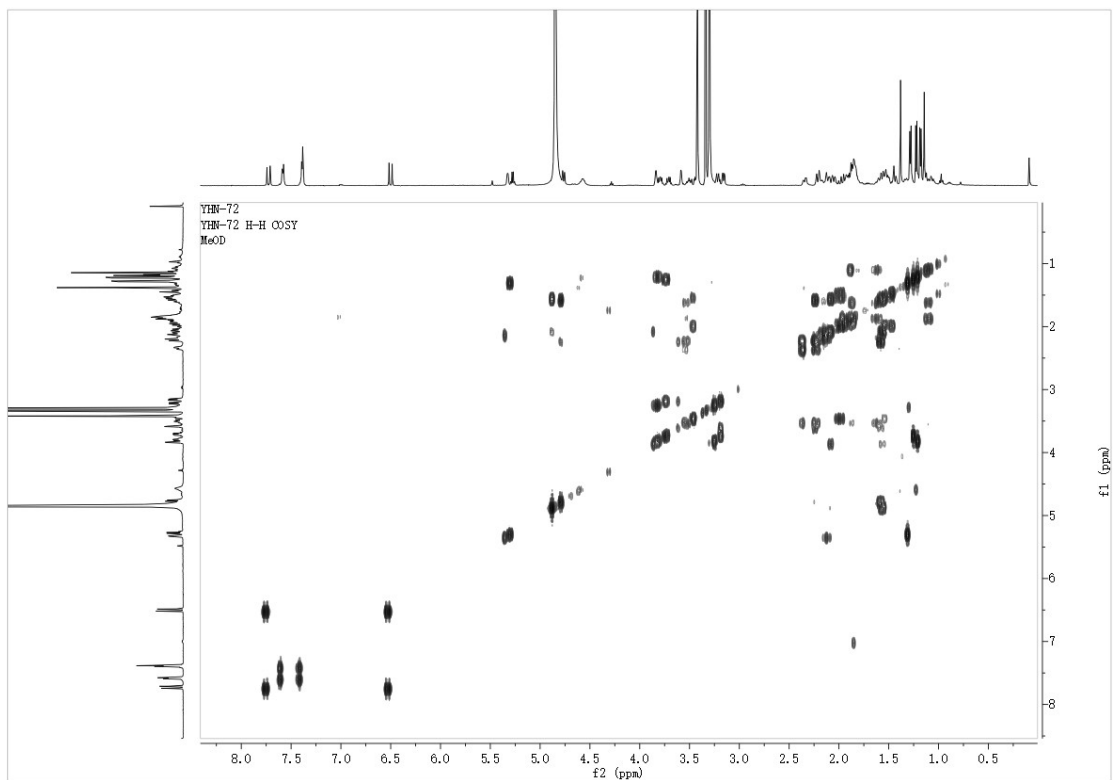

Figure S25.  $^1\text{H}$ - $^1\text{H}$  COSY of **4** in  $\text{CD}_3\text{OD}$

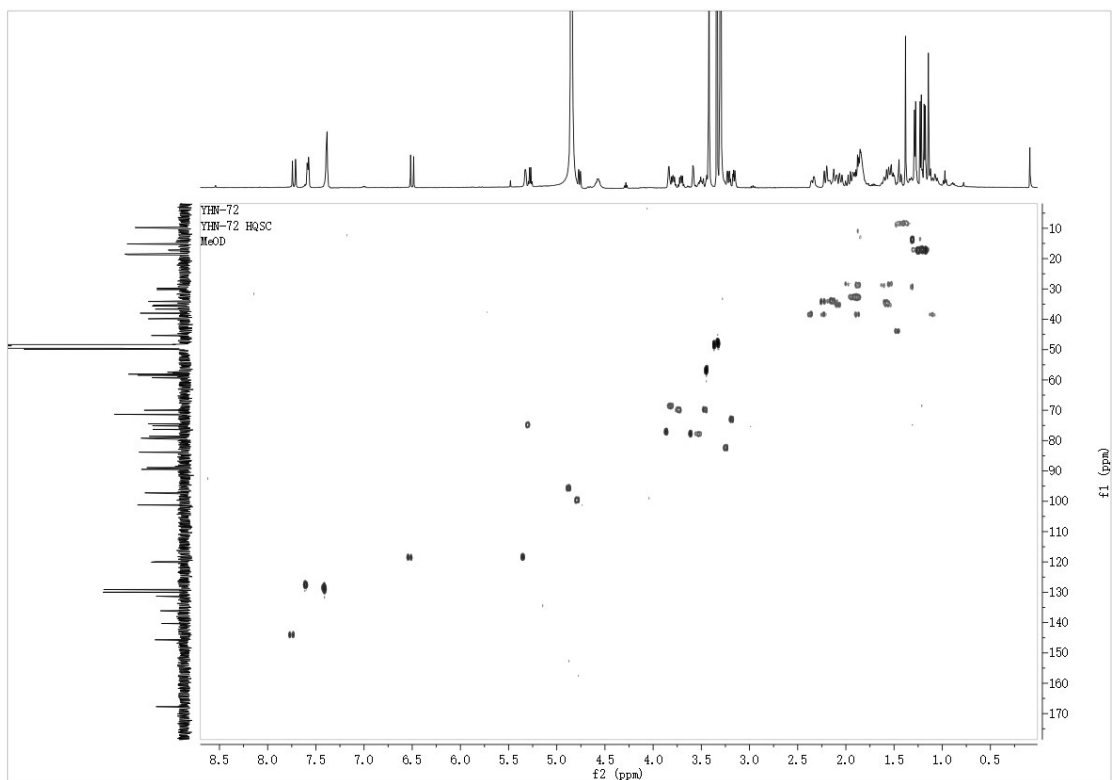

Figure S26. HSQC of **4** in  $\text{CD}_3\text{OD}$

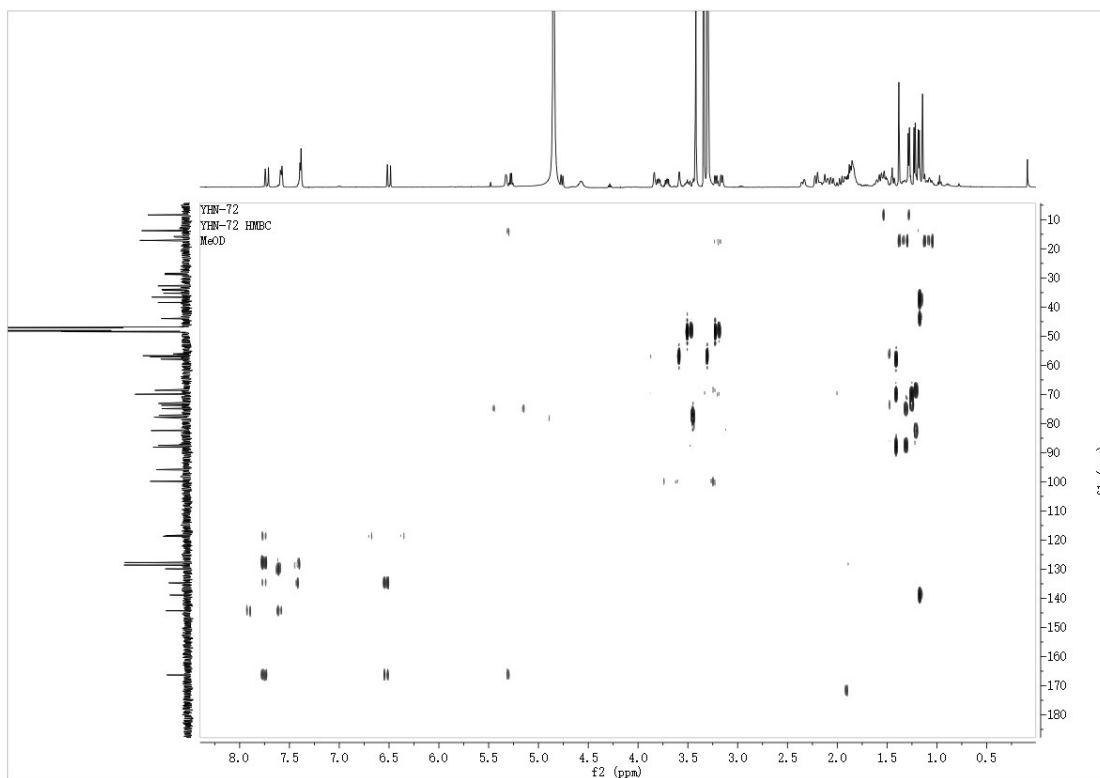

Figure S27. HMBC of 4 in CD<sub>3</sub>OD

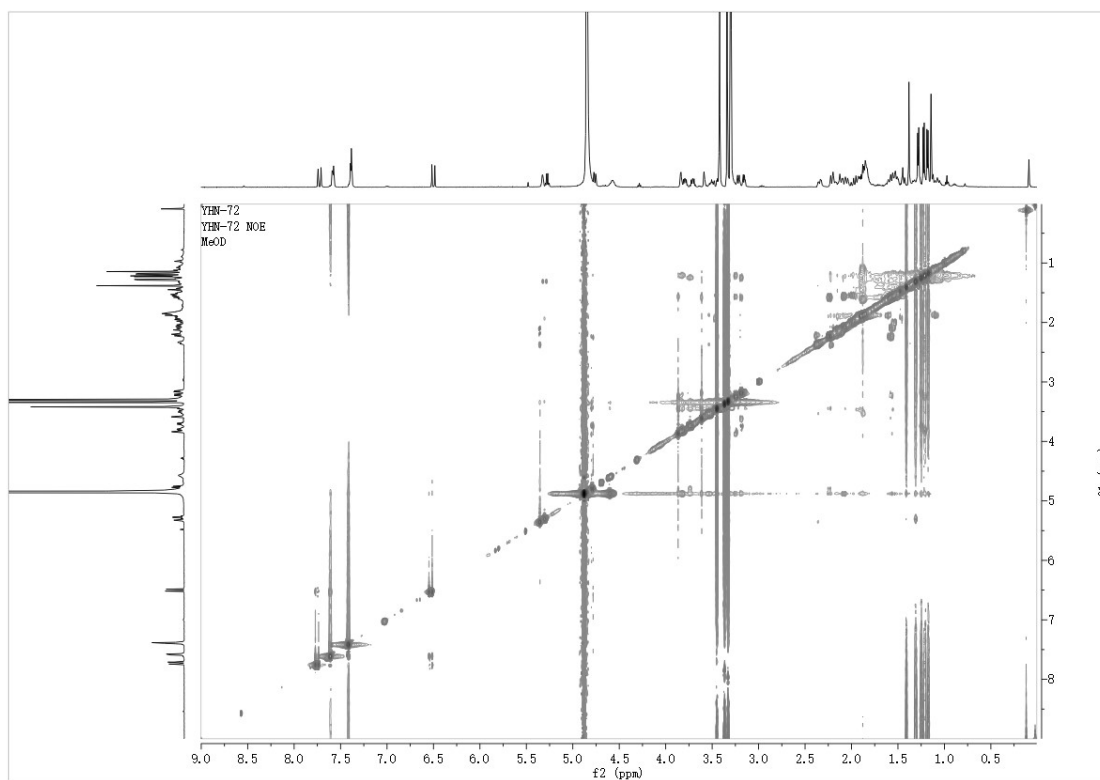

Figure S28. NOESY of 4 in CD<sub>3</sub>OD

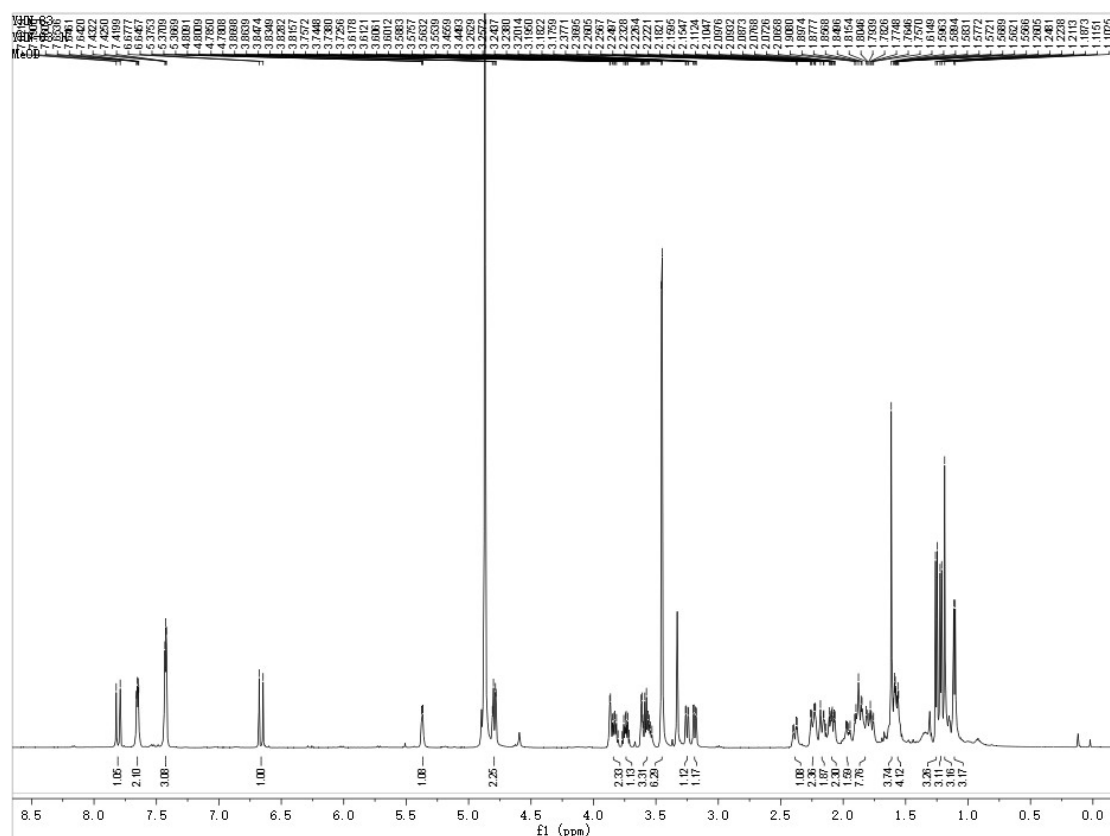

Figure S29.  $^1\text{H}$  NMR spectrum (500 MHz) of **5** in  $\text{CD}_3\text{OD}$

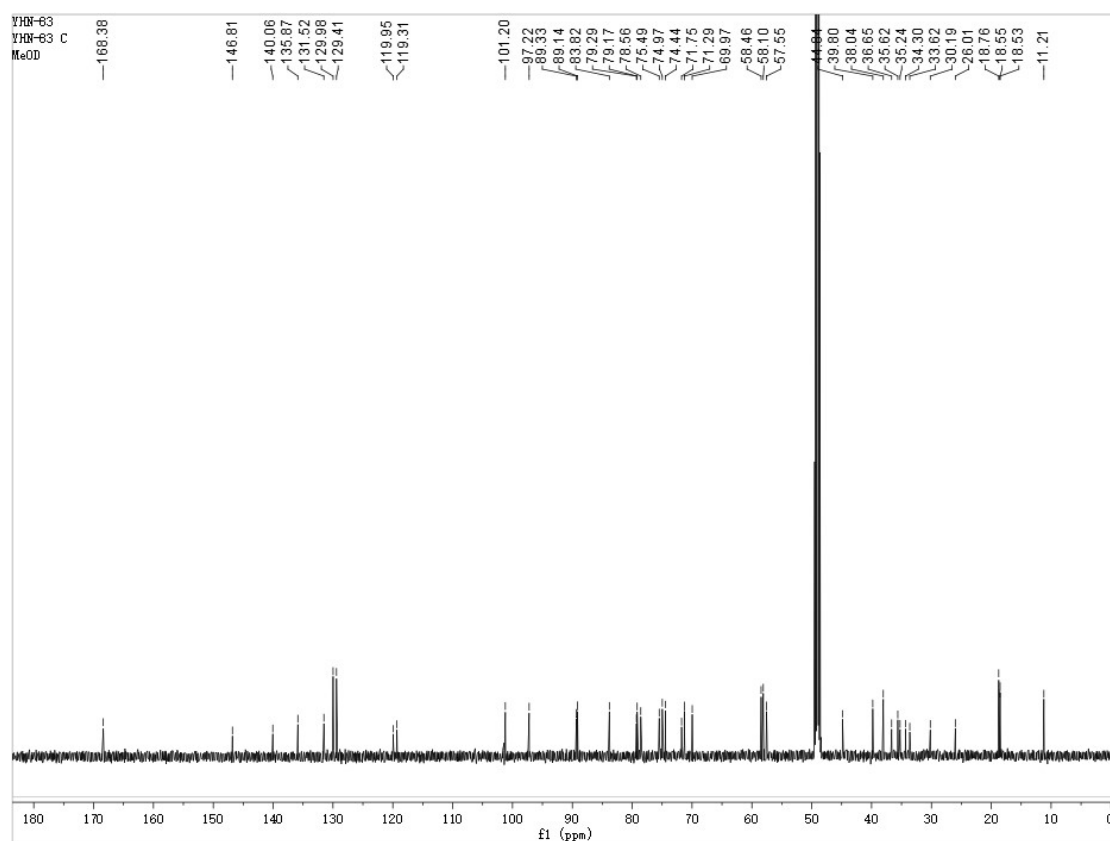

Figure S30.  $^{13}\text{C}$  NMR spectrum (125 MHz) of **5** in  $\text{CD}_3\text{OD}$

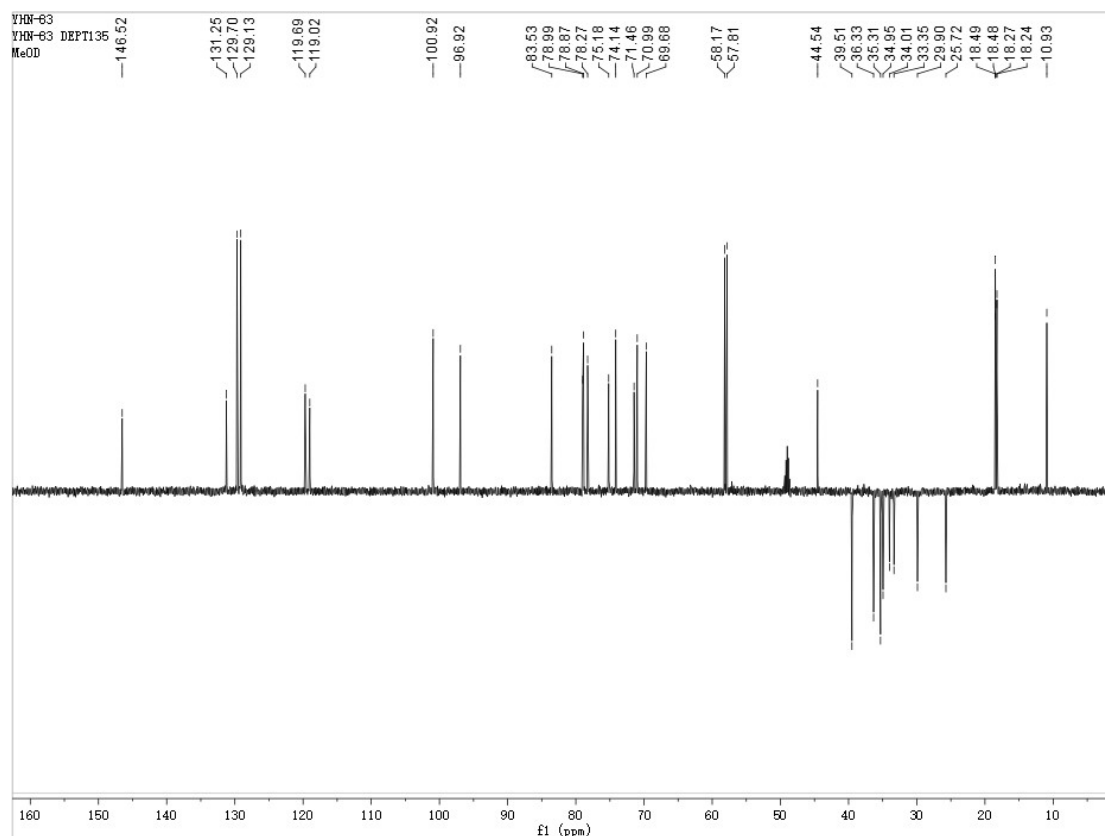

Figure S31. DEPT spectrum of **5** in CD<sub>3</sub>OD

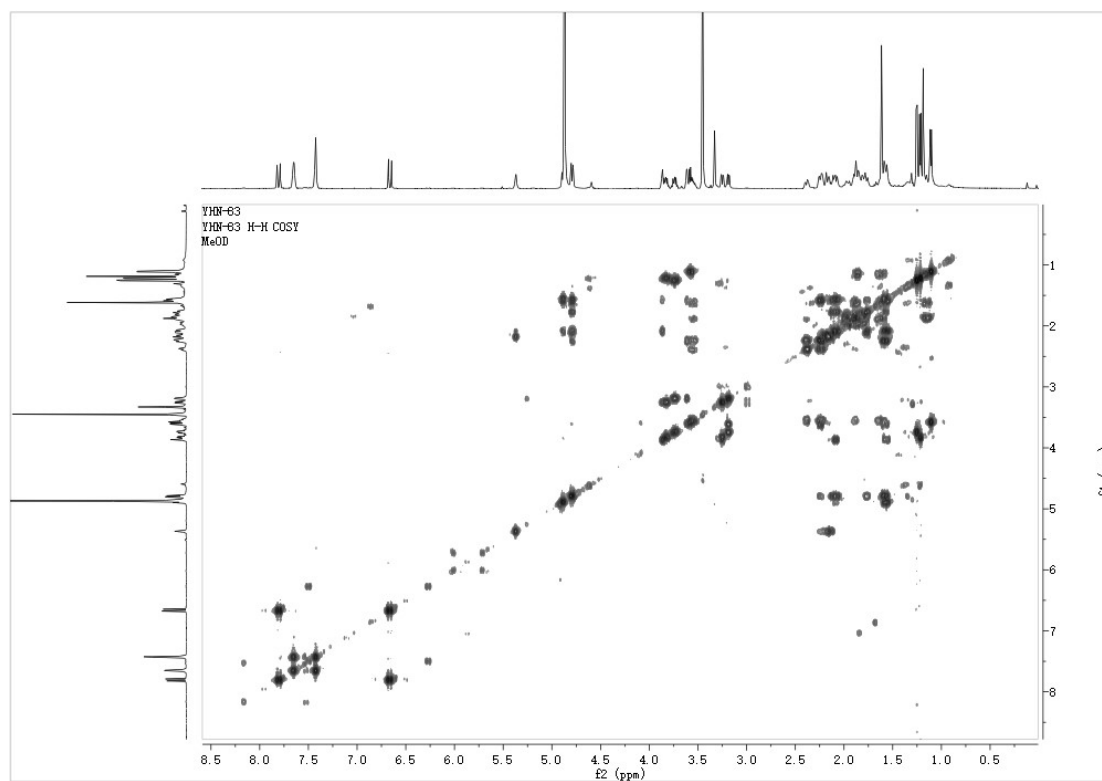

Figure S32. <sup>1</sup>H-<sup>1</sup>H COSY of **5** in CD<sub>3</sub>OD

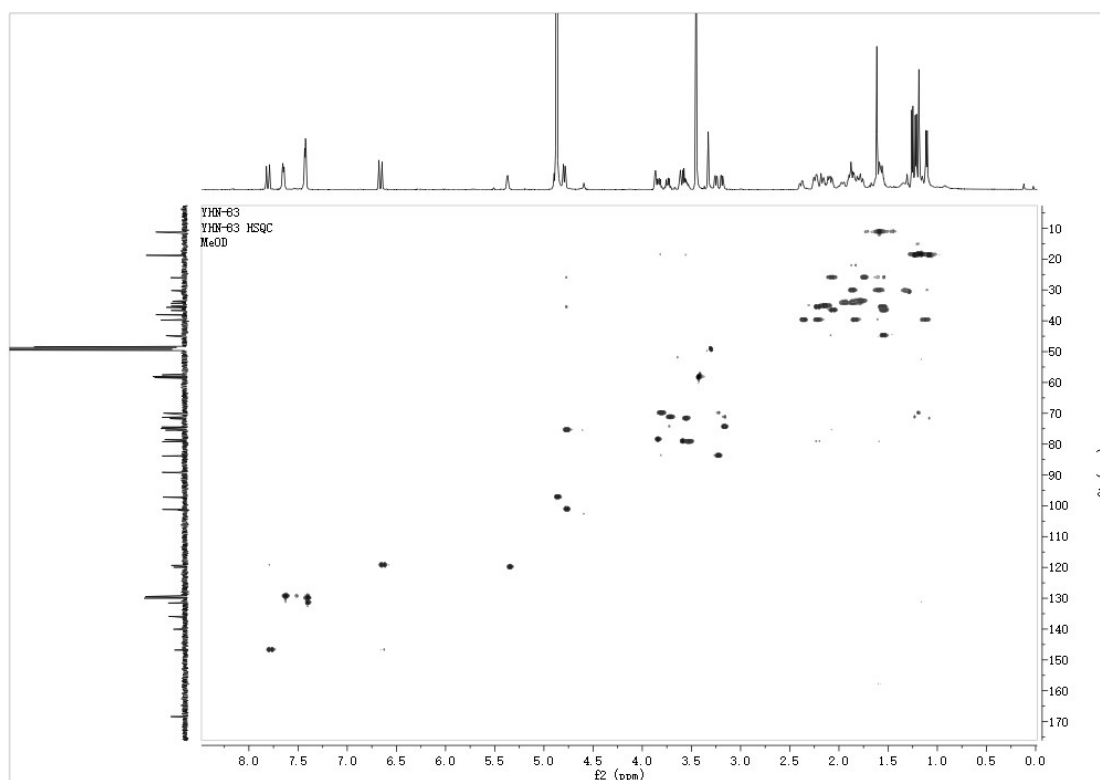

Figure S33. HSQC of 5 in CD<sub>3</sub>OD

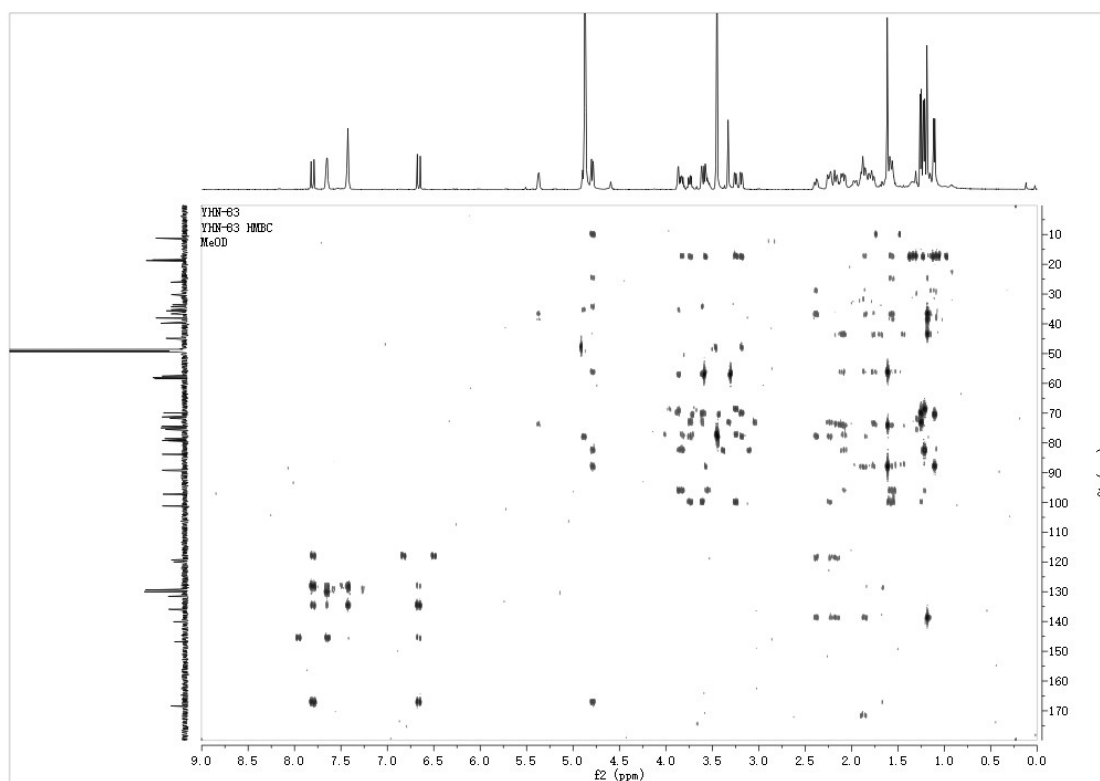

Figure S34. HMBC of 5 in CD<sub>3</sub>OD



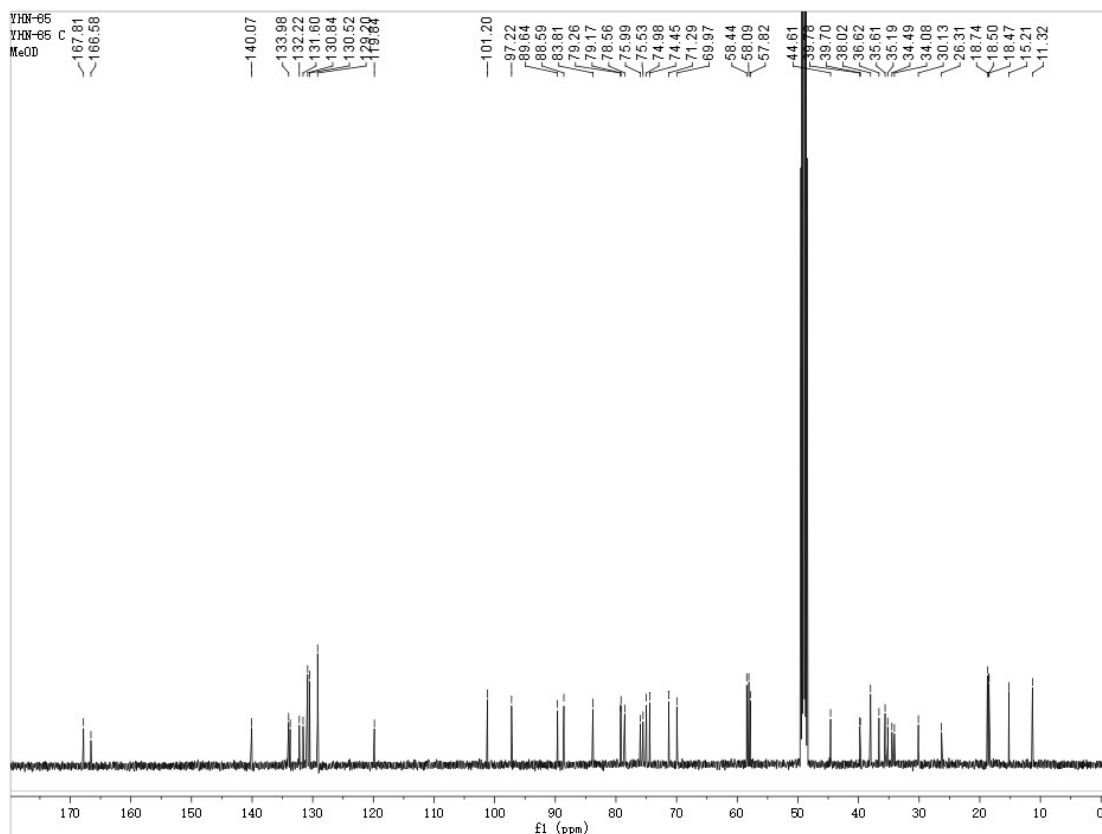

Figure S37.  $^{13}\text{C}$  NMR spectrum (125 MHz) of **6** in  $\text{CD}_3\text{OD}$

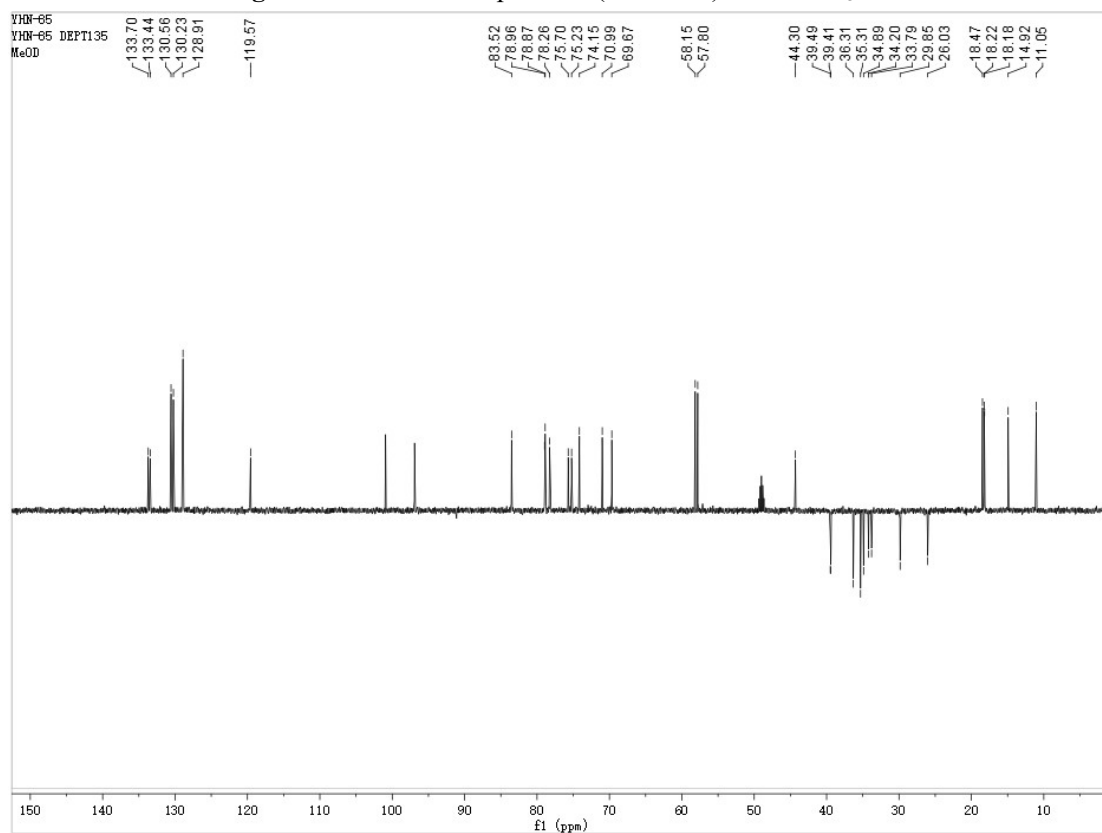

Figure S38. DEPT spectrum of **6** in  $\text{CD}_3\text{OD}$

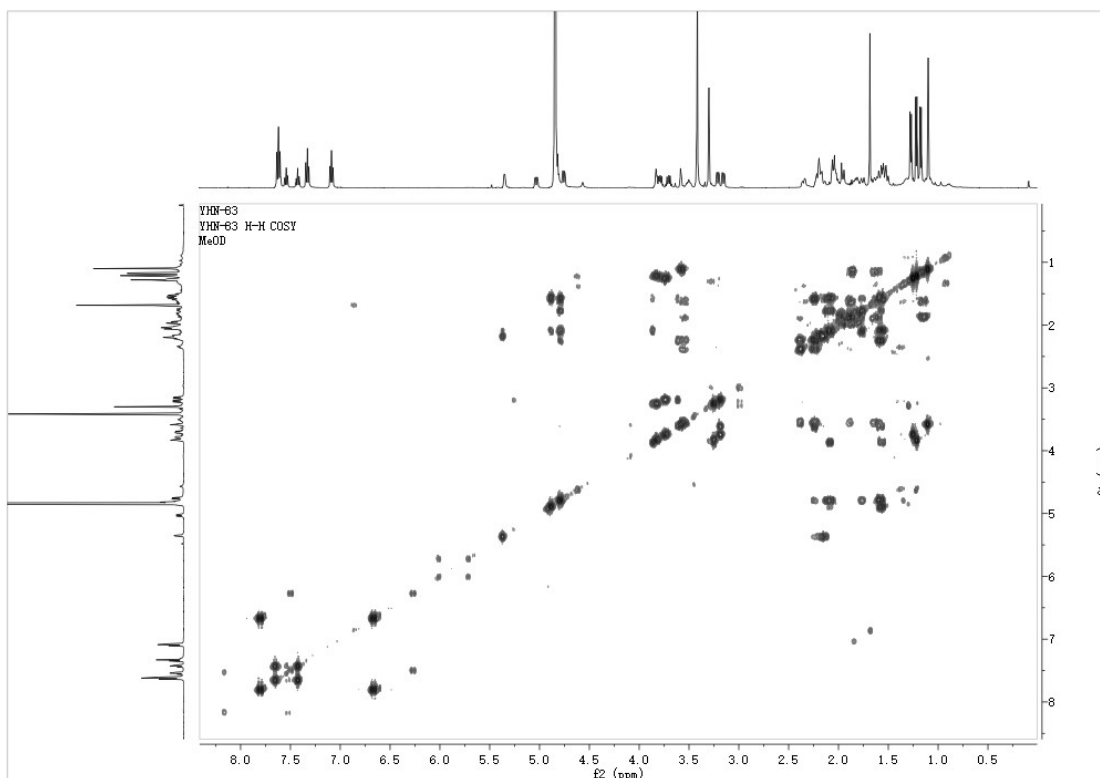

Figure S39.  $^1\text{H}$ - $^1\text{H}$  COSY of **6** in  $\text{CD}_3\text{OD}$

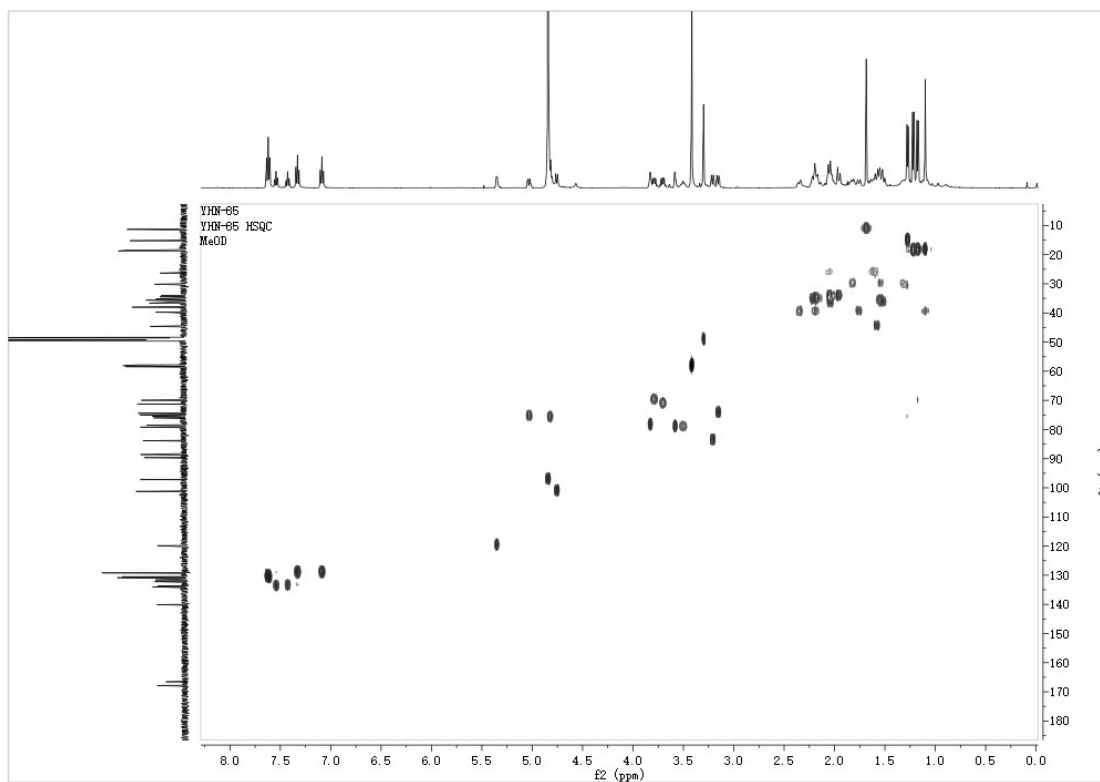

Figure S40. HSQC of **6** in  $\text{CD}_3\text{OD}$



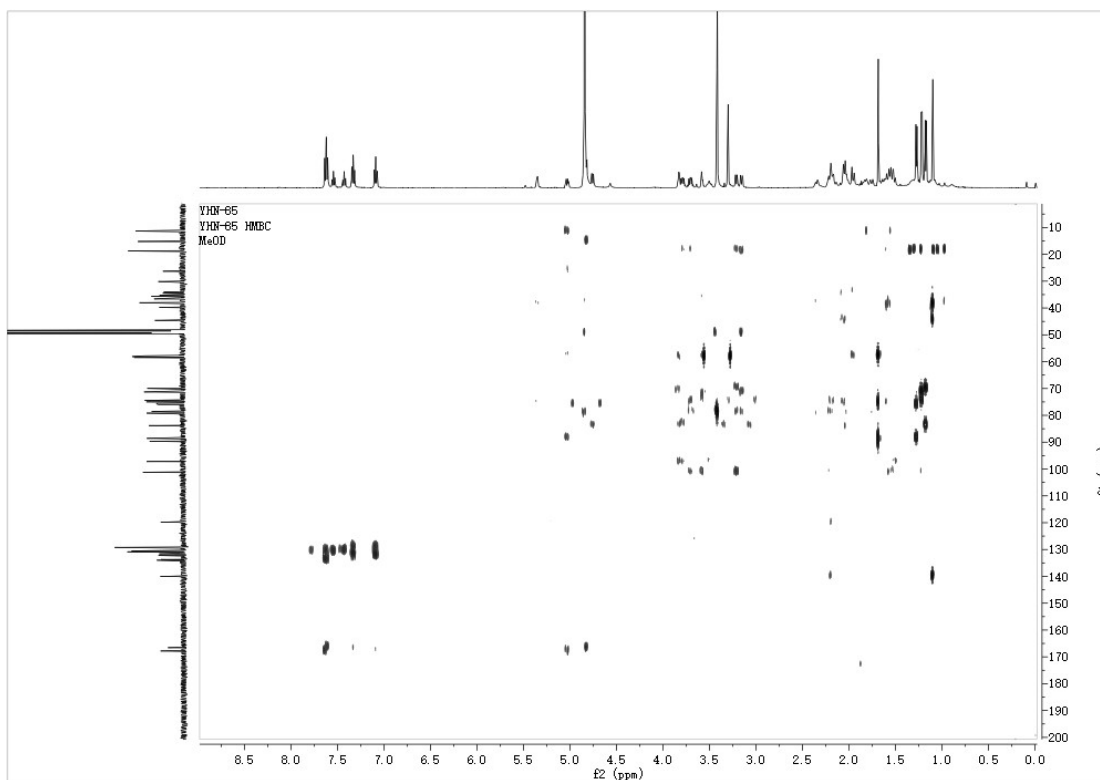

Figure S41. HMBC of 6 in CD<sub>3</sub>OD

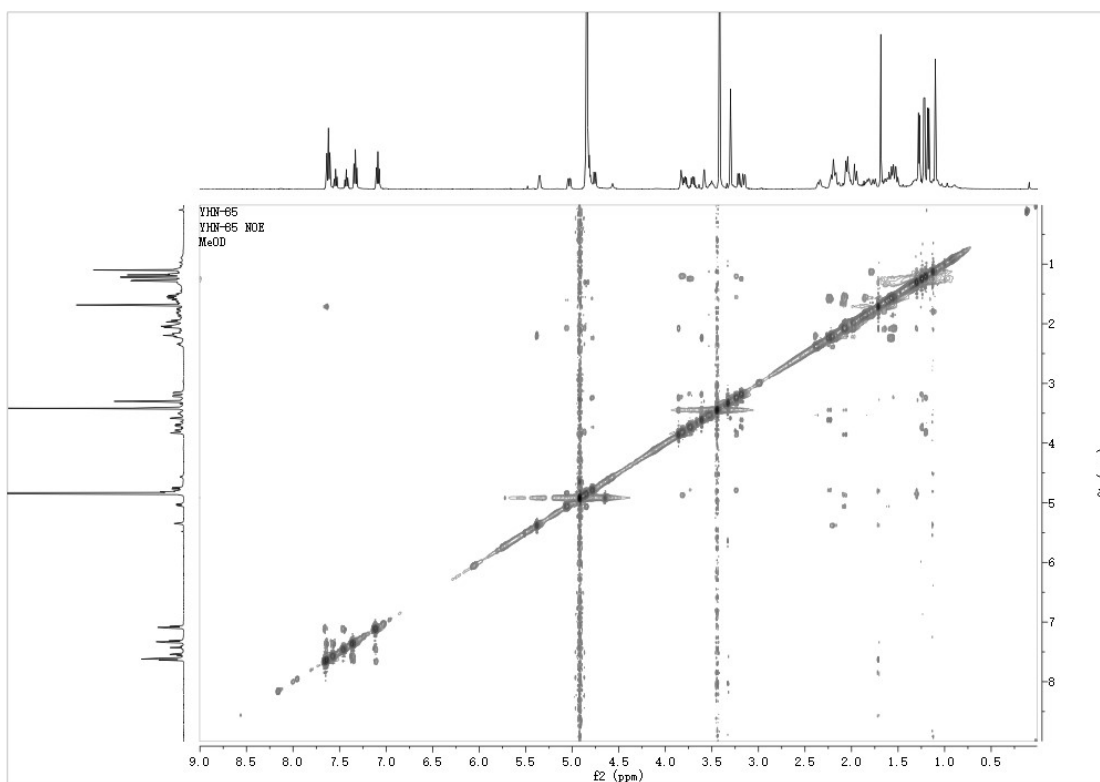

Figure S42. NOESY of 6 in CD<sub>3</sub>OD

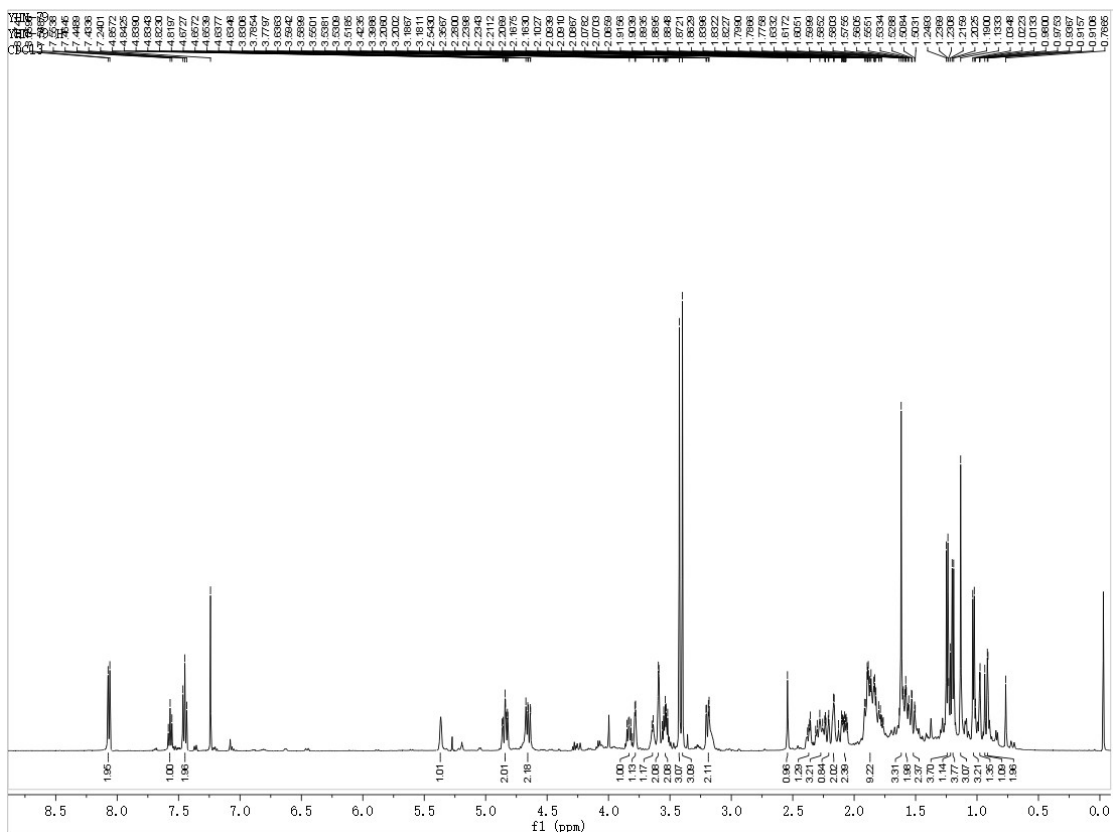

Figure S43.  $^1\text{H}$  NMR spectrum (500 MHz) of **7** in  $\text{CDCl}_3$

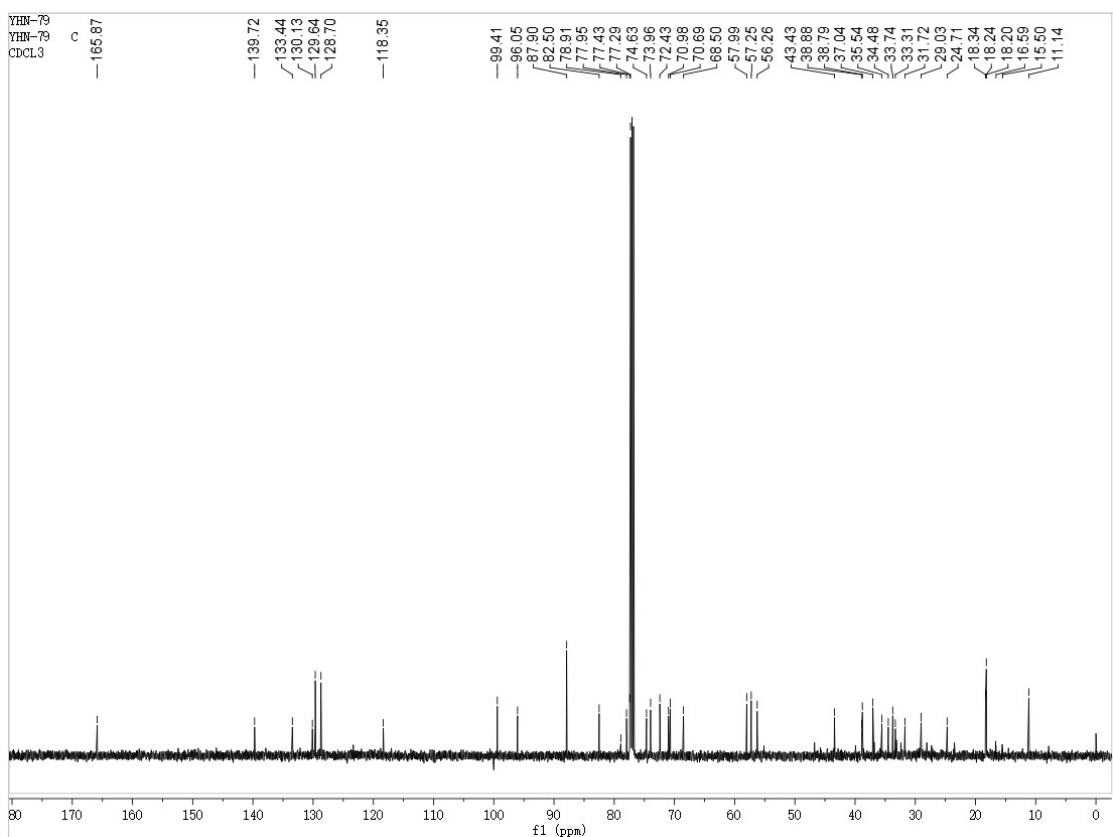

Figure S44.  $^{13}\text{C}$  NMR spectrum (125 MHz) of **7** in  $\text{CDCl}_3$

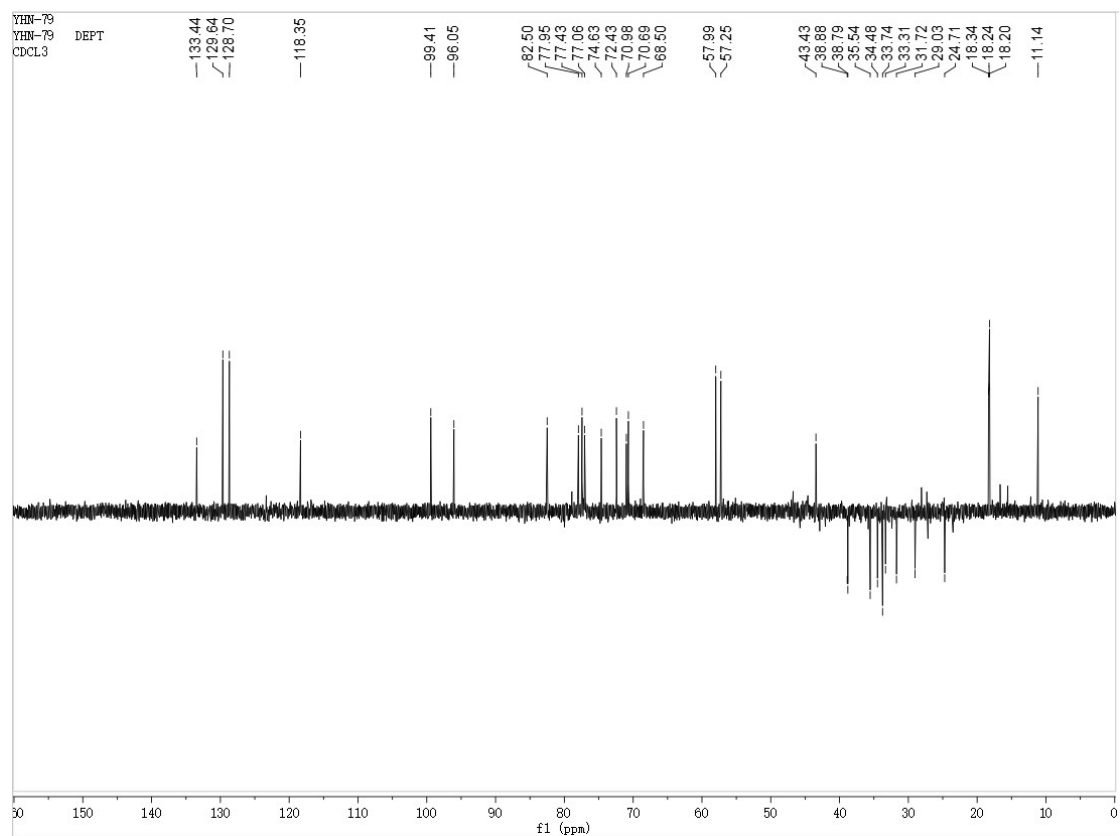

Figure S45. DEPT spectrum of **7** in CDCl<sub>3</sub>

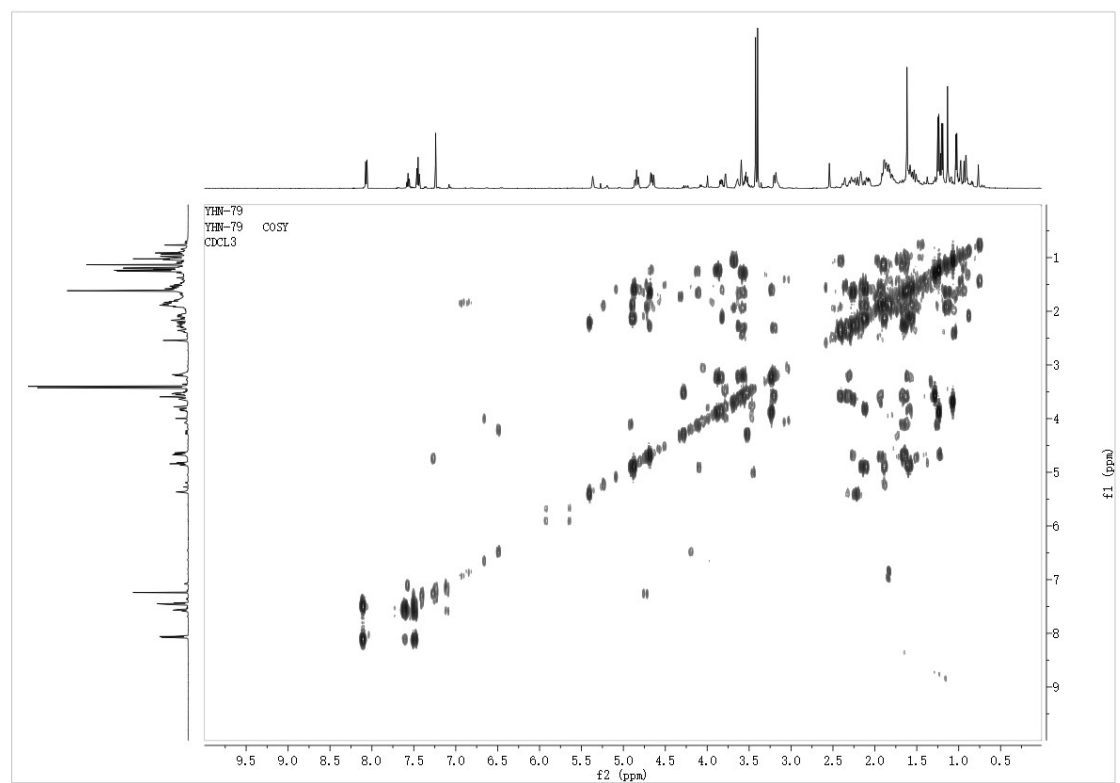

Figure S46. <sup>1</sup>H-<sup>1</sup>H COSY of **7** in CDCl<sub>3</sub>

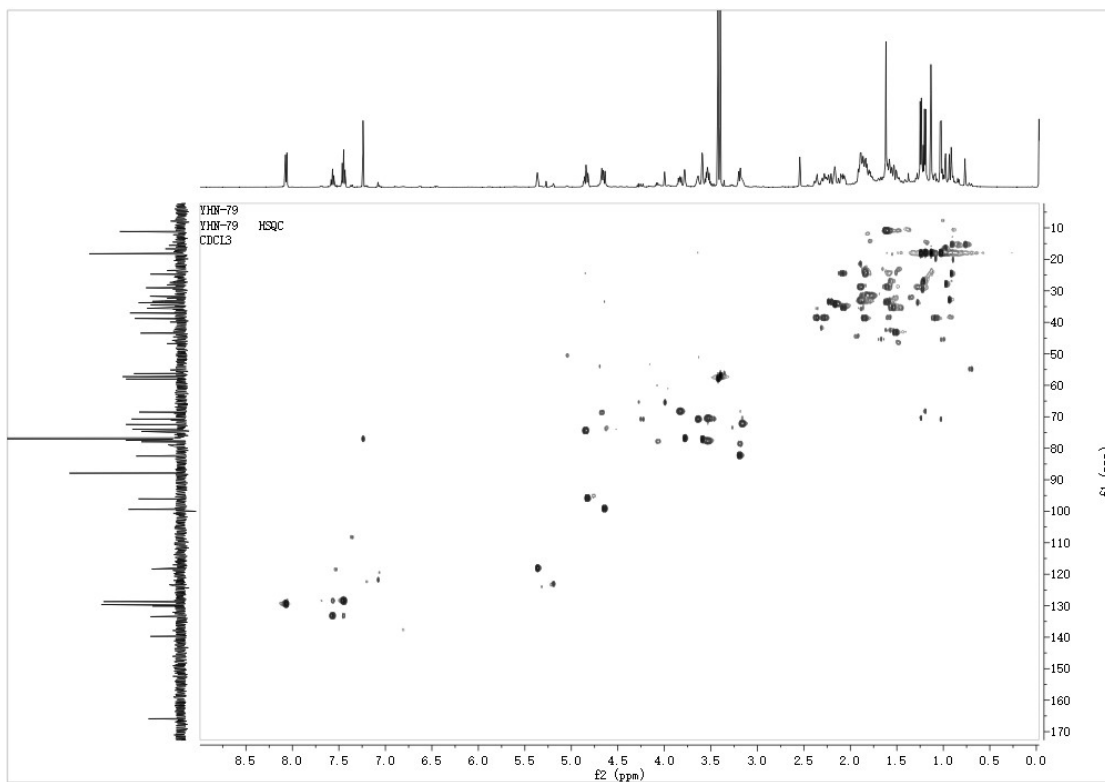

Figure S47. HSQC of 7 in CDCl<sub>3</sub>

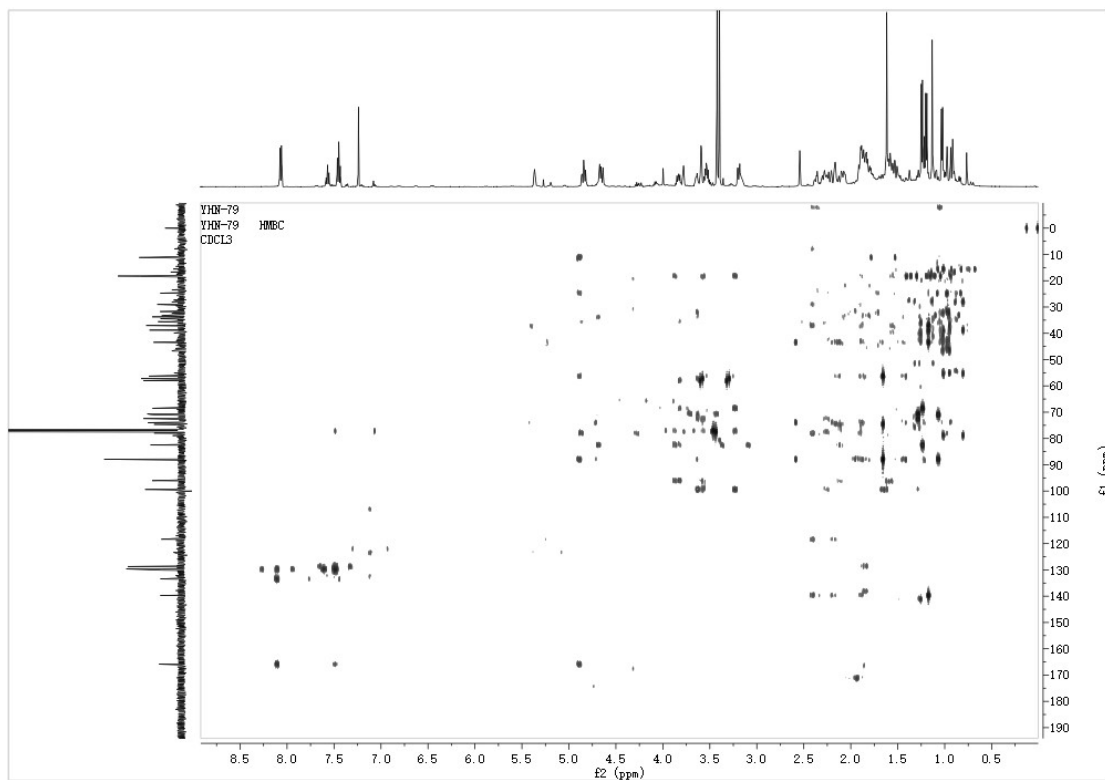

Figure S48. HMBC of 7 in CDCl<sub>3</sub>



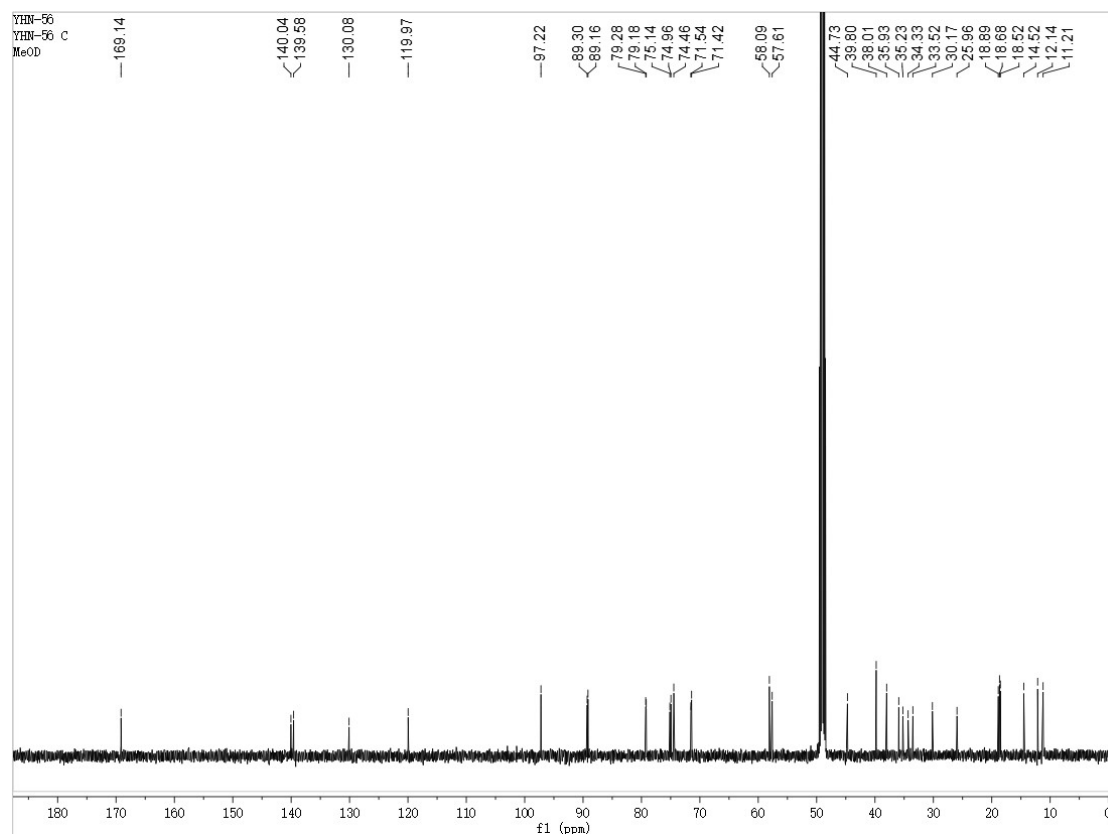

Figure S51.  $^{13}\text{C}$  NMR spectrum (125 MHz) of **8** in  $\text{CD}_3\text{OD}$

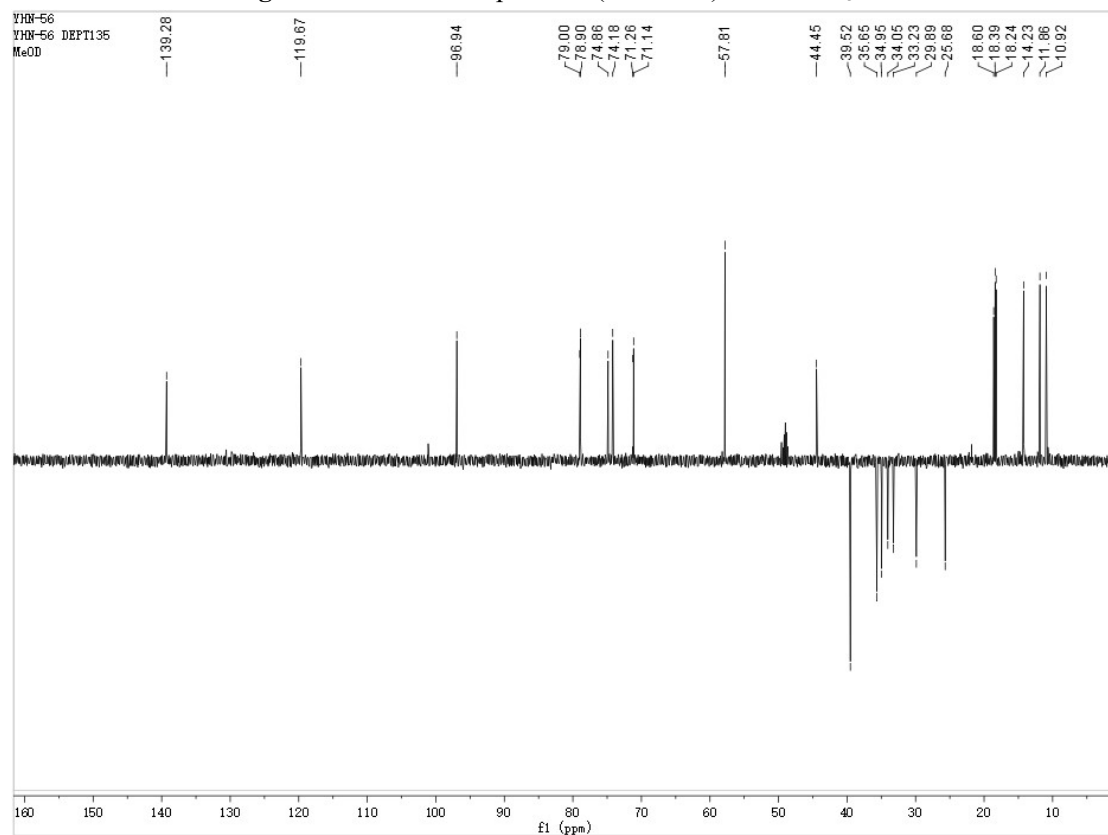

Figure S52. DEPT spectrum (125 MHz) of **8** in  $\text{CD}_3\text{OD}$

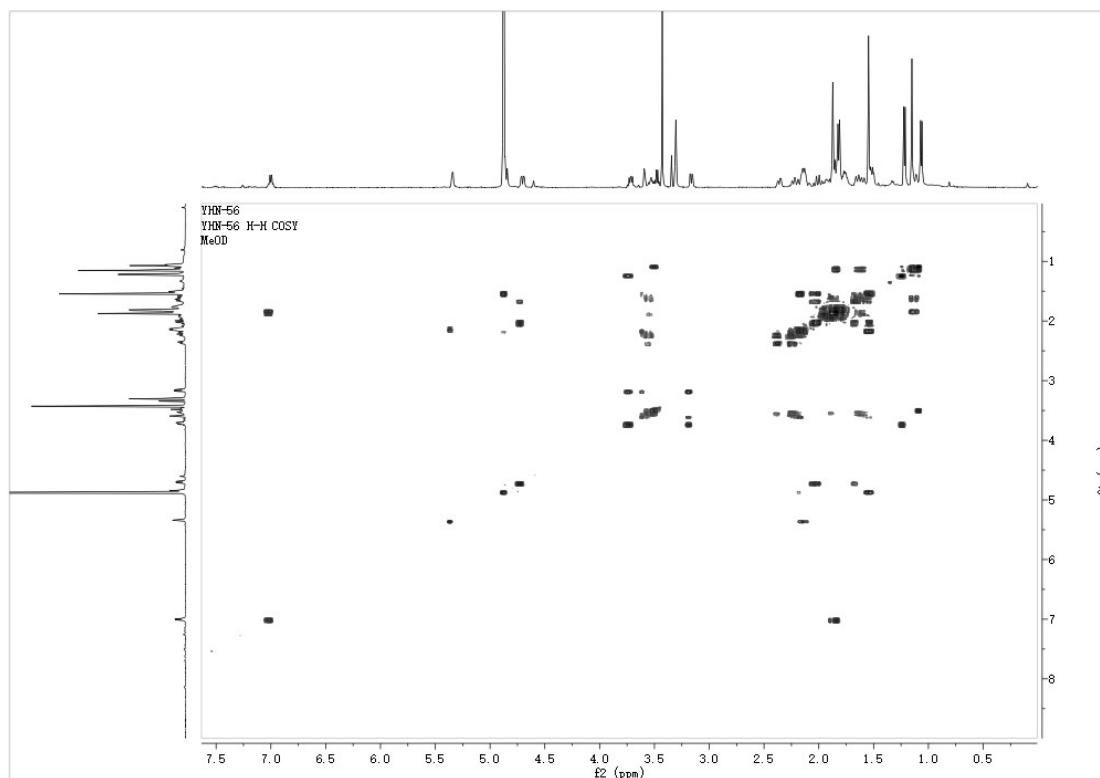

**Figure S53.**  $^1\text{H}$ - $^1\text{H}$  COSY of **8** in  $\text{CD}_3\text{OD}$

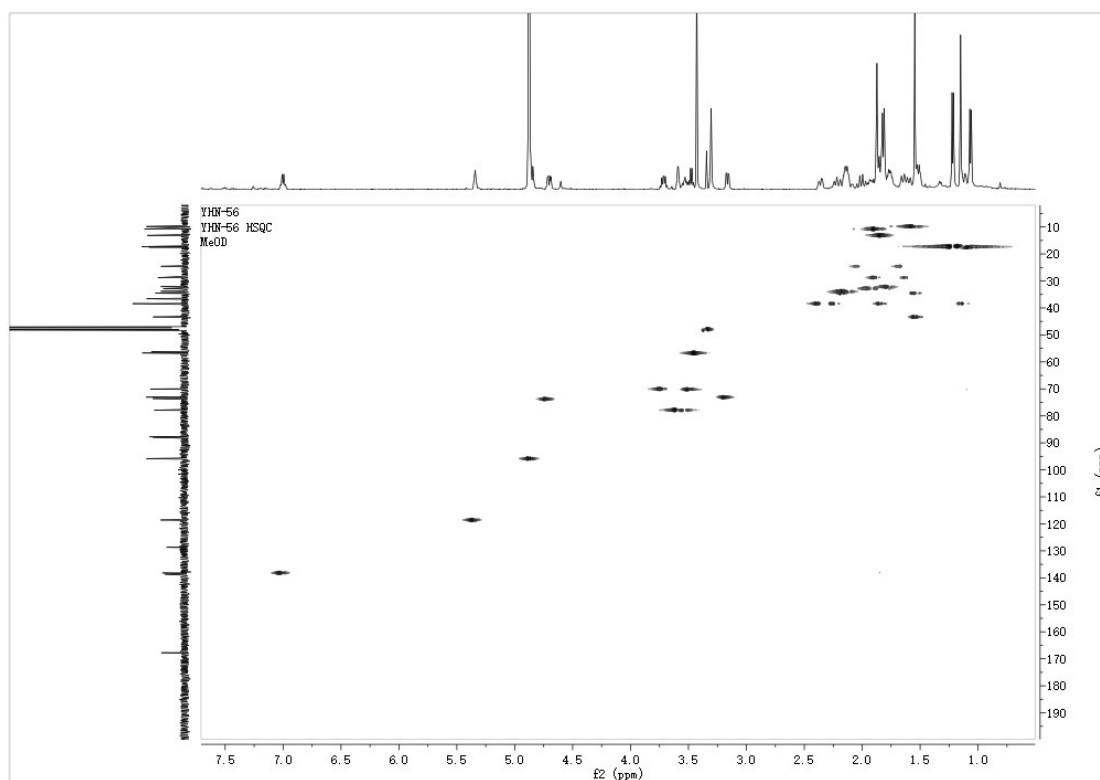

**Figure S54.** HSQC of **8** in  $\text{CD}_3\text{OD}$

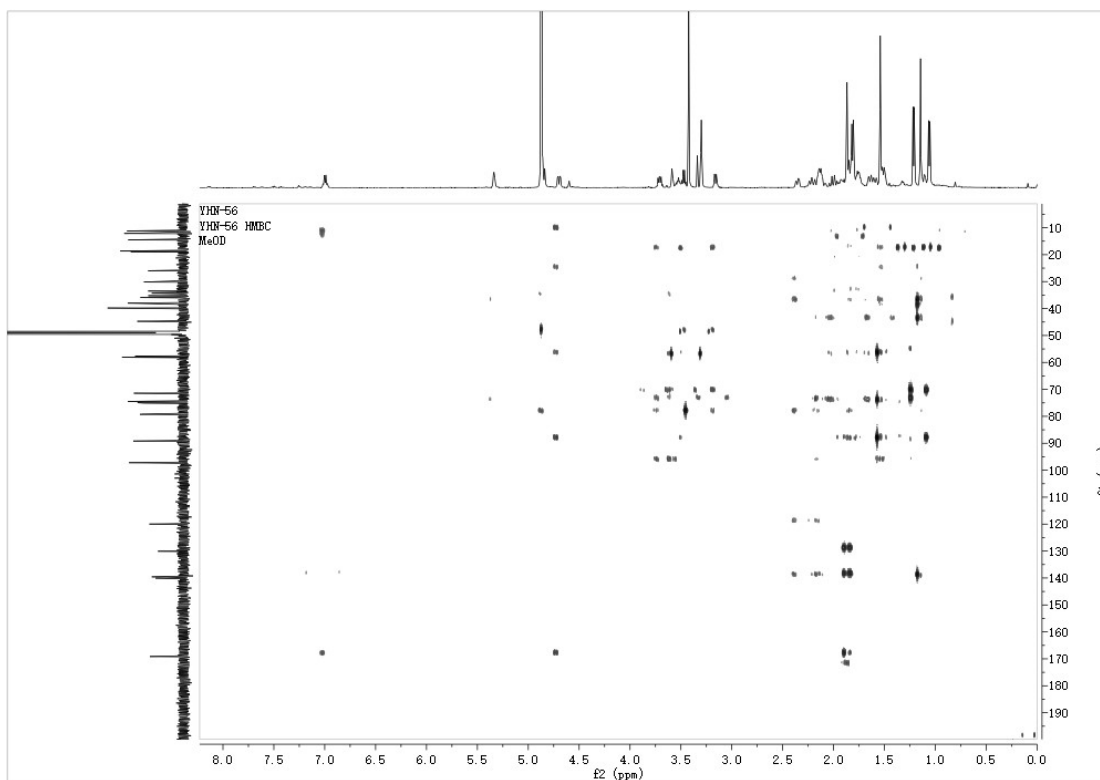

Figure S55. HMBC of **8** in CD<sub>3</sub>OD

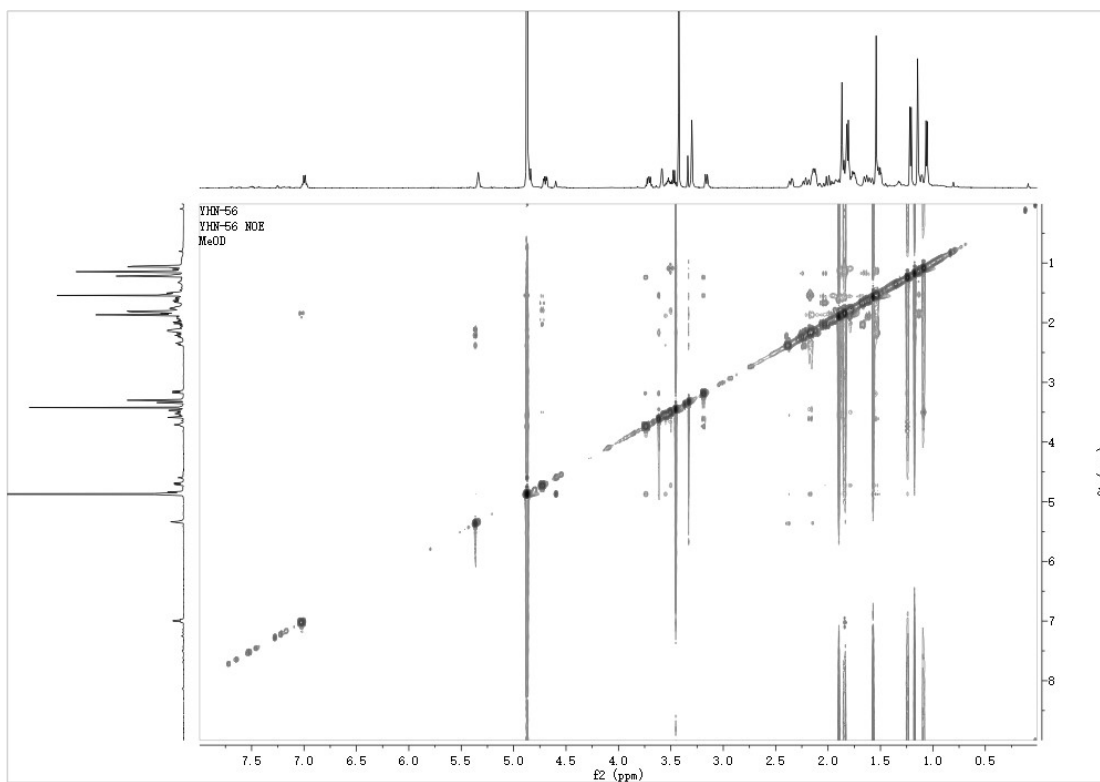

Figure S56. NOESY of **8** in CD<sub>3</sub>OD



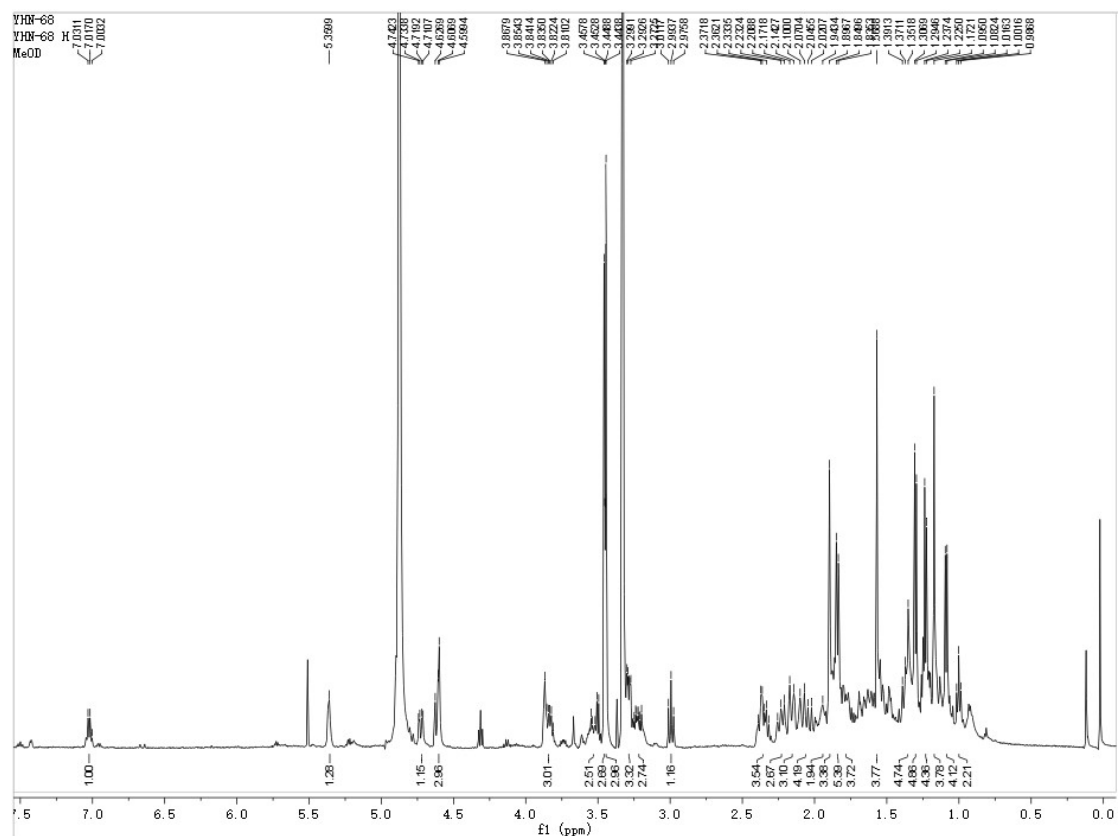

Figure S57.  $^1\text{H}$  NMR spectrum (500 MHz) of **9** in  $\text{CD}_3\text{OD}$

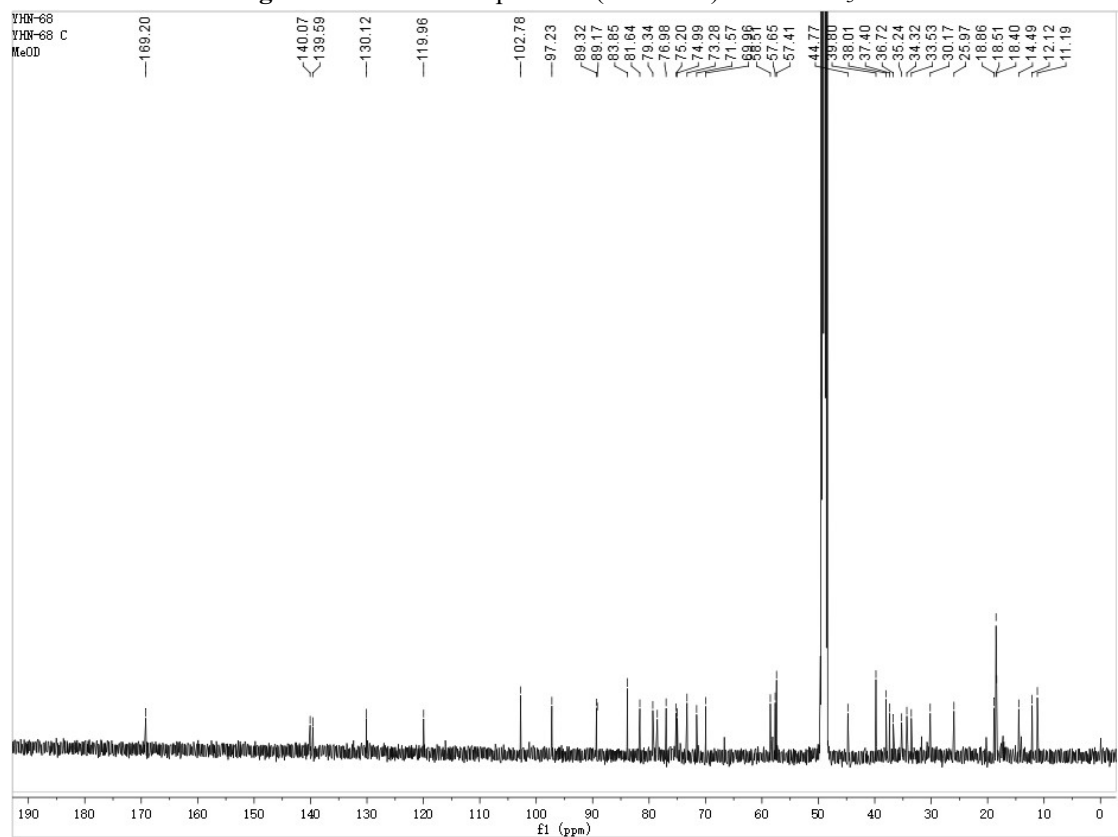

Figure S58.  $^{13}\text{C}$  NMR spectrum (125 MHz) of **9** in  $\text{CD}_3\text{OD}$

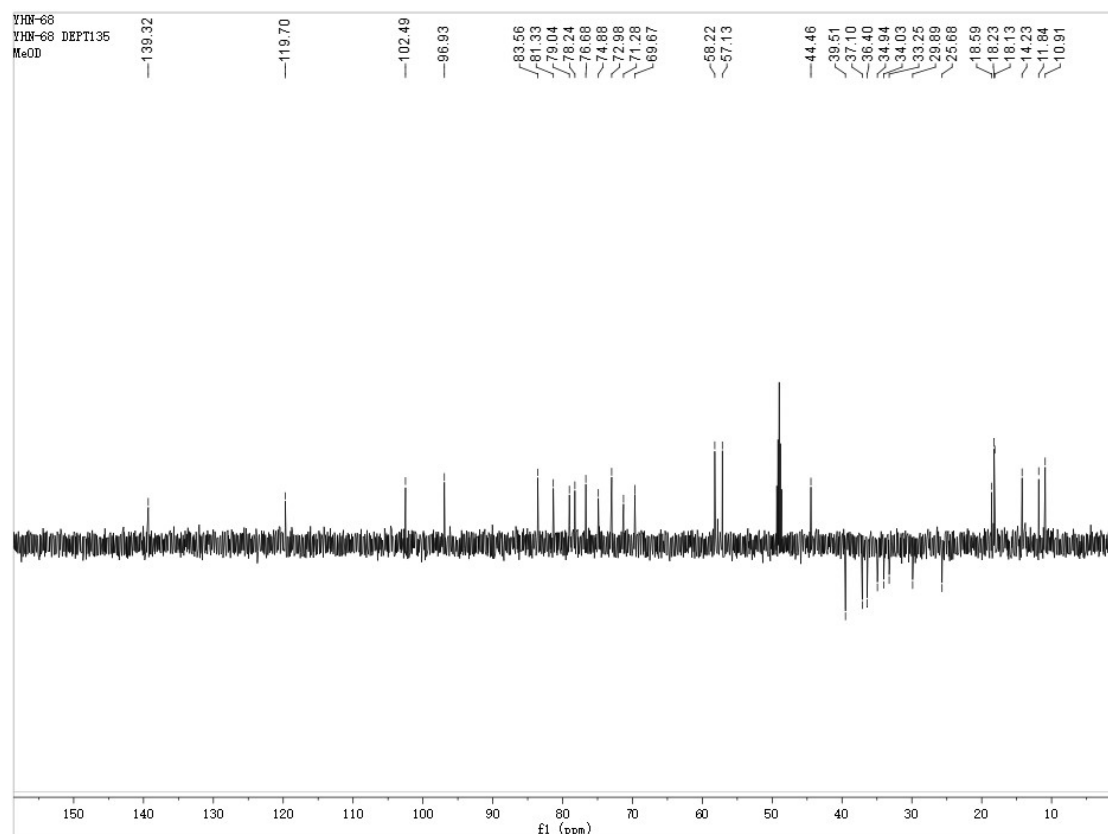

Figure S59. DEPT spectrum of **9** in CD<sub>3</sub>OD

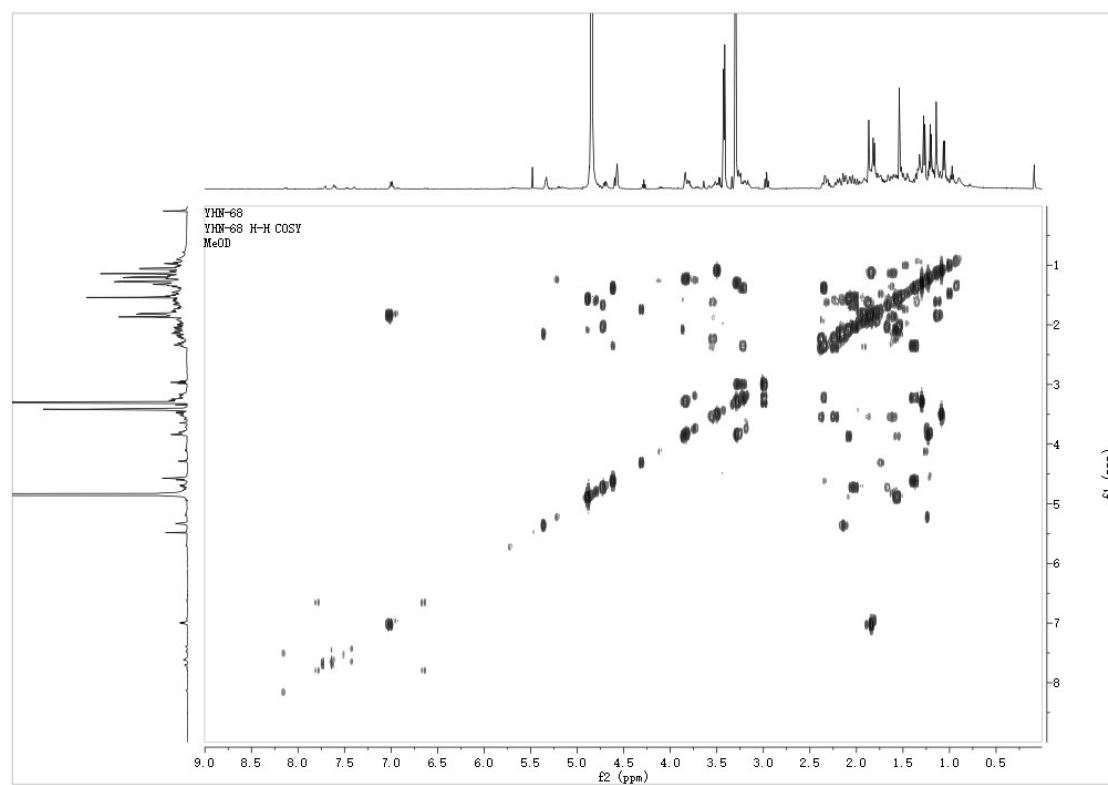

Figure S60. <sup>1</sup>H-<sup>1</sup>H COSY of **9** in CD<sub>3</sub>OD

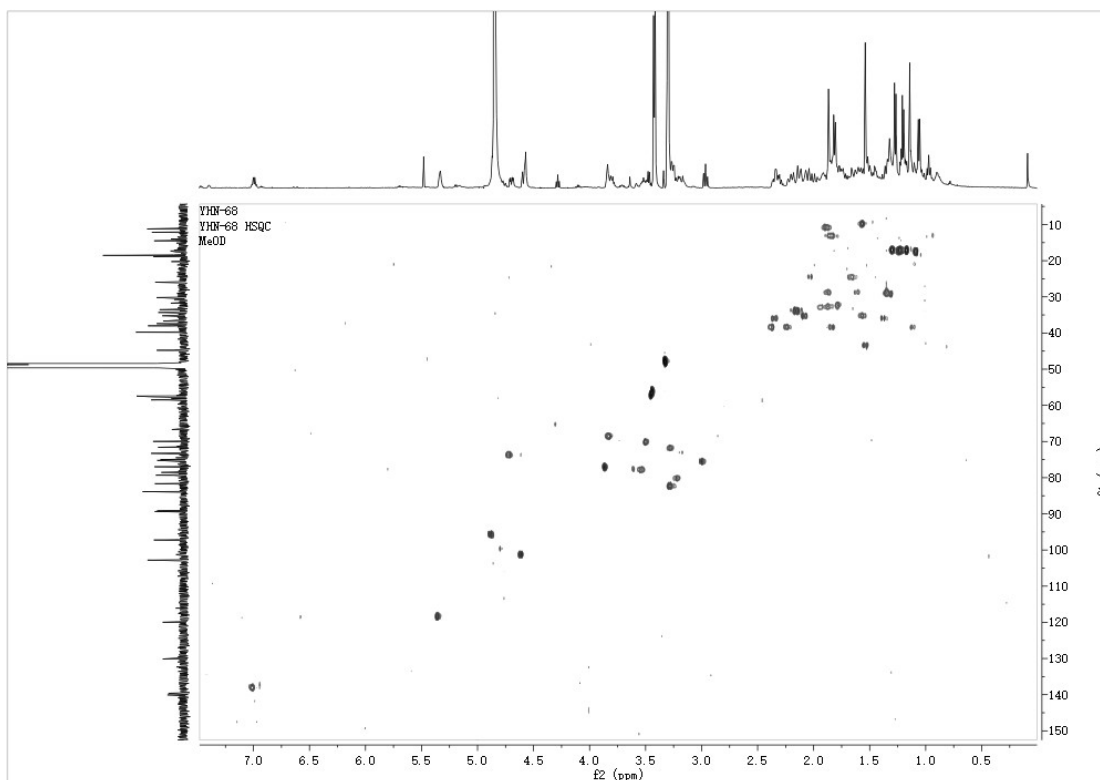

Figure S61. HSQC of **9** in CD<sub>3</sub>OD

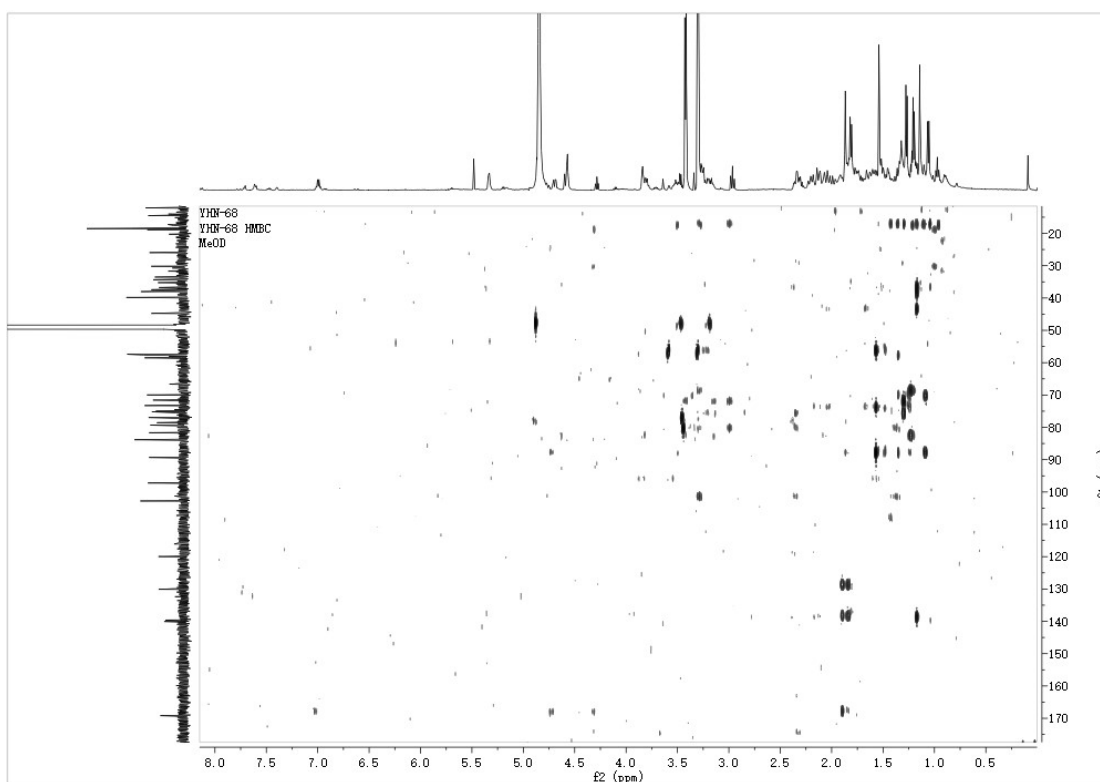

Figure S62. HMBC of **9** in CD<sub>3</sub>OD

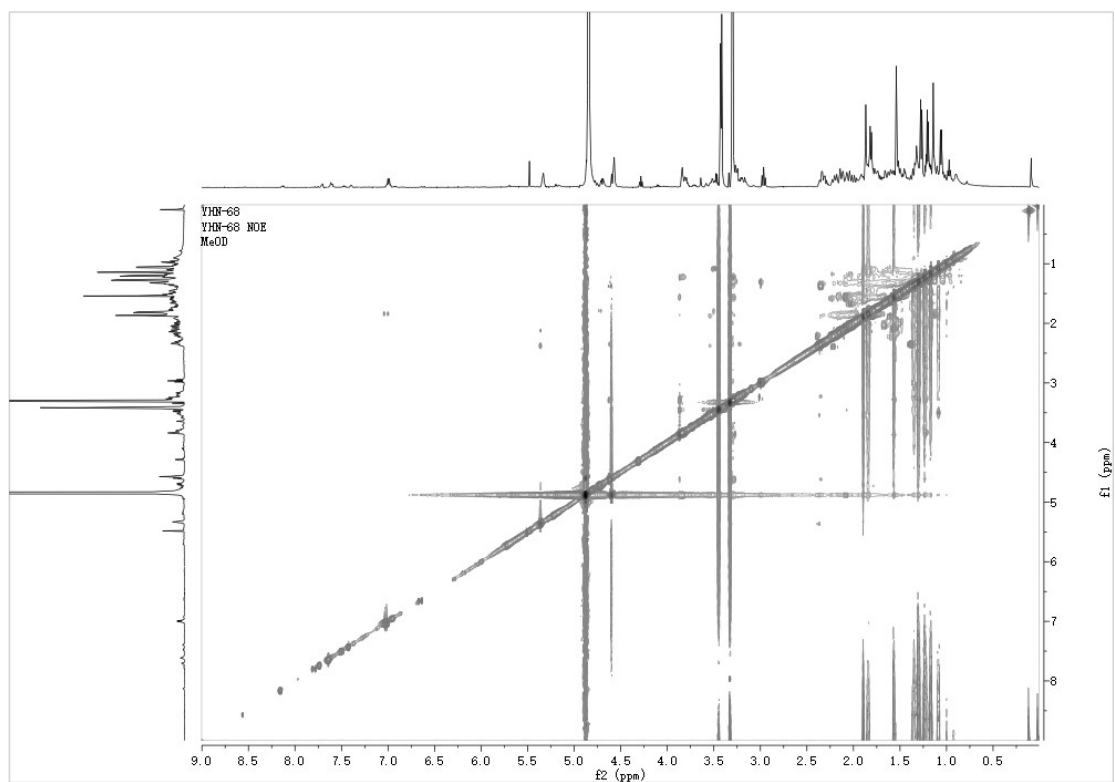

Figure S63. NOESY of **9** in CD<sub>3</sub>OD

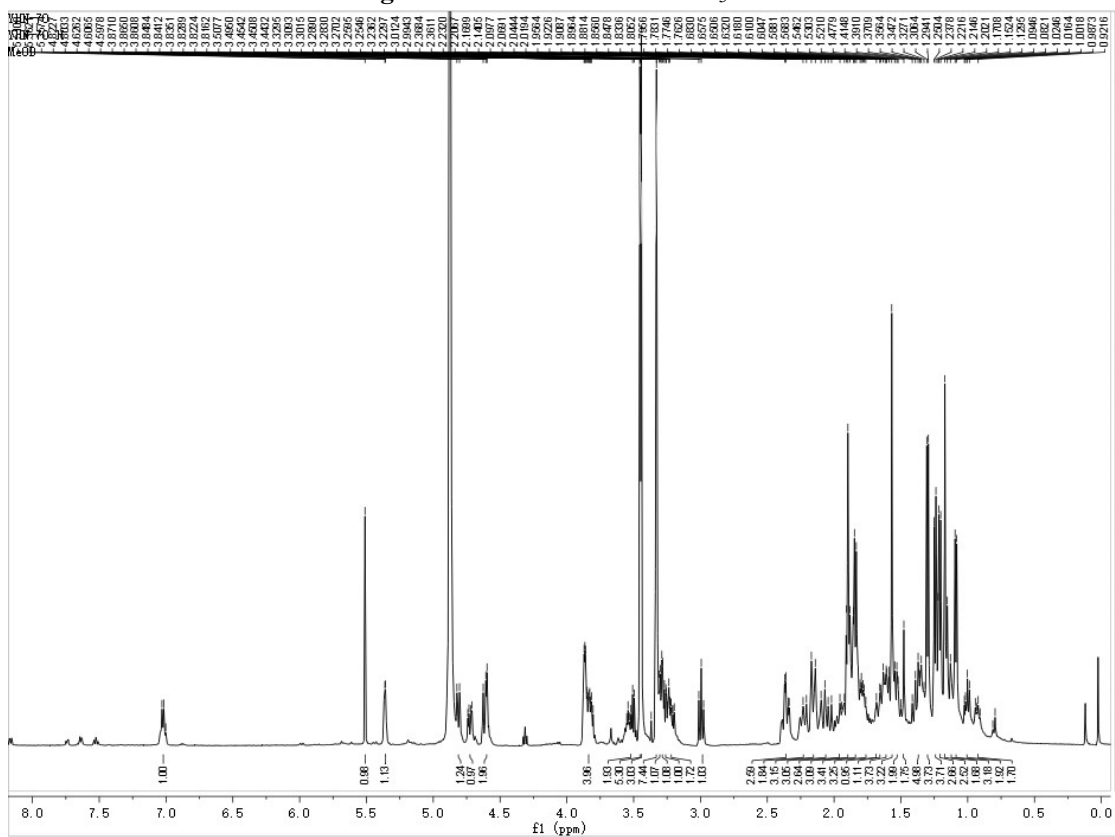

Figure S64. <sup>1</sup>H NMR spectrum (500 MHz) of **10** in CD<sub>3</sub>OD

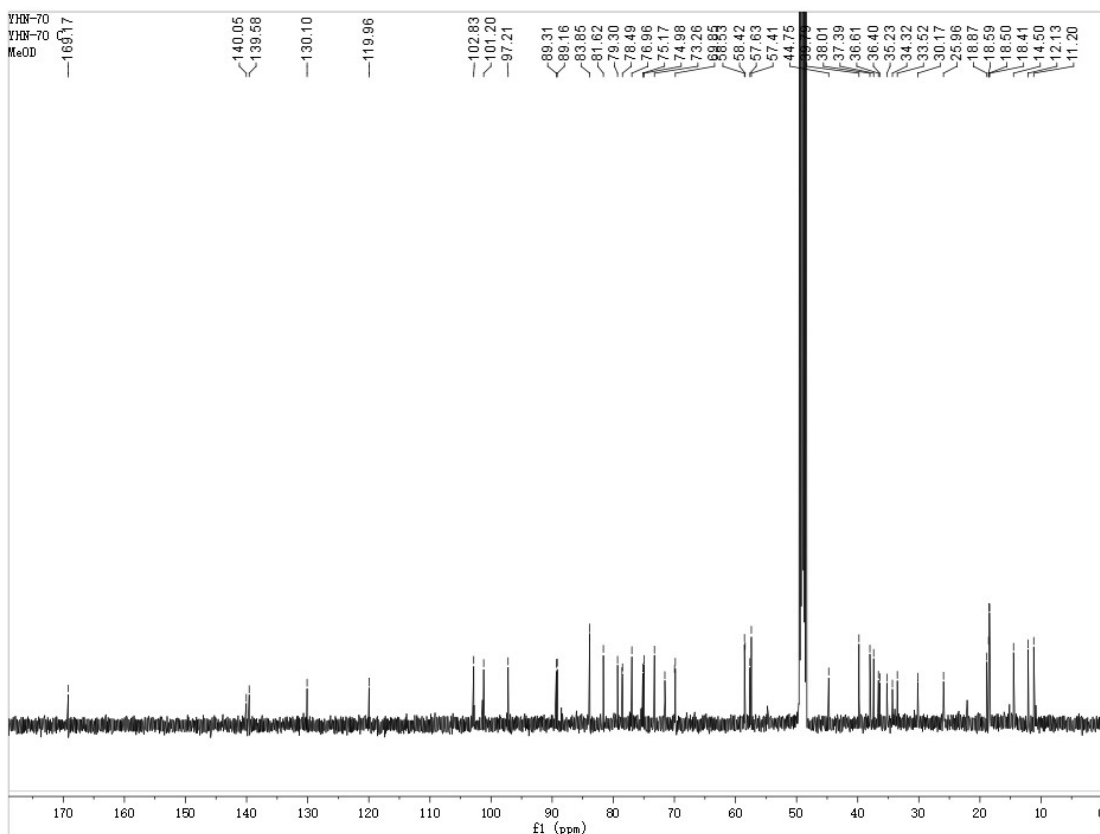

Figure S65.  $^{13}\text{C}$  NMR spectrum (125 MHz) of **10** in  $\text{CD}_3\text{OD}$

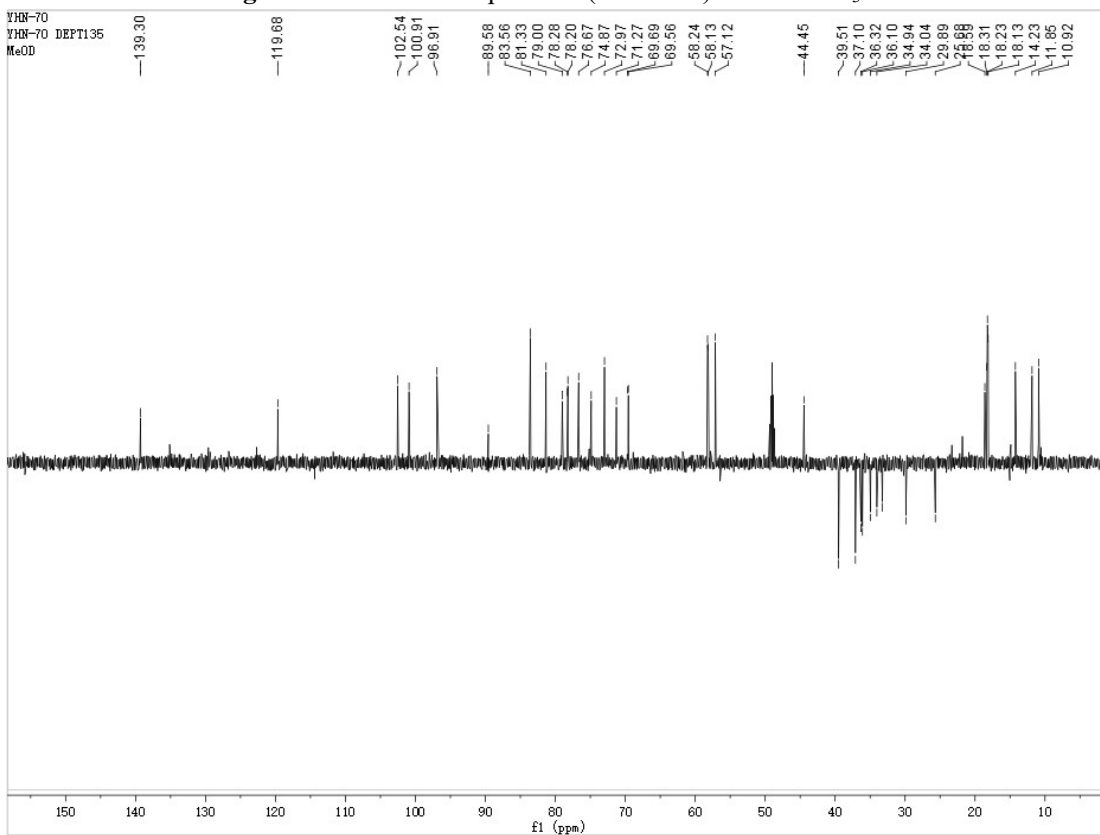

Figure S66. DEPT spectrum of **10** in  $\text{CD}_3\text{OD}$

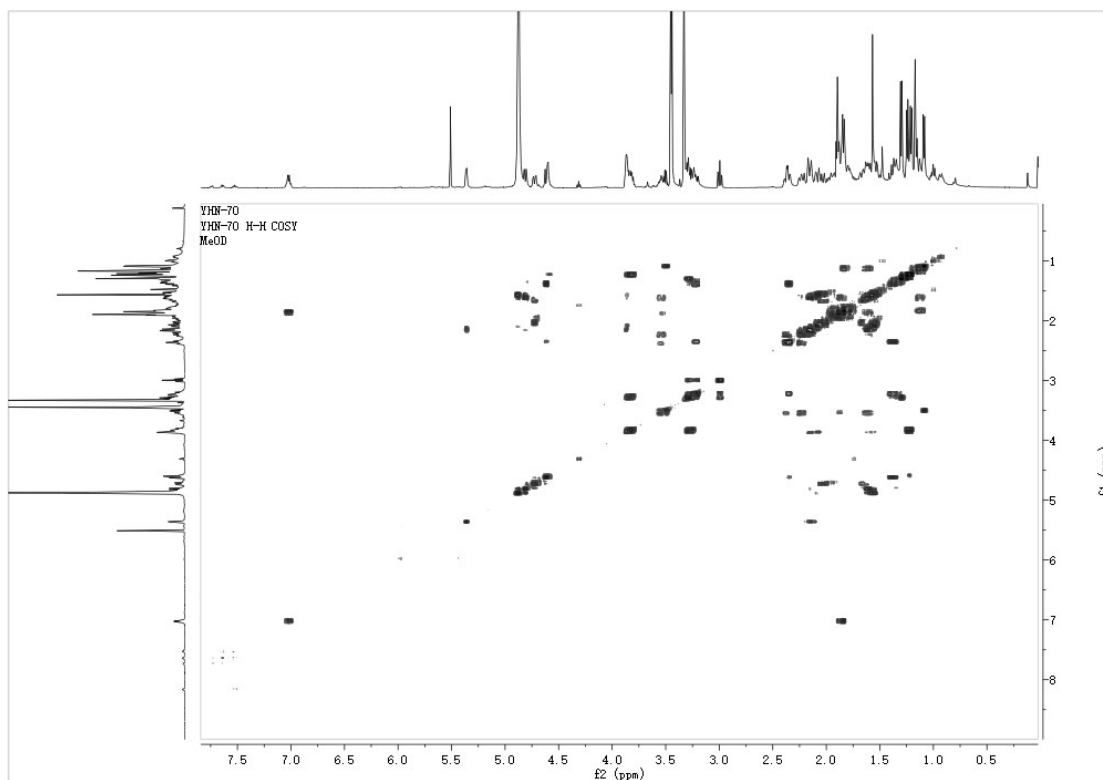

**Figure S67.**  $^1\text{H}$ - $^1\text{H}$  COSY of **10** in  $\text{CD}_3\text{OD}$

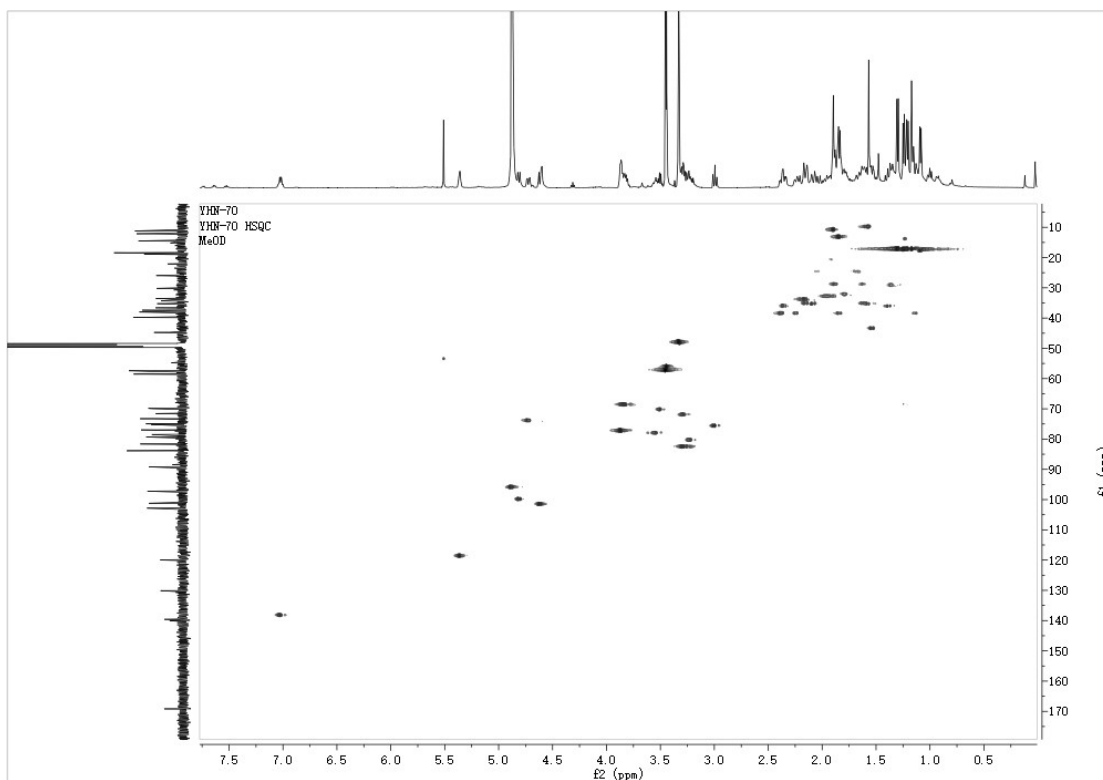

**Figure S68.** HSQC of **10** in  $\text{CD}_3\text{OD}$

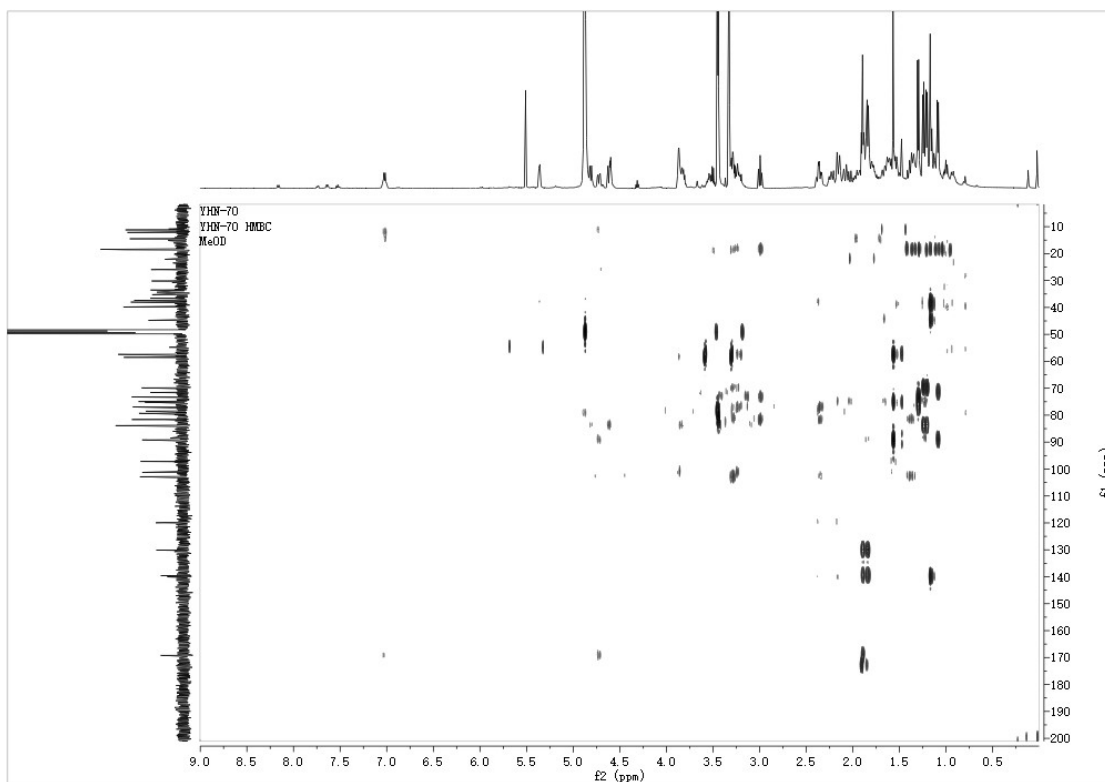

Figure S69. HMBC of 10 in CD<sub>3</sub>OD

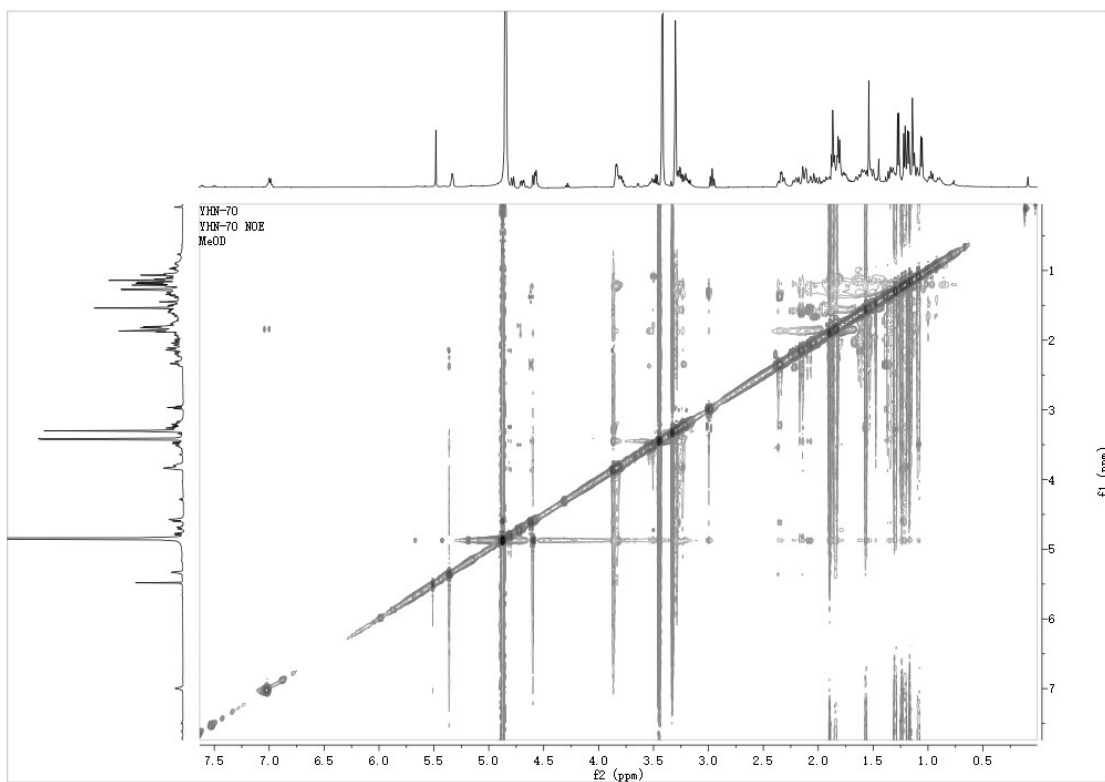

Figure S70. NOESY of 10 in CD<sub>3</sub>OD

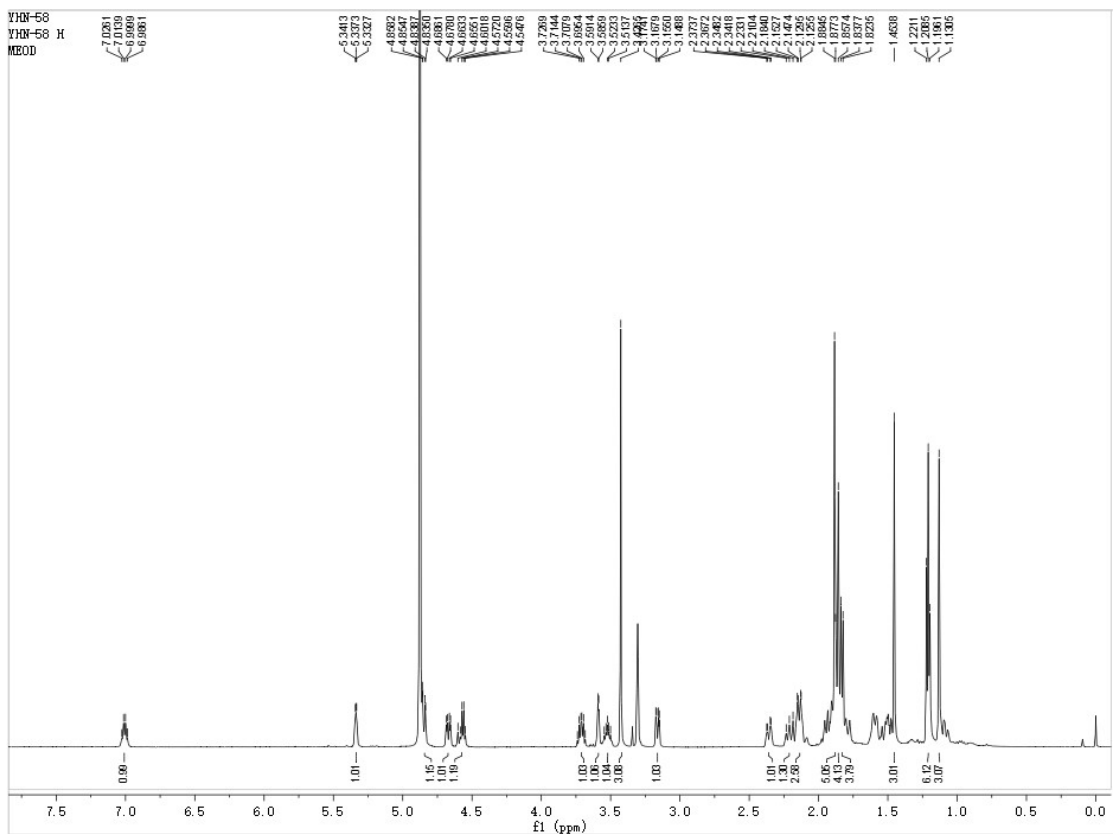

Figure S71.  $^1\text{H}$  NMR spectrum (500 MHz) of **11** in  $\text{CD}_3\text{OD}$

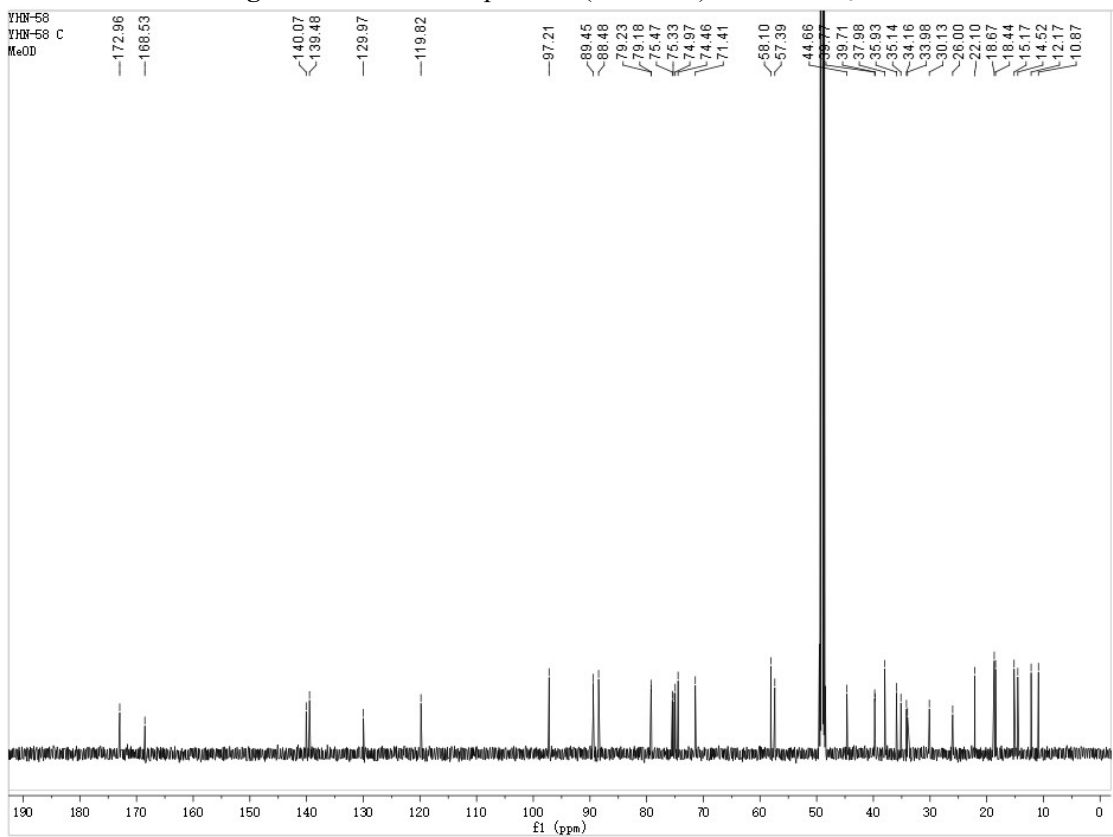

Figure S72.  $^{13}\text{C}$  NMR spectrum (125 MHz) of **11** in  $\text{CD}_3\text{OD}$



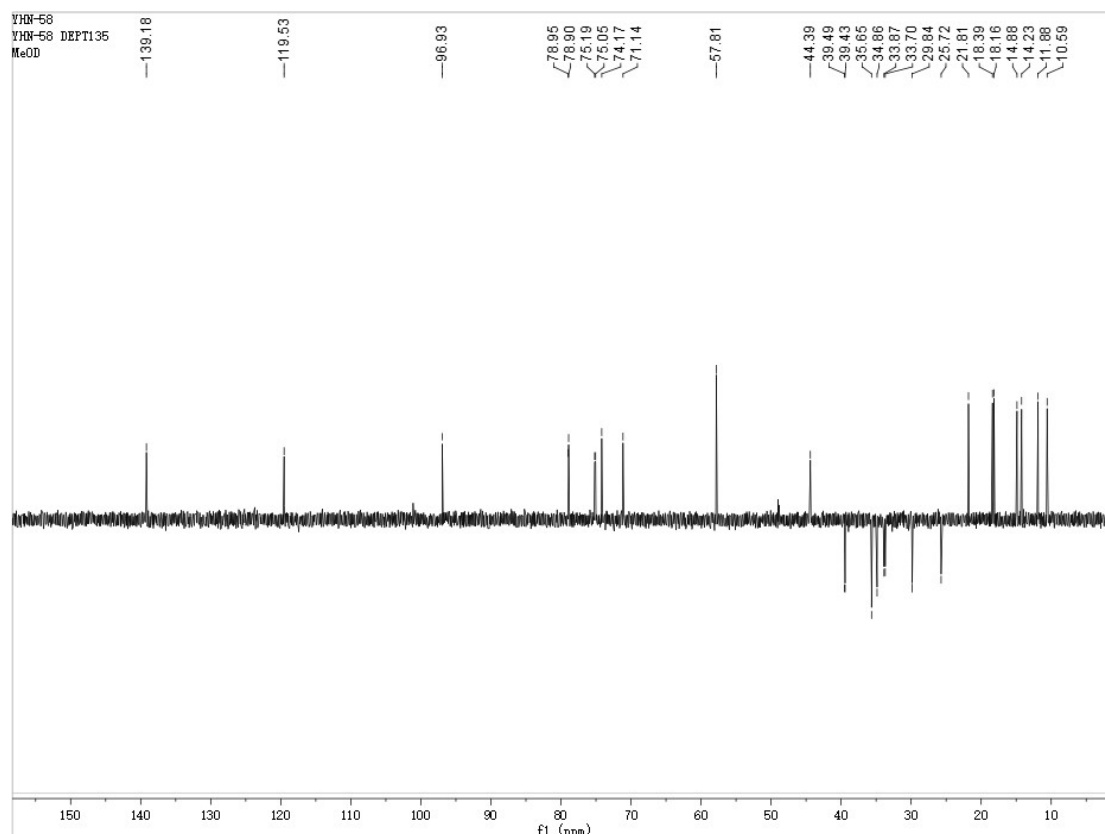

Figure S73. DEPT spectrum (125 MHz) of **11** in CD<sub>3</sub>OD

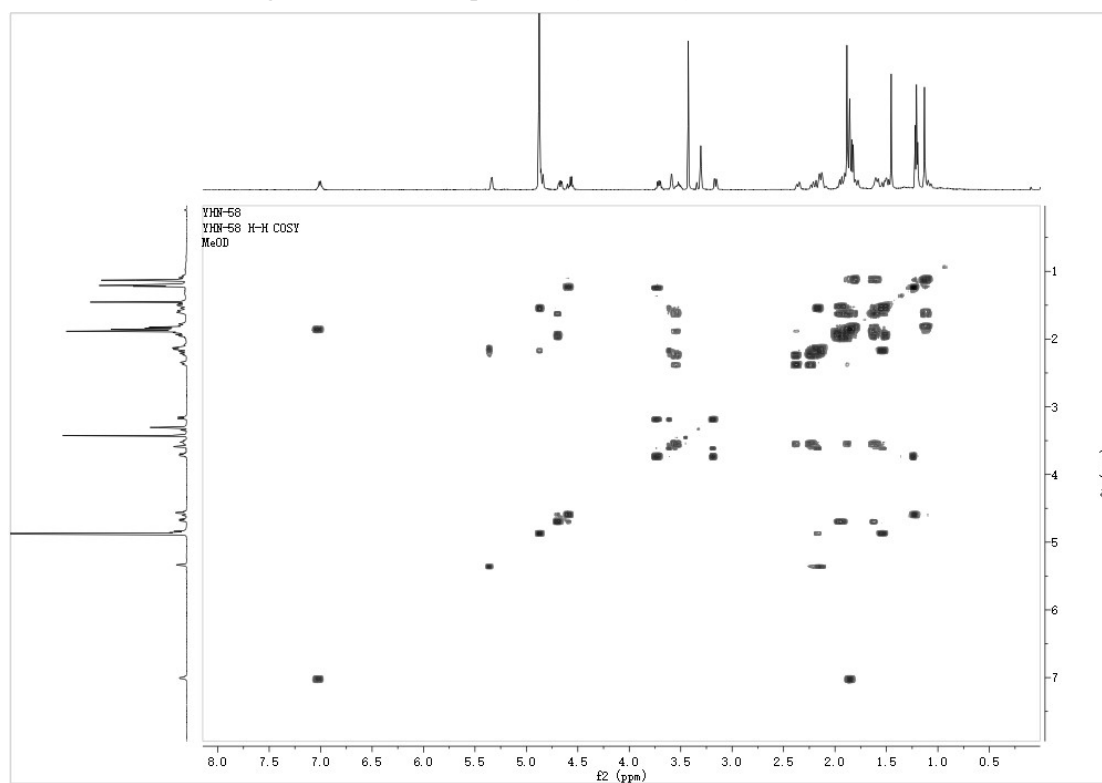

Figure S74. <sup>1</sup>H-<sup>1</sup>H COSY (500 MHz) of **11** in CD<sub>3</sub>OD

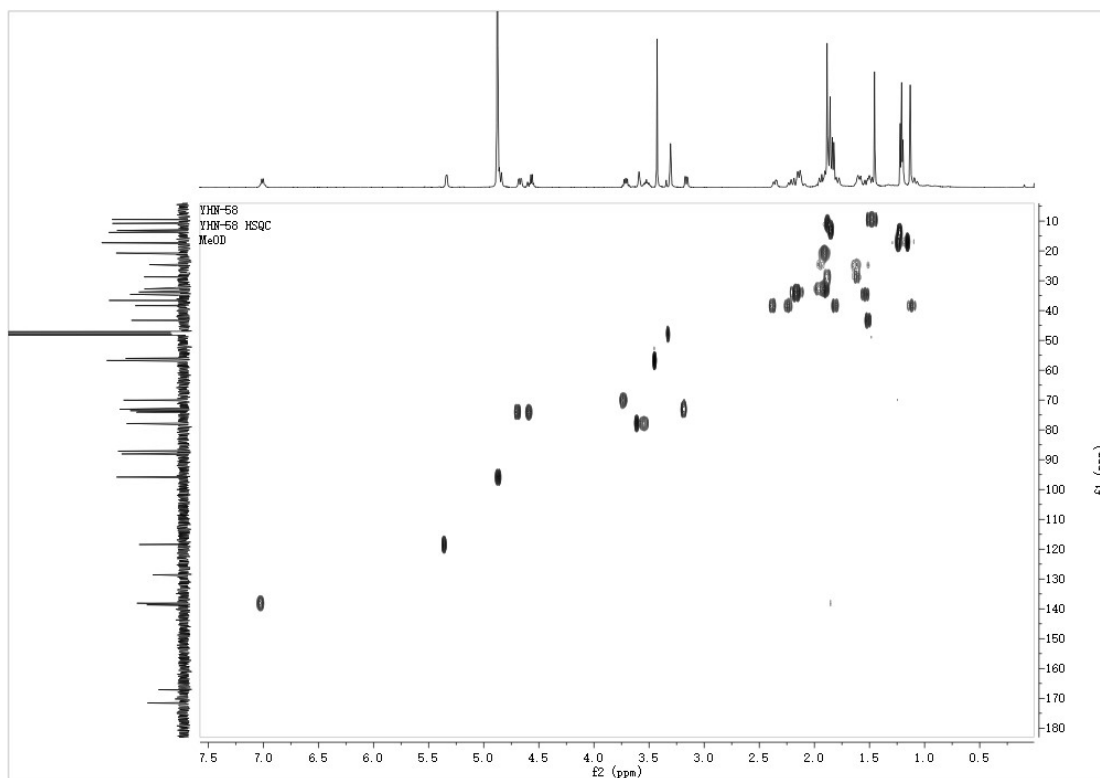

Figure S75. HSQC of 11 in CD<sub>3</sub>OD

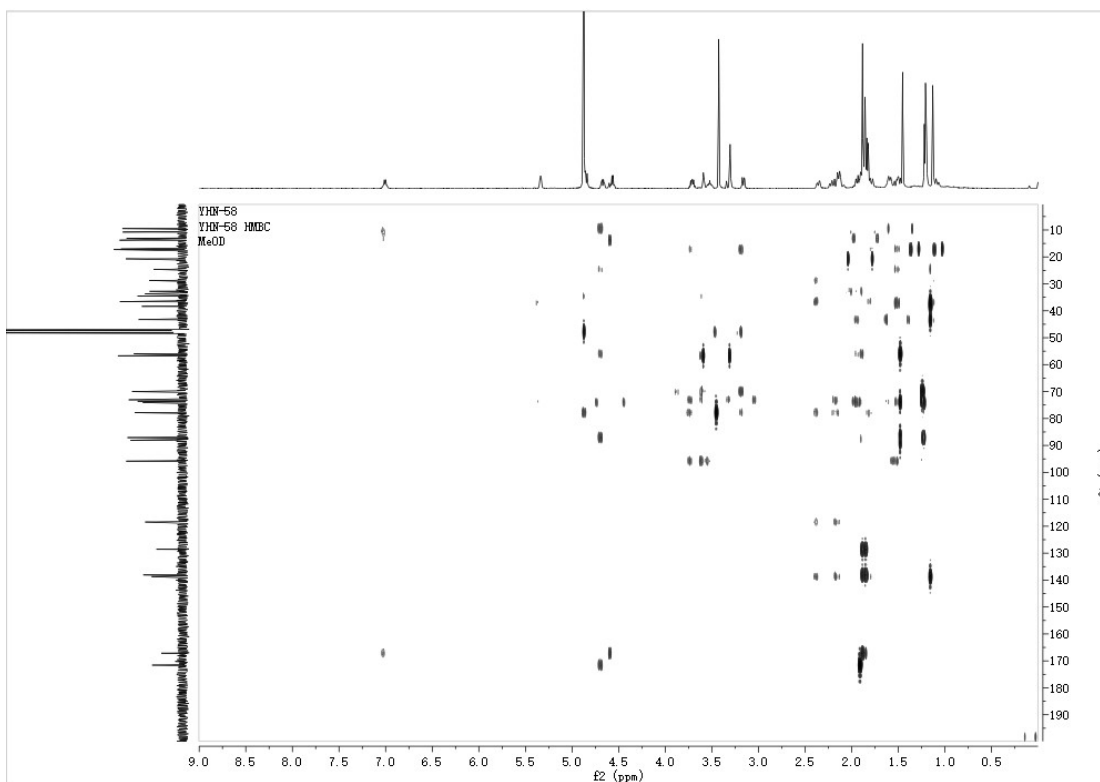

Figure S76. HMBC of 11 in CD<sub>3</sub>OD



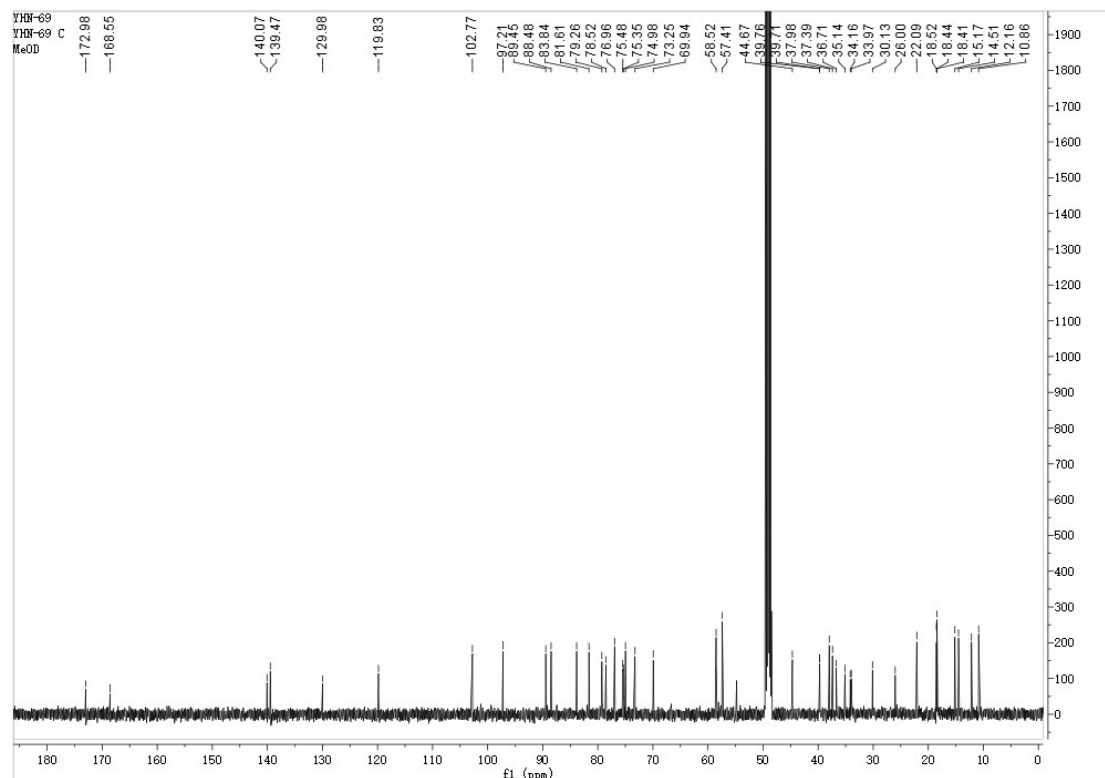

Figure S79.  $^{13}\text{C}$  NMR spectrum (125 MHz) of **12** in  $\text{CD}_3\text{OD}$

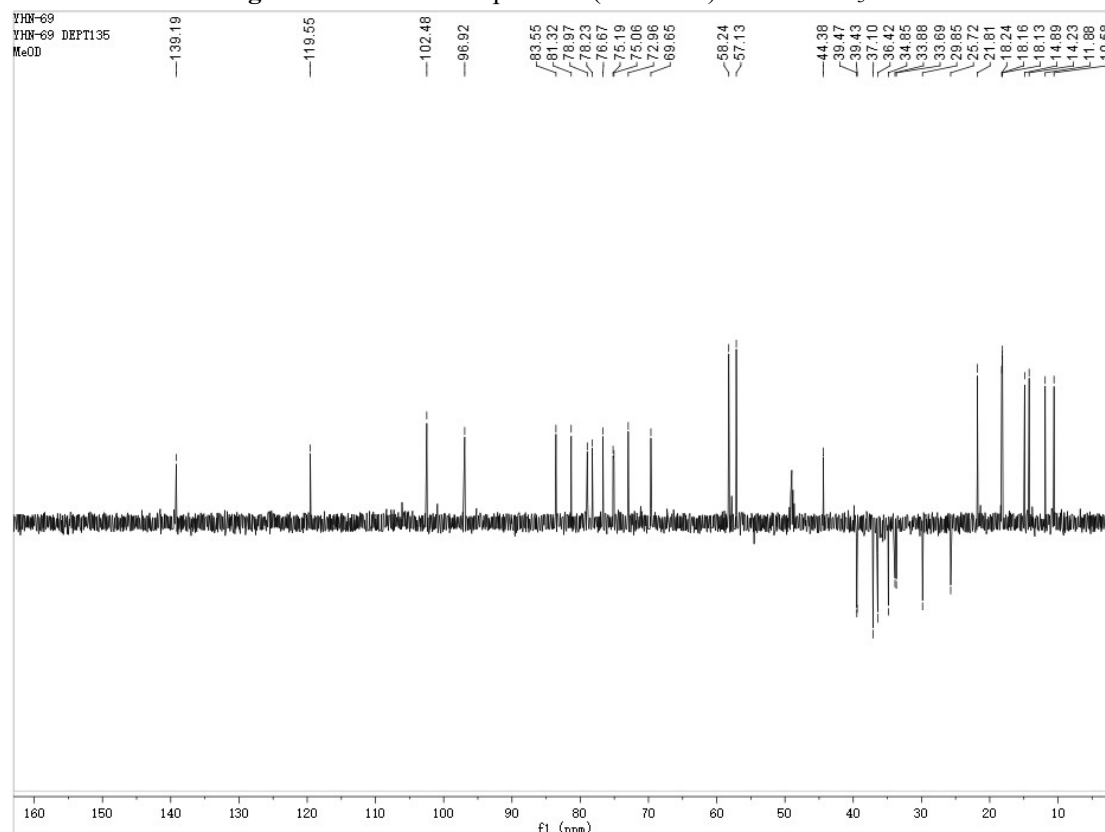

Figure S80. DEPT spectrum of **12** in  $\text{CD}_3\text{OD}$

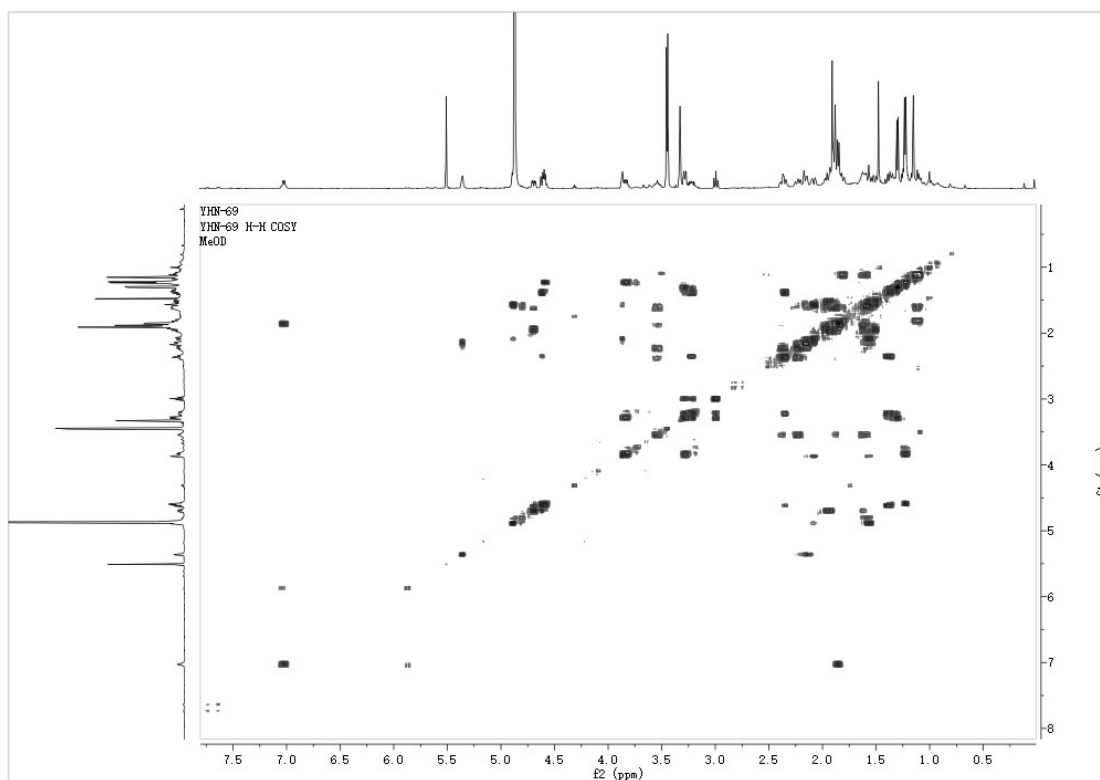

**Figure S81.**  $^1\text{H}$ - $^1\text{H}$  COSY of **12** in  $\text{CD}_3\text{OD}$

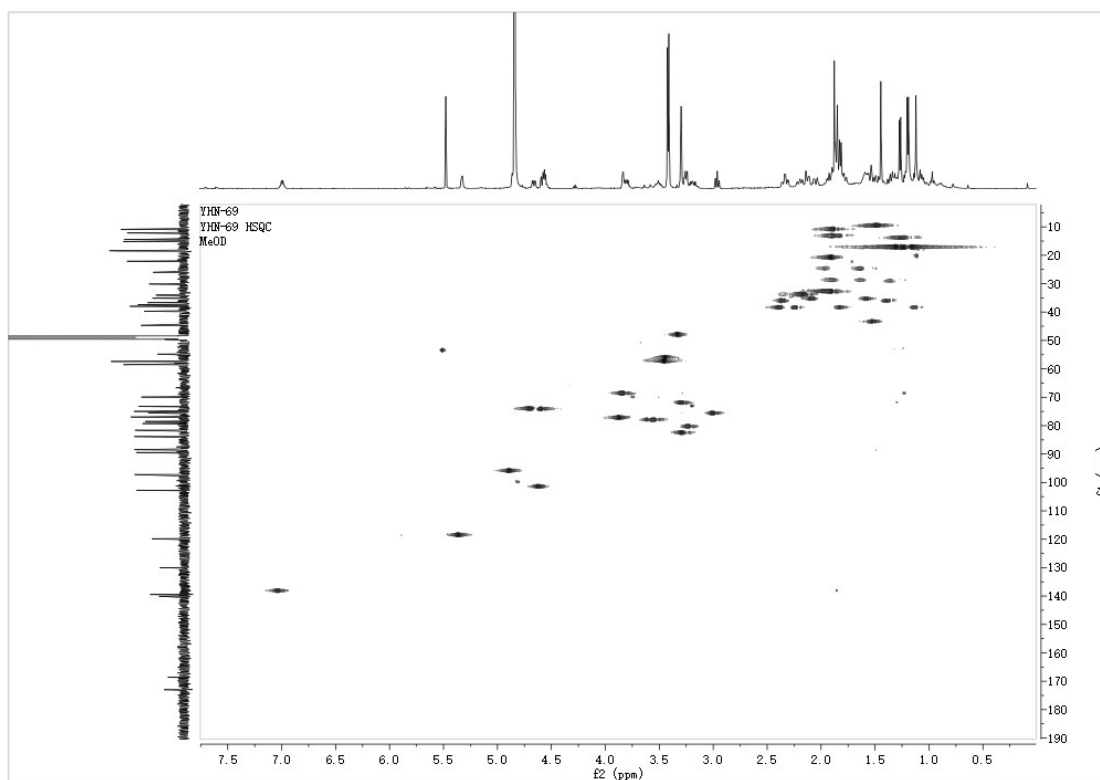

**Figure S82.** HSQC of **12** in  $\text{CD}_3\text{OD}$

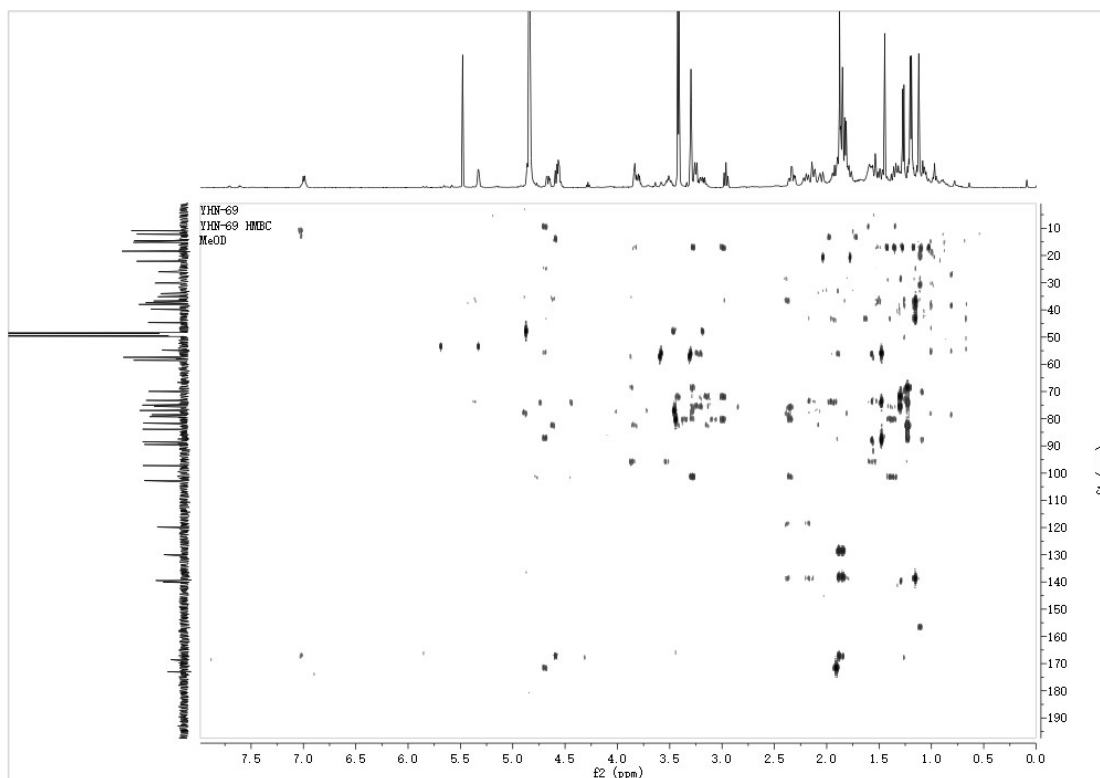

Figure S83. HMBC of 12 in CD<sub>3</sub>OD

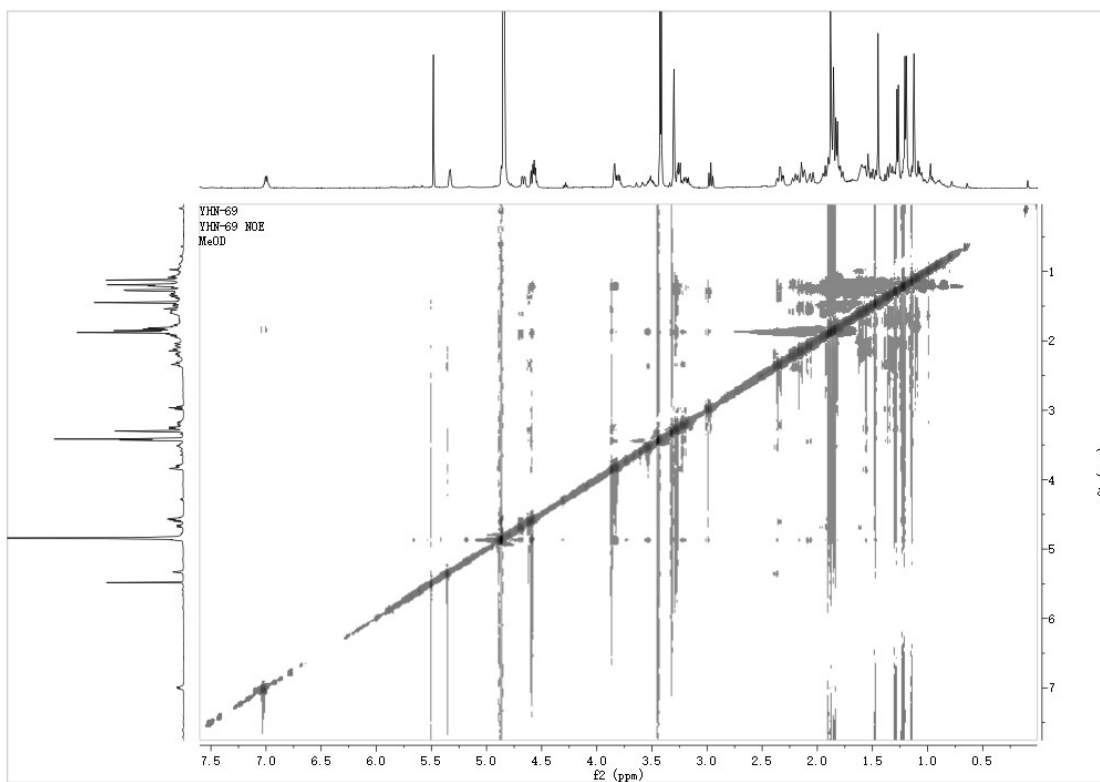

Figure S84. NOESY of 12 in CD<sub>3</sub>OD

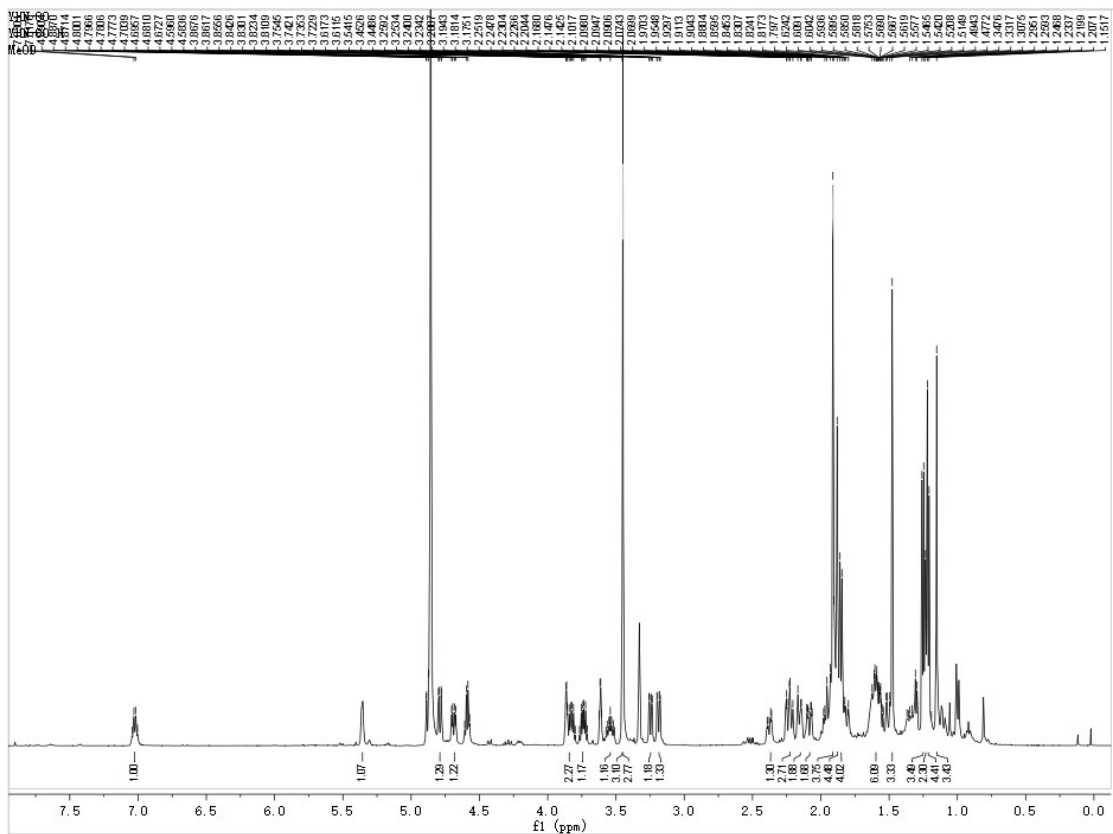

Figure S85. <sup>1</sup>H NMR spectrum (500 MHz) of **13** in CD<sub>3</sub>OD

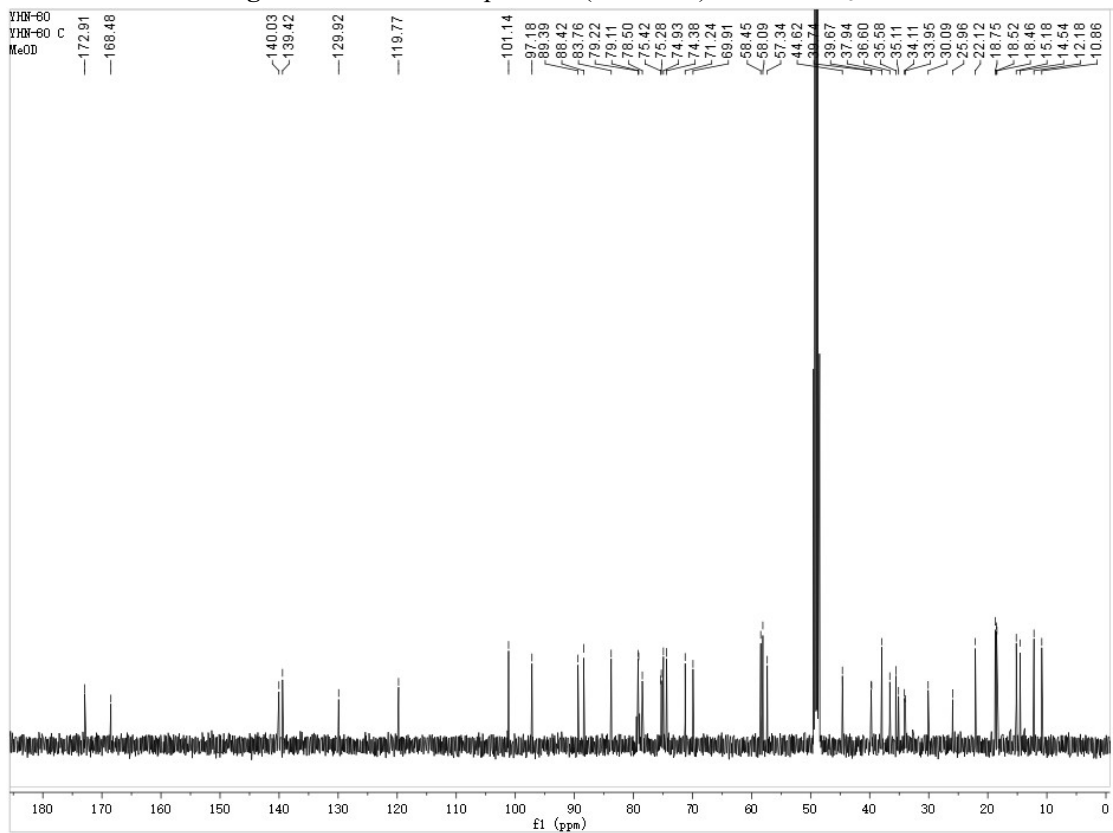

Figure S86. <sup>13</sup>C NMR spectrum (125 MHz) of **13** in CD<sub>3</sub>OD

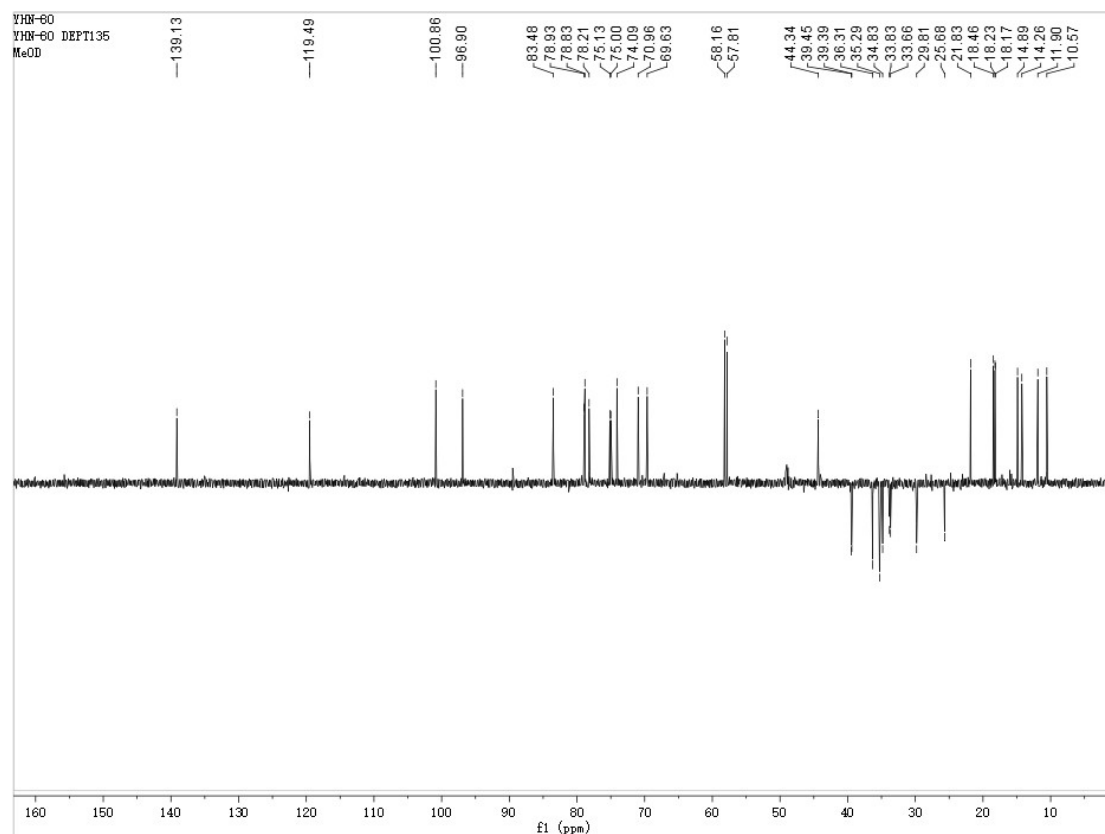

Figure S87. DEPT spectrum of 13 in CD<sub>3</sub>OD

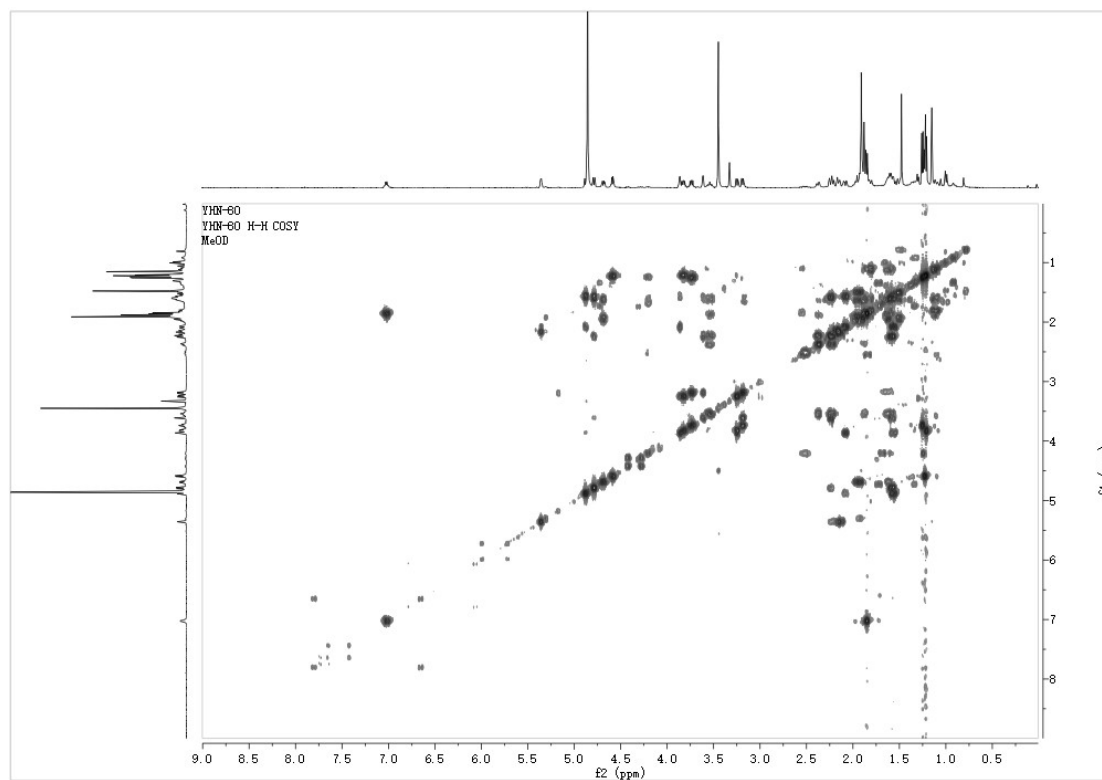

Figure S88. <sup>1</sup>H-<sup>1</sup>H COSY of 13 in CD<sub>3</sub>OD



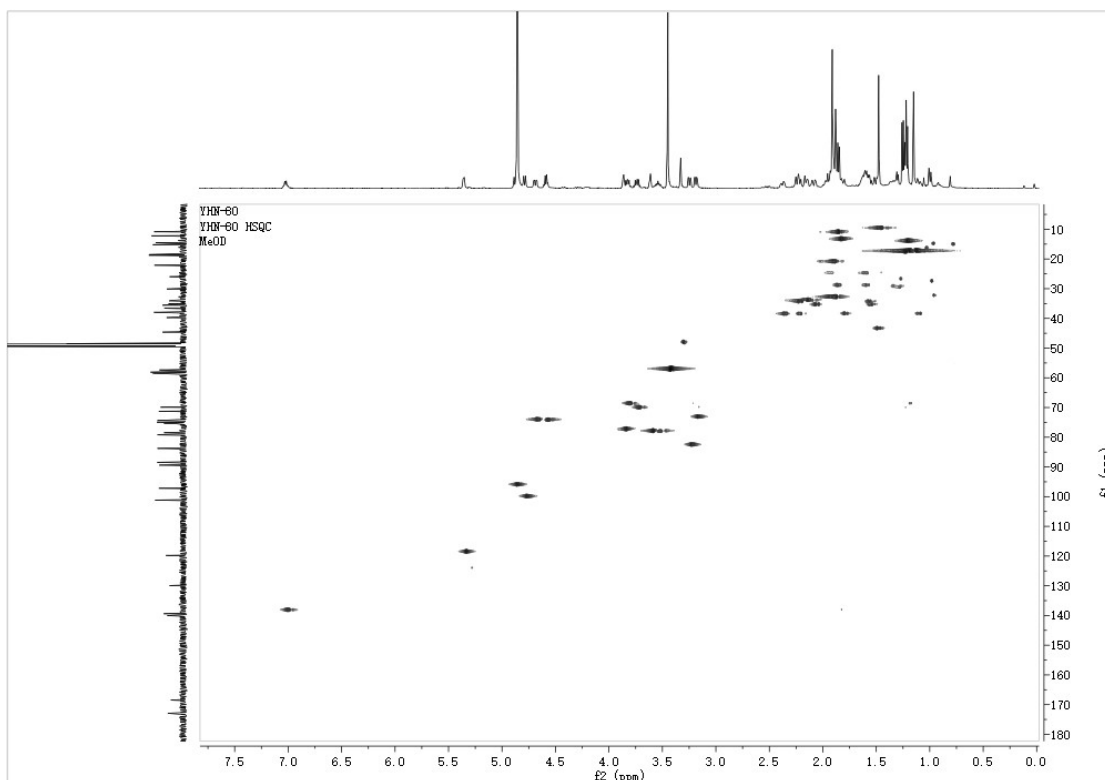

Figure S89. HSQC of 13 in CD<sub>3</sub>OD

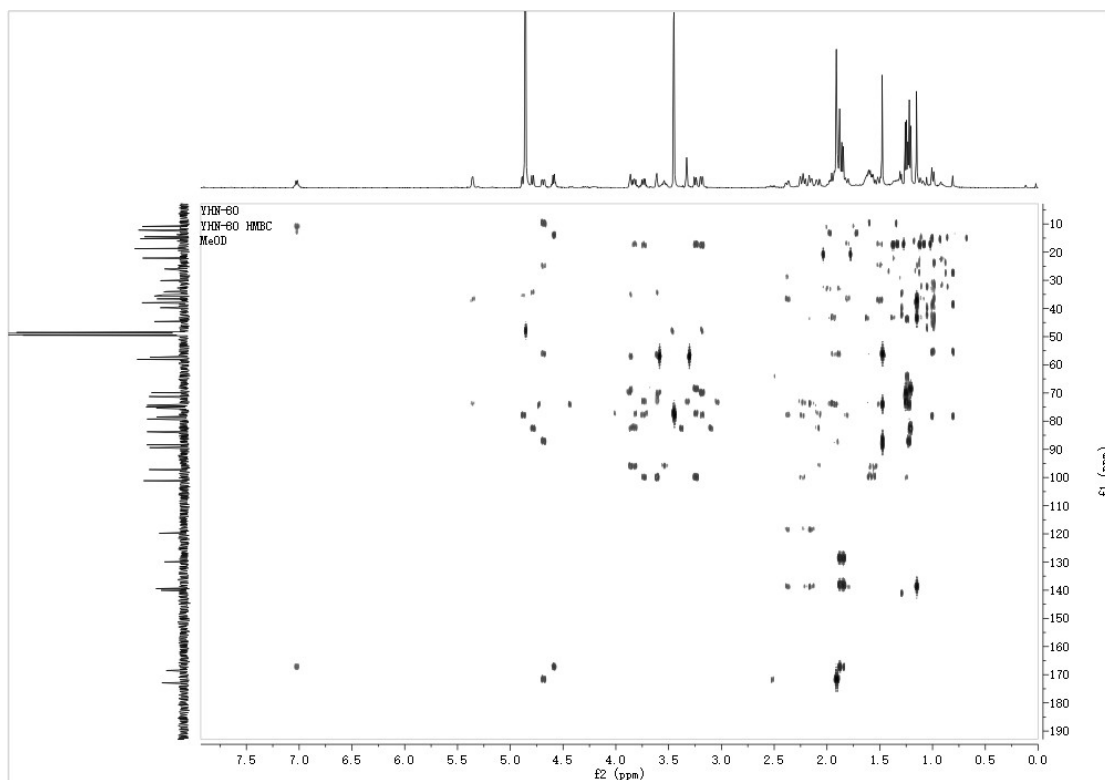

Figure S90. HMBC of 13 in CD<sub>3</sub>OD

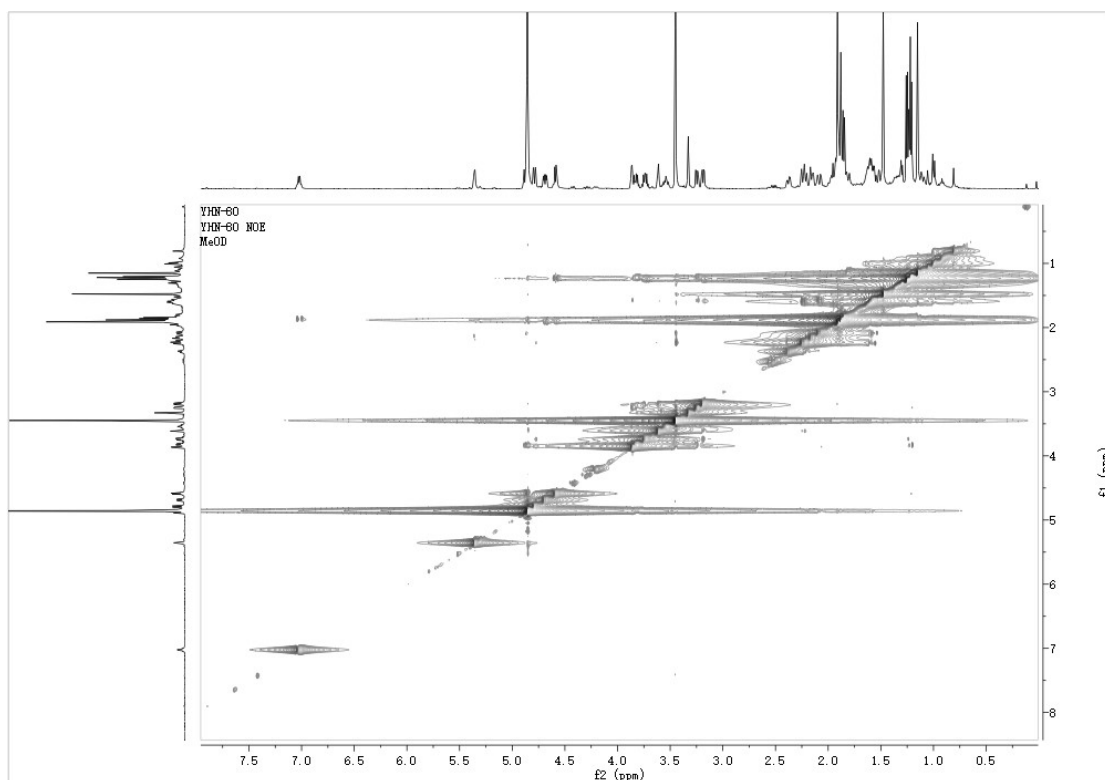

Figure S91. NOESY of 13 in CD<sub>3</sub>OD

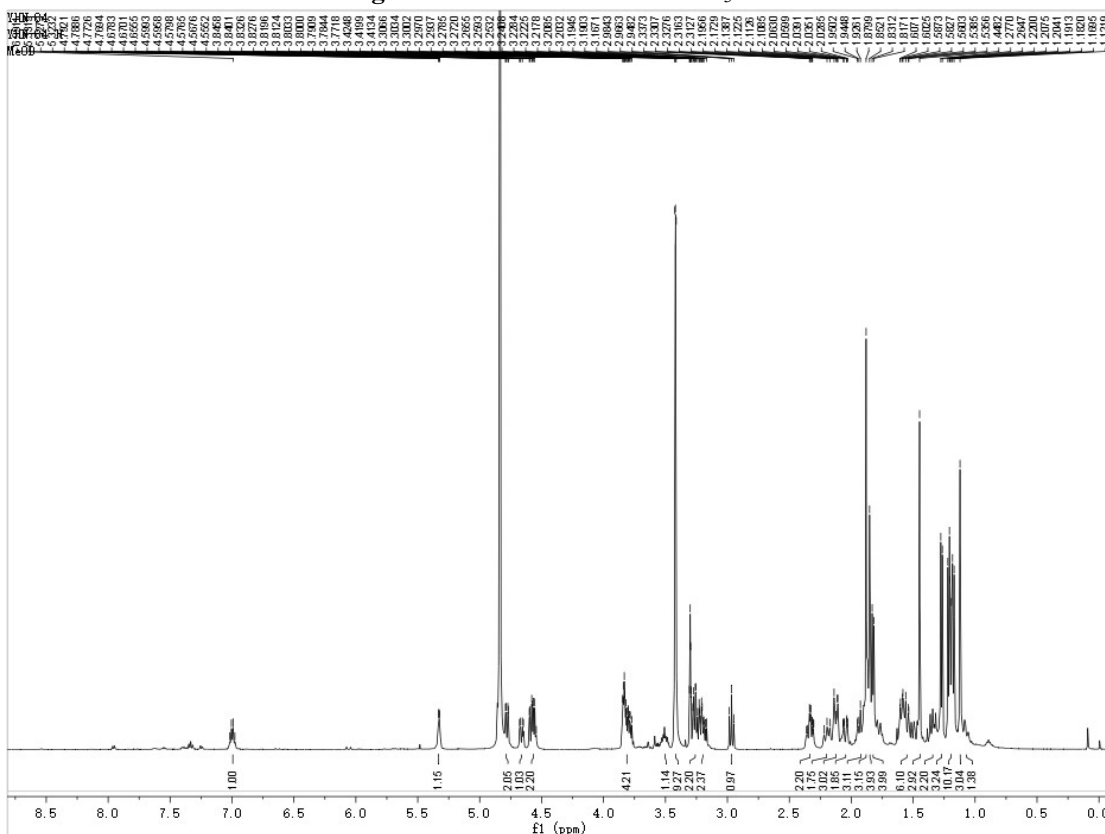

Figure S92. <sup>1</sup>H NMR spectrum (500 MHz) of 14 in CD<sub>3</sub>OD

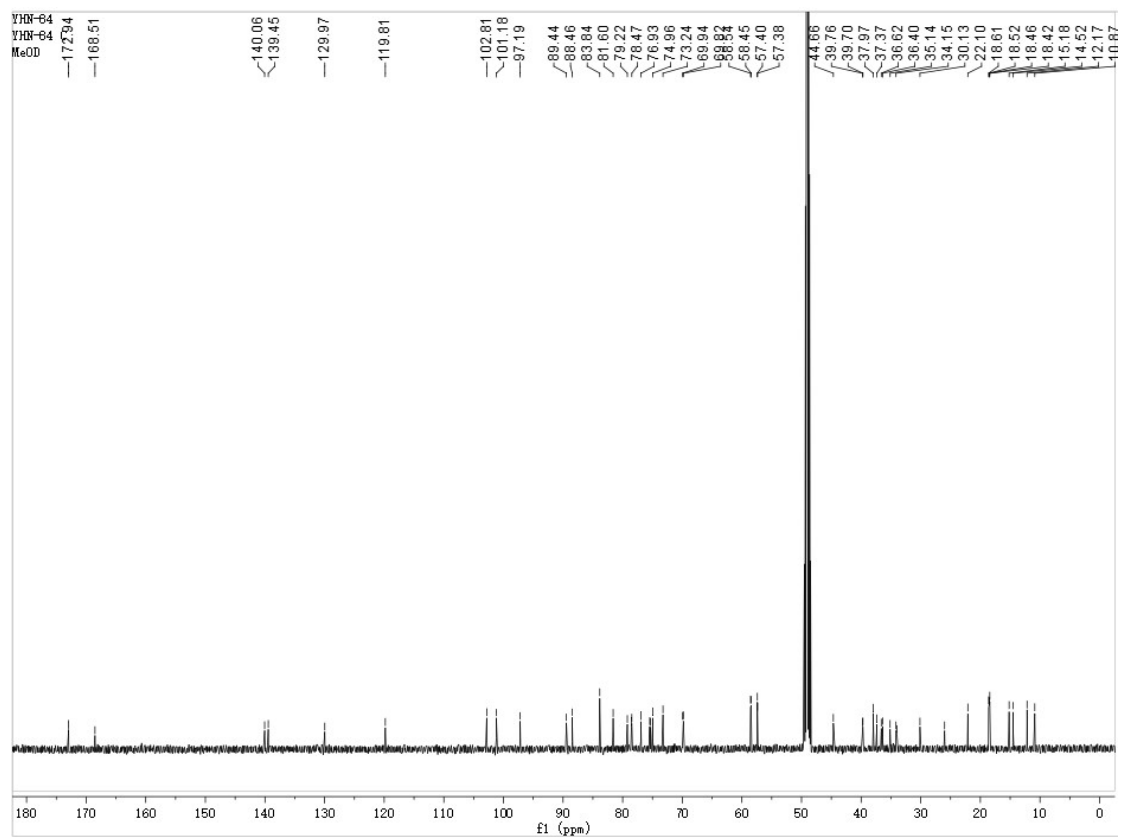

Figure S93.  $^{13}\text{C}$  NMR spectrum (125 MHz) of **14** in  $\text{CD}_3\text{OD}$

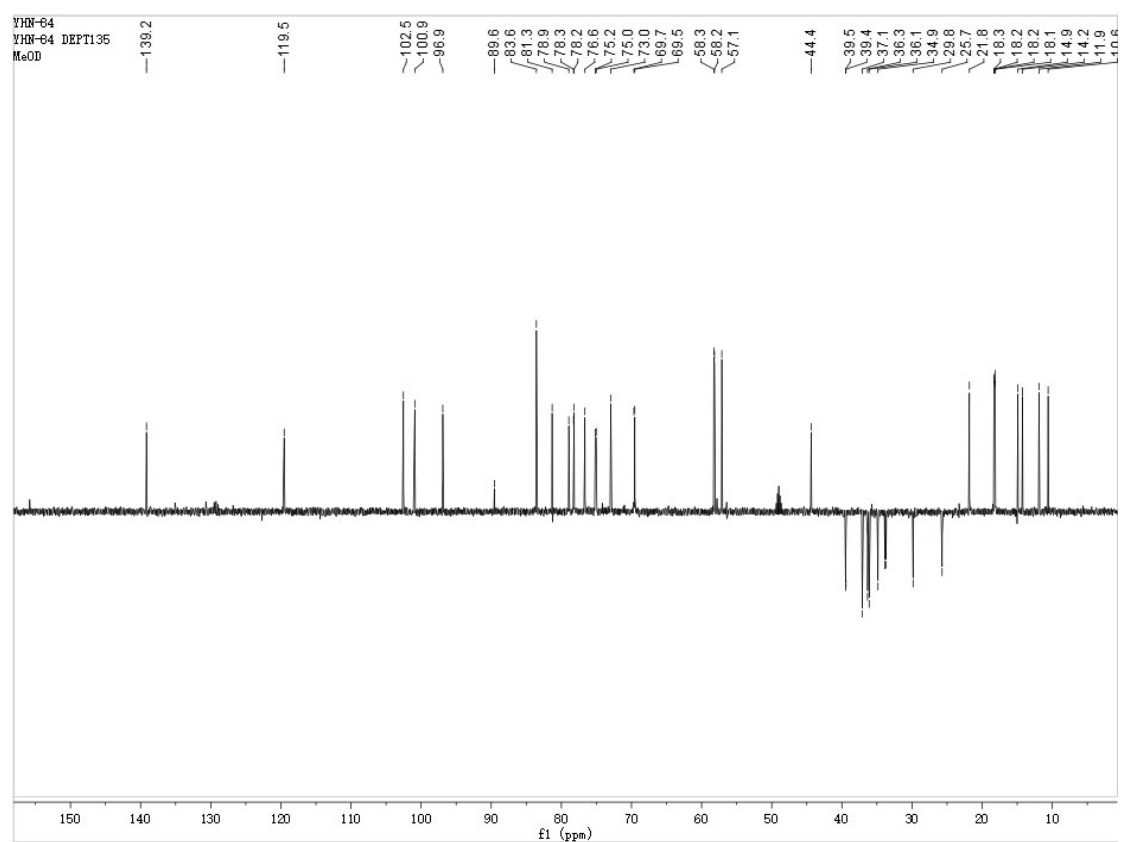

Figure S94. DEPT spectrum of **14** in  $\text{CD}_3\text{OD}$

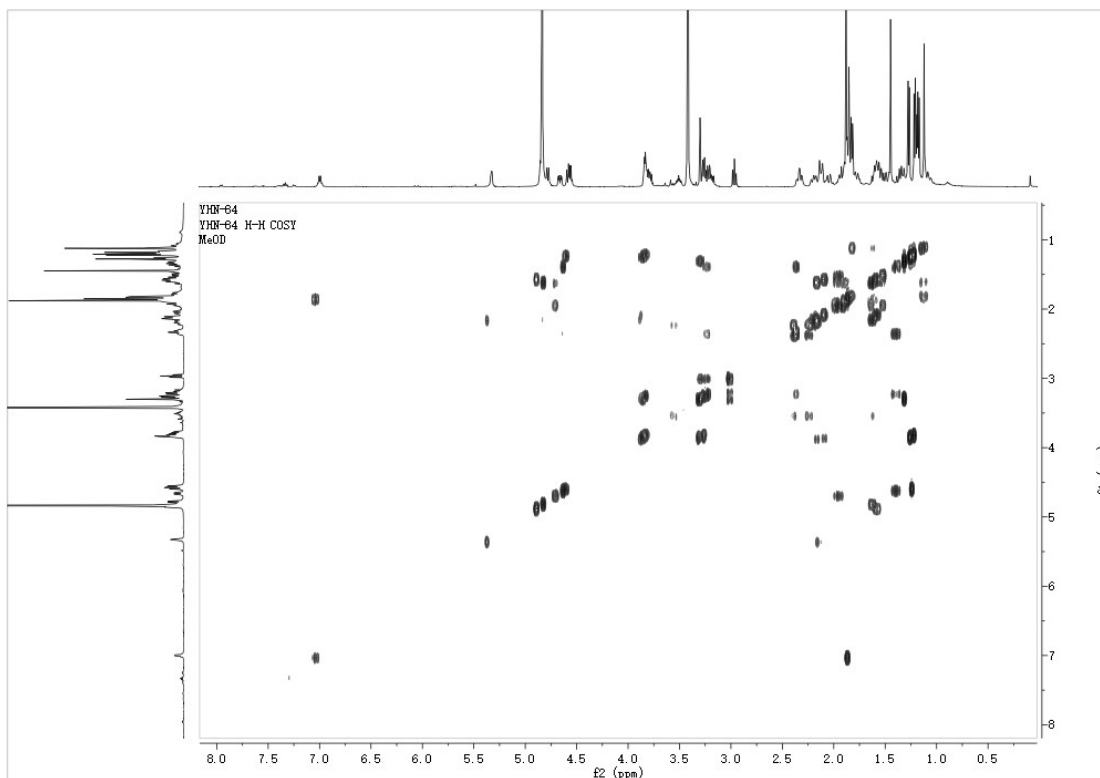

Figure S95.  $^1\text{H}$ - $^1\text{H}$  COSY of **14** in  $\text{CD}_3\text{OD}$

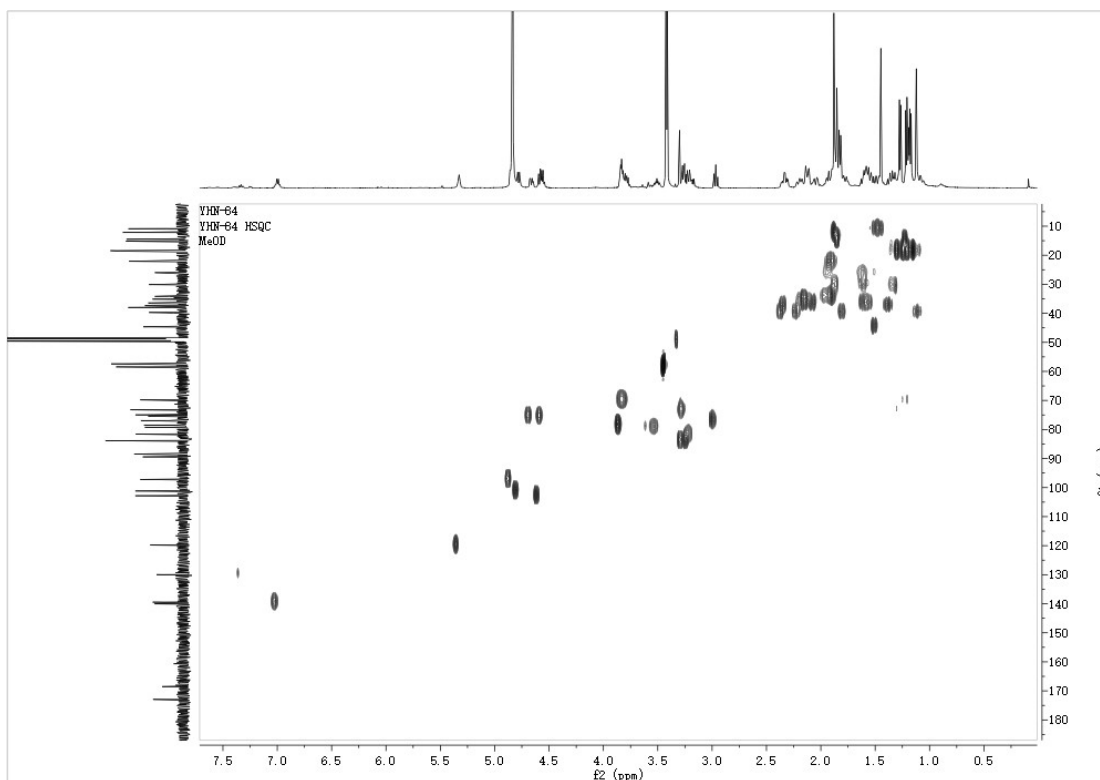

Figure S96. HSQC of **14** in  $\text{CD}_3\text{OD}$

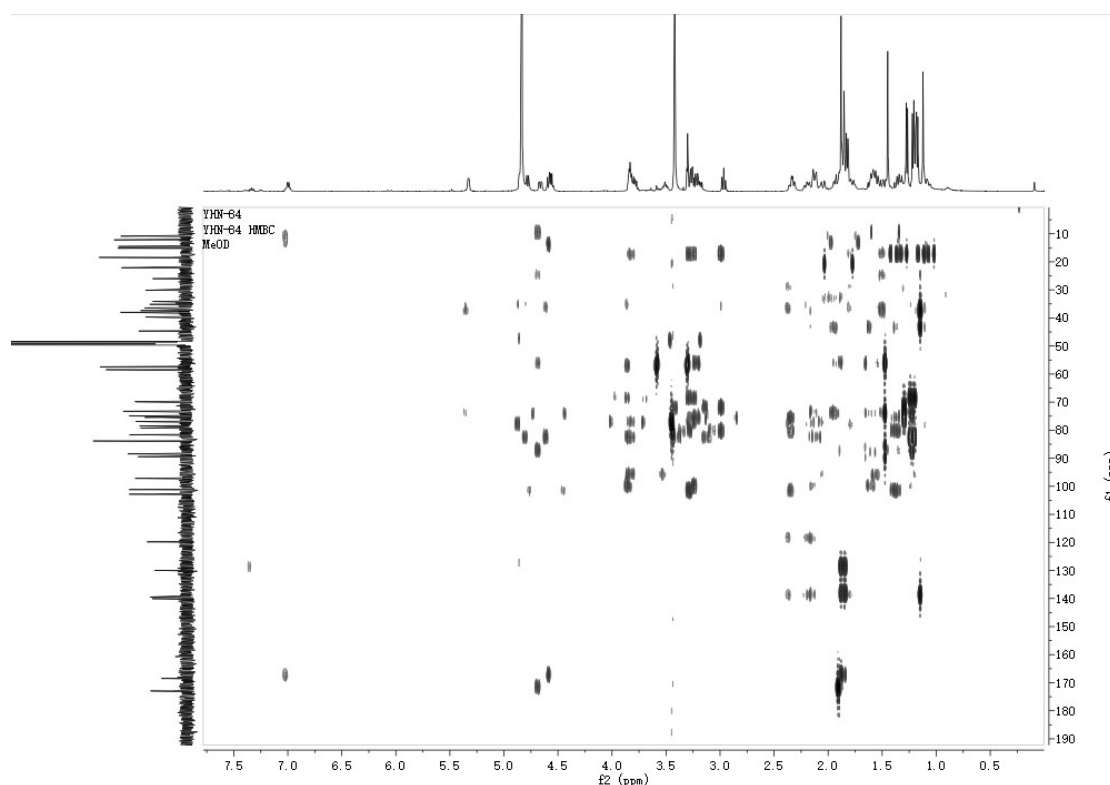

Figure S97. HMBC of 14 in CD<sub>3</sub>OD

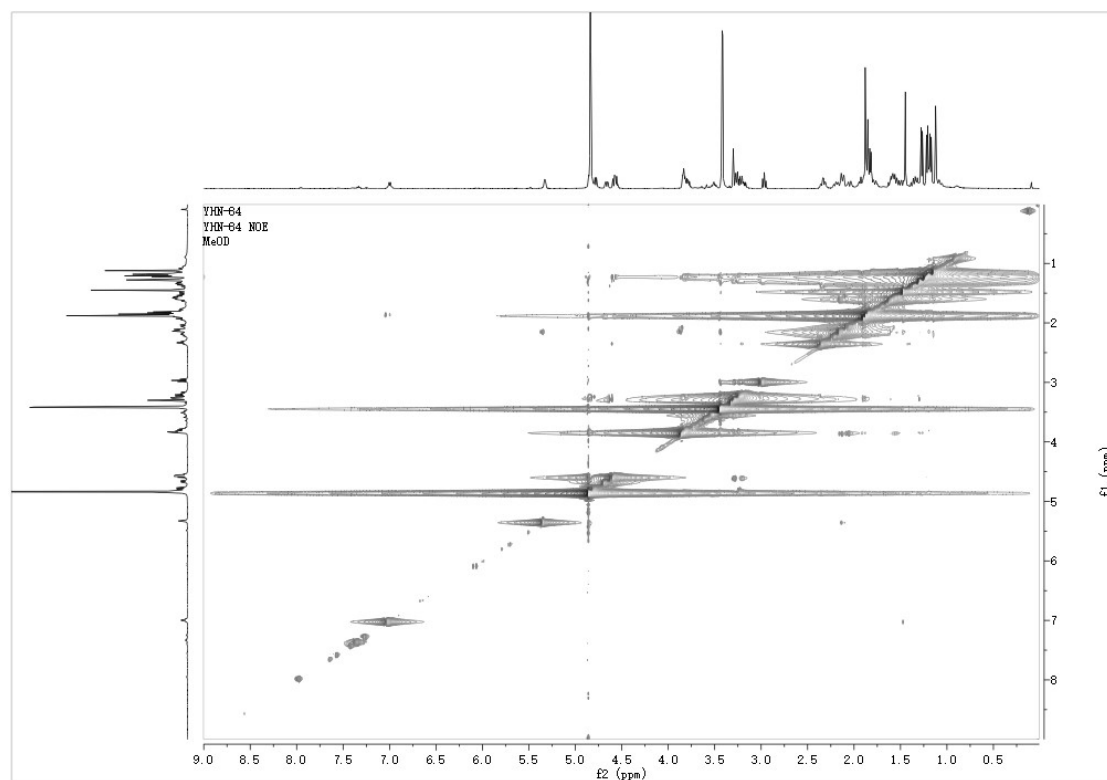

Figure S98. NOESY of 14 in CD<sub>3</sub>OD
